# Supplementary material for: Elucidating the regulatory role of long non-coding RNAs in drought stress response during seed germination in leaf mustard
Source: PeerJ. 2024 Jul 5;12:e17661. doi: 10.7717/peerj.17661 (PMC11229683; doi:10.7717/peerj.17661)
Supplement: Supplemental Information 3 [file peerj-12-17661-s003.xlsx]

## Sheet: merge
Modules	ID	Description	GeneRatio	BgRatio	pvalue	p.adjust	qvalue	geneID	Count
blue	GO:0009644	response to high light intensity	36/1469	175/68131	1.1949e-24	1.73619e-21	1.57853e-21	BjuVA03G47990/BjuV_Contig00683G00290/BjuVA03G26650/BjuVA07G29650/BjuVB06G01290/BjuVB02G60820/BjuVB05G46130/BjuVA05G15470/BjuVB08G26980/BjuVA01G19770/BjuVB03G29710/BjuVA02G30440/BjuVB06G36720/BjuVB02G28580/BjuVA08G01200/BjuVB06G18920/BjuVB01G12670/BjuVA05G15460/BjuVA09G55060/BjuVB02G72250/BjuVB03G57890/BjuVB02G10900/BjuVB08G59320/BjuVB02G60810/BjuVB06G21220/BjuVA03G47980/BjuVB06G00410/BjuVB08G0974…	36
blue	GO:0042542	response to hydrogen peroxide	29/1469	240/68131	9.59874e-14	6.97349e-11	6.34022e-11	BjuVA03G26650/BjuVA07G29650/BjuVB06G01290/BjuVB05G46130/BjuVA05G15470/BjuVB08G26980/BjuVA01G19770/BjuVA02G30440/BjuVB02G28580/BjuVA08G01200/BjuVB06G18920/BjuVB01G12670/BjuVA05G15460/BjuVA02G01920/BjuVB03G57890/BjuVA10G31310/BjuVB06G12340/BjuVB08G01070/BjuVB06G21220/BjuVB06G00410/BjuVB08G09740/BjuVB08G23720/BjuVA10G17100/BjuVB05G09580/BjuV_Contig01058_ERROPOS1500000G00110/BjuVB06G42220/BjuVA04G227…	29
blue	GO:0006950	response to stress	19/1469	113/68131	4.83917e-12	2.34377e-09	2.13093e-09	BjuVA01G42790/BjuVA03G14380/BjuVA02G15130/BjuVB05G31310/BjuVA09G46300/BjuVB06G46730/BjuVA05G00310/BjuVB02G13250/BjuVA07G24360/BjuVA07G35060/BjuVA09G58080/BjuVB04G26100/BjuVA03G36610/BjuVB03G40860/BjuVB08G58620/BjuV_Contig00859G00180/BjuVB07G32500/BjuVA06G32080/BjuVB05G09990	19
blue	GO:0010286	heat acclimation	20/1469	145/68131	5.68152e-11	1.79221e-08	1.62946e-08	BjuVA03G26650/BjuVB05G46130/BjuVB08G26980/BjuVA02G30440/BjuVB02G28580/BjuVA02G01920/BjuVB02G57370/BjuVA02G15940/BjuVA02G10920/BjuVB01G37930/BjuVA10G31310/BjuVB08G01070/BjuV_Contig01043G00040/BjuVB08G09740/BjuVA07G28360/BjuVA10G17100/BjuV_Contig01058_ERROPOS1500000G00110/BjuVB05G33810/BjuVA05G32930/BjuVA04G30640	20
blue	GO:0012511	monolayer-surrounded lipid storage body	14/1469	63/68131	6.16727e-11	1.79221e-08	1.62946e-08	BjuVA10G09100/BjuVB07G28840/BjuVB03G12530/BjuVA06G03570/BjuVB01G21890/BjuVB02G19780/BjuVA09G03110/BjuVB04G06960/BjuVB05G11920/BjuVB02G67940/BjuVA07G20650/BjuVA03G54760/BjuVB02G61980/BjuVB01G15190	14
blue	GO:0019915	lipid storage	12/1469	58/68131	3.45043e-09	8.3558e-07	7.597e-07	BjuVA10G09100/BjuVB03G12530/BjuVB01G21890/BjuVA09G36900/BjuVB02G19780/BjuVA10G04200/BjuVA07G20650/BjuVB06G38240/BjuVB02G61980/BjuVB01G15190/BjuVB03G56870/BjuVB04G39720	12
blue	GO:0016208	AMP binding	9/1469	30/68131	9.35221e-09	1.94125e-06	1.76497e-06	BjuVA01G42790/BjuVA09G46300/BjuVB06G46730/BjuVA05G00310/BjuVA07G24360/BjuVA03G36610/BjuVB08G58620/BjuV_Contig00859G00180/BjuVB07G32500	9
blue	GO:0010150	leaf senescence	26/1469	404/68131	1.03205e-06	0.000187446	0.000170424	BjuVB02G68270/BjuVA10G16510/BjuVA08G21450/BjuVA03G55120/BjuVB02G74030/BjuVA03G63280/BjuVA06G00730/BjuVA03G20760/BjuVB03G12380/BjuVB02G28000/BjuVB06G52630/BjuVB08G13970/BjuVA07G26320/BjuVB06G44390/BjuVB08G55610/BjuVA09G47480/BjuVA03G15430/BjuVB08G23720/BjuVA03G31980/BjuVA05G17290/BjuVA03G23240/BjuVA06G12620/BjuVA05G18050/BjuVB04G48610/BjuVB05G48510/BjuVB06G13980	26
blue	GO:0010344	seed oilbody biogenesis	6/1469	19/68131	2.12104e-06	0.000342431	0.000311335	BjuVB03G12530/BjuVB01G21890/BjuVA10G04200/BjuVA07G20650/BjuVB06G38240/BjuVB01G15190	6
blue	GO:0034399	nuclear periphery	9/1469	55/68131	2.56221e-06	0.000372289	0.000338482	BjuVA07G34200/BjuVB02G22210/BjuVA03G42100/BjuVA03G35990/BjuVA05G40010/BjuVB01G31530/BjuVA05G26180/BjuVA10G20210/BjuVA10G20030	9
blue	GO:0006606	protein import into nucleus	13/1469	123/68131	2.83119e-06	0.000373975	0.000340014	BjuVB02G22210/BjuVB02G08140/BjuVA05G01300/BjuVA03G43940/BjuVB03G34310/BjuVA05G40010/BjuVB03G38940/BjuVA04G02490/BjuVB06G54320/BjuVB06G20650/BjuVB06G01050/BjuVA09G66390/BjuVA07G27070	13
blue	GO:0030091	protein repair	7/1469	40/68131	2.13709e-05	0.00258767	0.00235268	BjuVA03G27230/BjuVA03G54740/BjuVB05G11930/BjuVB08G27870/BjuVB02G61950/BjuVB02G67930/BjuV_Contig00017G00190	7
blue	GO:0003743	translation initiation factor activity	18/1469	281/68131	4.77236e-05	0.00533403	0.00484964	BjuVB03G11820/BjuVB02G23680/BjuVA03G56060/BjuVB05G58280/BjuVA02G12820/BjuVB06G42460/BjuVA03G37850/BjuVB02G53330/BjuVA06G41170/BjuVA05G17200/BjuVB01G40650/BjuVB08G29910/BjuVA03G36340/BjuVA05G35680/BjuVB07G31190/BjuVA03G59140/BjuVA09G20940/BjuVB07G34620	18
blue	GO:0010228	vegetative to reproductive phase transition of meristem	21/1469	367/68131	6.06589e-05	0.00609566	0.00554211	BjuVB06G01290/BjuVA07G36460/BjuVB02G39210/BjuVA06G46560/BjuVB01G31580/BjuVA06G06910/BjuVB05G20580/BjuVA07G23900/BjuVB03G27300/BjuVA03G04370/BjuVB06G33340/BjuVB03G49970/BjuVA06G19130/BjuVA05G09990/BjuVA10G27280/BjuVA07G15630/BjuVB07G02890/BjuVA03G59610/BjuVB06G49860/BjuVB02G48020/BjuVA02G27270	21
blue	GO:0009961	response to 1-aminocyclopropane-1-carboxylic acid	4/1469	11/68131	6.29284e-05	0.00609566	0.00554211	BjuVA09G10040/BjuVB04G00090/BjuVB07G16040/BjuVA02G49580	4
blue	GO:0006970	response to osmotic stress	21/1469	371/68131	7.07132e-05	0.00642164	0.00583849	BjuVB04G33840/BjuVB01G00150/BjuVA09G33870/BjuVA04G34860/BjuVB06G52630/BjuVA05G06100/BjuVA07G26320/BjuVB06G44390/BjuVB04G42820/BjuVB02G42000/BjuVA05G09990/BjuVB08G23720/BjuVB03G56870/BjuVB02G07770/BjuVA10G30160/BjuV_Contig00784G00220/BjuVA06G37320/BjuVB06G42220/BjuVB08G43360/BjuVA09G46500/BjuVA08G24300	21
blue	GO:0016569	covalent chromatin modification	20/1469	346/68131	7.82718e-05	0.00668994	0.00608242	BjuVA08G16980/BjuVB05G12350/BjuVA09G21250/BjuVB04G15660/BjuVA08G29170/BjuVB02G36430/BjuVA03G54610/BjuVB07G13790/BjuVA01G31040/BjuVA03G54440/BjuVA03G02370/BjuVB04G33240/BjuVA05G36820/BjuVA03G48150/BjuVB08G51520/BjuVA03G23870/BjuVB08G23610/BjuVA01G02560/BjuVB06G31630/BjuVB08G01310	20
blue	GO:0030688	preribosome, small subunit precursor	4/1469	12/68131	9.2777e-05	0.00748916	0.00680907	BjuVB01G20960/BjuVB02G31130/BjuVB02G71370/BjuVA04G14810	4
blue	GO:0006511	ubiquitin-dependent protein catabolic process	23/1469	452/68131	0.000160927	0.0123067	0.0111891	BjuVA07G36460/BjuVA09G02420/BjuVA02G46290/BjuVA07G28830/BjuVB04G12120/BjuVB06G41780/BjuVB02G30410/BjuVB03G00940/BjuVA10G15520/BjuVA01G07180/BjuVA04G31200/BjuVB08G29450/BjuVB04G43100/BjuVB06G49040/BjuVB06G33340/BjuVB06G10980/BjuVA06G15910/BjuVA05G40240/BjuVA01G35990/BjuVA06G12850/BjuVA03G28940/BjuVB05G06920/BjuVA09G66390	23
blue	GO:0016702	oxidoreductase activity, acting on single donors with incorporation of molecular oxygen, incorporation of two atoms of oxygen	4/1469	14/68131	0.000181255	0.0131682	0.0119724	BjuVB05G17080/BjuVA01G11450/BjuVB01G01610/BjuV_Contig00748G00110	4
blue	GO:0004386	helicase activity	15/1469	236/68131	0.000214729	0.0139291	0.0126642	BjuVB01G09860/BjuVB08G20810/BjuVA09G21250/BjuVB04G15660/BjuVA09G49900/BjuVB03G27300/BjuVB07G13790/BjuVA01G31040/BjuVA09G60650/BjuVA05G36820/BjuVB04G51330/BjuVB02G31310/BjuVA07G15630/BjuVB06G31630/BjuVA02G27270	15
blue	GO:0005635	nuclear envelope	15/1469	236/68131	0.000214729	0.0139291	0.0126642	BjuVB02G50120/BjuVA07G34200/BjuVA05G01300/BjuVA10G13830/BjuVA06G23310/BjuVB02G24830/BjuVA03G35990/BjuVB03G34310/BjuVB03G38940/BjuVA04G02490/BjuVB06G54320/BjuVB06G20650/BjuVB06G01050/BjuVA10G20030/BjuVA07G27070	15
blue	GO:0042753	positive regulation of circadian rhythm	7/1469	57/68131	0.000220488	0.0139291	0.0126642	BjuVA05G16530/BjuVB06G49930/BjuVB02G43420/BjuVB06G45760/BjuVB06G23890/BjuVB08G46250/BjuVA01G26940	7
blue	GO:0016607	nuclear speck	18/1469	319/68131	0.000233969	0.0141648	0.0128785	BjuVA05G36950/BjuVB06G36720/BjuVB03G29640/BjuVB02G26310/BjuVA07G12230/BjuVB04G38140/BjuVB06G16920/BjuVA07G18190/BjuVB01G29180/BjuVB07G31600/BjuVB03G49970/BjuVB01G14690/BjuVB03G14500/BjuVB02G52180/BjuVB04G28370/BjuVB06G01210/BjuVA08G22700/BjuVB02G50720	18
blue	GO:0006997	nucleus organization	6/1469	43/68131	0.000306473	0.0177936	0.0161778	BjuVA07G34200/BjuVA02G20330/BjuVA10G13830/BjuVB02G24830/BjuVA03G35990/BjuVA10G20030	6
blue	GO:0046786	viral replication complex formation and maintenance	4/1469	16/68131	0.000318399	0.0177936	0.0161778	BjuVA05G25040/BjuVB08G58180/BjuVA03G52210/BjuVB04G08900	4
blue	GO:0010501	RNA secondary structure unwinding	14/1469	226/68131	0.000444881	0.0239412	0.0217671	BjuVB02G23660/BjuVB01G31840/BjuVB08G58560/BjuVA07G24390/BjuVA03G37850/BjuVB07G24140/BjuVB01G40650/BjuVA10G12650/BjuVB04G02730/BjuVA05G35680/BjuVB08G34000/BjuVB07G31190/BjuVB07G00540/BjuVA03G31750	14
blue	GO:0048573	photoperiodism, flowering	10/1469	128/68131	0.000480881	0.0249543	0.0226882	BjuVB03G29640/BjuVA07G12230/BjuVB06G14120/BjuVB01G03250/BjuVA04G31990/BjuVB06G45760/BjuVA05G02770/BjuVB06G02480/BjuVA05G39540/BjuVB06G13980	10
blue	GO:0000285	1-phosphatidylinositol-3-phosphate 5-kinase activity	4/1469	18/68131	0.000517236	0.0259153	0.0235619	BjuVB05G54440/BjuVA03G38040/BjuVA02G22050/BjuVB03G43550	4
blue	GO:0005681	spliceosomal complex	20/1469	408/68131	0.000664166	0.0321678	0.0292466	BjuVA01G33180/BjuVB07G12270/BjuVB06G36720/BjuVB01G20400/BjuVB03G29640/BjuVA07G12230/BjuVB03G21110/BjuVB04G38140/BjuVB06G43440/BjuVB03G27300/BjuVA07G44700/BjuVB07G31600/BjuVB03G49970/BjuVB02G13230/BjuVB04G28370/BjuVA07G15630/BjuVB07G02890/BjuVA02G27270/BjuVB02G50720/BjuVB01G47590	20
blue	GO:0009790	embryo development	4/1469	20/68131	0.000791318	0.0370898	0.0337217	BjuVA09G33870/BjuVB04G42820/BjuVB02G42000/BjuVA10G30160	4
blue	GO:0003006	developmental process involved in reproduction	4/1469	21/68131	0.000960893	0.0436305	0.0396684	BjuVA06G11020/BjuVA02G26300/BjuVB06G34340/BjuVA03G31980	4
blue	GO:0003960	NADPH:quinone reductase activity	3/1469	10/68131	0.00107163	0.0457963	0.0416375	BjuVB07G18960/BjuVA01G13340/BjuVA09G07140	3
blue	GO:0010226	response to lithium ion	3/1469	10/68131	0.00107163	0.0457963	0.0416375	BjuVB07G26730/BjuVA05G26330/BjuVB01G31660	3
brown	GO:0009644	response to high light intensity	42/2038	175/68131	7.24449e-26	1.2178e-22	1.09582e-22	BjuVB02G28580/BjuVA07G29650/BjuVA03G26650/BjuVB02G60820/BjuVB02G72250/BjuVB05G33810/BjuVA01G19770/BjuVB05G46130/BjuVA05G13090/BjuVB01G12670/BjuVB04G47780/BjuVB08G59320/BjuVA03G47980/BjuVB03G29710/BjuVA05G15460/BjuVA05G15470/BjuVB02G10900/BjuVB03G57890/BjuVA07G40210/BjuVB06G21220/BjuVA04G22740/BjuVA08G01200/BjuVA08G38390/BjuVA06G01310/BjuVA02G30440/BjuVB02G60810/BjuVB06G36720/BjuVB06G00410/BjuVB08…	42
brown	GO:0042542	response to hydrogen peroxide	38/2038	240/68131	5.97625e-17	4.13645e-14	3.72214e-14	BjuVB02G28580/BjuVA07G29650/BjuVA03G26650/BjuVA01G19770/BjuVB05G46130/BjuVA05G13090/BjuVB01G12670/BjuVB04G47780/BjuVA02G01920/BjuVA05G15460/BjuVA05G15470/BjuVB06G42220/BjuVB03G57890/BjuVA07G40210/BjuVB06G21220/BjuVA04G22740/BjuVA08G01200/BjuV_Contig01058_ERROPOS1500000G00110/BjuVA06G01310/BjuVA02G30440/BjuVB06G00410/BjuVB08G09740/BjuVB07G48840/BjuVB06G18920/BjuVB06G40750/BjuVA07G28340/BjuVB08G269…	38
brown	GO:0012511	monolayer-surrounded lipid storage body	21/2038	63/68131	7.38212e-17	4.13645e-14	3.72214e-14	BjuVA04G20370/BjuVA10G09100/BjuVB02G67940/BjuVB01G15190/BjuVB02G19780/BjuVB01G21890/BjuVB07G28840/BjuVB04G06960/BjuVA08G21620/BjuVA09G03110/BjuVB03G12530/BjuVA06G03570/BjuVB05G11920/BjuVA05G31110/BjuVB07G45350/BjuVA03G46720/BjuVB07G23450/BjuVA03G54760/BjuVA01G17050/BjuVB02G61980/BjuVA07G20650	21
brown	GO:0019915	lipid storage	19/2038	58/68131	3.15589e-15	1.32626e-12	1.19342e-12	BjuVA04G20370/BjuVA10G09100/BjuVB06G38240/BjuVB01G15190/BjuVB02G19780/BjuVB03G56870/BjuVA09G36900/BjuVB01G21890/BjuVB04G23800/BjuVA10G04200/BjuVA08G21620/BjuVB04G39720/BjuVB03G12530/BjuVB07G45350/BjuVA03G46720/BjuVA02G06990/BjuVB08G05800/BjuVB02G61980/BjuVA07G20650	19
brown	GO:0006950	response to stress	25/2038	113/68131	4.20208e-15	1.41274e-12	1.27124e-12	BjuVA03G14380/BjuVB05G31310/BjuVB06G46730/BjuVB02G13250/BjuVA09G46300/BjuVA07G24360/BjuVB08G58620/BjuVA09G58080/BjuVA10G24300/BjuVB08G25550/BjuVB05G20000/BjuVA01G42790/BjuVB04G26100/BjuVA07G35060/BjuVA05G32740/BjuVB03G40860/BjuVA03G36610/BjuVB01G42360/BjuVB07G04930/BjuVB07G32500/BjuVA05G37620/BjuVA02G15130/BjuVA05G00310/BjuVA02G13090/BjuVA01G00320	25
brown	GO:0010344	seed oilbody biogenesis	11/2038	19/68131	1.01265e-12	2.83711e-10	2.55295e-10	BjuVA04G20370/BjuVB06G38240/BjuVB01G15190/BjuVB01G21890/BjuVA10G04200/BjuVA08G21620/BjuVB03G12530/BjuVB07G45350/BjuVA02G06990/BjuVB08G05800/BjuVA07G20650	11
brown	GO:0010286	heat acclimation	25/2038	145/68131	1.67602e-12	4.02484e-10	3.62172e-10	BjuVB02G28580/BjuVA03G26650/BjuVB05G33810/BjuVB02G57370/BjuVB05G46130/BjuVA02G01920/BjuVA05G32930/BjuVB03G15160/BjuVA03G51920/BjuVA04G30640/BjuVB04G10890/BjuVB01G37930/BjuV_Contig01058_ERROPOS1500000G00110/BjuVB03G49880/BjuVA02G30440/BjuVA07G42550/BjuVB07G08110/BjuVB08G09740/BjuVA02G15940/BjuVB08G26980/BjuVA10G11230/BjuVA07G28360/BjuVA08G24670/BjuVA06G46210/BjuVB05G35300	25
brown	GO:0016208	AMP binding	12/2038	30/68131	2.60796e-11	5.47998e-09	4.93111e-09	BjuVB06G46730/BjuVA09G46300/BjuVA07G24360/BjuVB08G58620/BjuVA10G24300/BjuVA01G42790/BjuVA03G36610/BjuVB01G42360/BjuVB07G04930/BjuVB07G32500/BjuVA05G37620/BjuVA05G00310	12
brown	GO:0042807	central vacuole	11/2038	31/68131	8.14751e-10	1.43637e-07	1.2925e-07	BjuVA02G23530/BjuVB05G55980/BjuVA07G39210/BjuVB03G25850/BjuVA07G30200/BjuVB03G45780/BjuVB04G29740/BjuVB03G25860/BjuVB03G35190/BjuVA06G13440/BjuVA09G59990	11
brown	GO:0045735	nutrient reservoir activity	25/2038	192/68131	8.54471e-10	1.43637e-07	1.2925e-07	BjuVB05G33810/BjuVA01G09610/BjuVB08G06720/BjuVB07G11830/BjuVA01G34110/BjuVB05G19460/BjuVA01G19010/BjuVA01G19030/BjuVB05G10160/BjuVB05G10150/BjuVA01G18980/BjuVB06G17870/BjuVB05G08860/BjuVA09G68070/BjuVB03G11390/BjuVA02G08520/BjuVB05G12690/BjuVA06G32150/BjuVA10G02320/BjuVA08G35100/BjuVB02G11340/BjuVB03G13550/BjuVA08G22710/BjuVA02G33790/BjuVB01G13430	25
brown	GO:0009705	plant-type vacuole membrane	35/2038	358/68131	1.24605e-09	1.9042e-07	1.71347e-07	BjuVA02G05930/BjuVA02G23530/BjuVB05G55980/BjuVB04G08900/BjuVA08G15160/BjuVB06G33500/BjuVA02G05470/BjuVA03G52210/BjuVA09G23800/BjuVA06G10300/BjuVA05G25040/BjuVA09G22250/BjuVA09G45890/BjuVA02G38330/BjuVB02G60850/BjuVB08G58180/BjuVB04G41690/BjuVB04G13450/BjuVA07G39210/BjuVB03G25850/BjuVA07G30200/BjuVB03G45780/BjuVB06G58270/BjuVB04G29740/BjuVB03G25860/BjuVB03G35190/BjuVA06G13440/BjuVA09G59990/BjuVA03…	35
brown	GO:0046786	viral replication complex formation and maintenance	8/2038	16/68131	6.56898e-09	9.20204e-07	8.28037e-07	BjuVB04G08900/BjuVA03G52210/BjuVA09G23800/BjuVA05G25040/BjuVA09G45890/BjuVA02G38330/BjuVB08G58180/BjuVB04G13450	8
brown	GO:0019953	sexual reproduction	11/2038	39/68131	1.29397e-08	1.6732e-06	1.50562e-06	BjuVA04G20370/BjuVA10G09100/BjuVB01G15190/BjuVB02G19780/BjuVA08G21620/BjuVB03G12530/BjuVB07G45350/BjuVA03G46720/BjuVB02G61980/BjuVB02G76050/BjuVA06G48270	11
brown	GO:0050736	O-malonyltransferase activity	9/2038	27/68131	5.42306e-08	6.47408e-06	5.82563e-06	BjuVA07G31280/BjuVA06G38810/BjuVA04G12150/BjuVB05G53980/BjuVB05G53990/BjuVB01G23520/BjuVB03G43030/BjuVB06G51450/BjuVA07G37090	9
brown	GO:0009790	embryo development	8/2038	20/68131	5.77699e-08	6.47408e-06	5.82563e-06	BjuVA09G33870/BjuVB07G39290/BjuVB02G42000/BjuVA10G30160/BjuVA08G09270/BjuVB06G09660/BjuVA05G10010/BjuVB04G42820	8
brown	GO:0005746	mitochondrial respirasome	6/2038	10/68131	1.34684e-07	1.41503e-05	1.2733e-05	BjuVA04G13790/BjuVA09G54370/BjuVA07G26210/BjuVB08G25440/BjuVB06G44610/BjuVB01G21920	6
brown	GO:0034220	ion transmembrane transport	15/2038	95/68131	1.52111e-07	1.50411e-05	1.35346e-05	BjuVA02G23530/BjuVB05G55980/BjuVA07G39210/BjuVB03G25850/BjuVA07G30200/BjuVB03G45780/BjuVB04G29740/BjuVB03G25860/BjuVB03G35190/BjuVA06G13440/BjuVA09G59990/BjuVB08G19290/BjuVA09G00200/BjuVA04G34020/BjuVA05G08610	15
brown	GO:0019243	methylglyoxal catabolic process to D-lactate via S-lactoyl-glutathione	10/2038	46/68131	8.55703e-07	7.99132e-05	7.19091e-05	BjuVA05G13110/BjuVB01G43310/BjuVA06G00710/BjuVB06G21200/BjuVB02G01670/BjuV_Contig00477G00190/BjuVB04G48620/BjuVA09G66920/BjuV_Contig00855G00420/BjuVA05G38600	10
brown	GO:0030091	protein repair	9/2038	40/68131	2.2277e-06	0.000197093	0.000177352	BjuV_Contig00017G00190/BjuVB02G61950/BjuVA10G29780/BjuVA03G54740/BjuVB08G27870/BjuVB02G41360/BjuVA03G27230/BjuVB02G67930/BjuVB05G11930	9
brown	GO:0015250	water channel activity	15/2038	121/68131	3.6e-06	0.00030258	0.000272274	BjuVA02G23530/BjuVB05G55980/BjuVA07G39210/BjuVB03G25850/BjuVA07G30200/BjuVB03G45780/BjuVB04G29740/BjuVB03G25860/BjuVB03G35190/BjuVA06G13440/BjuVA09G59990/BjuVB08G19290/BjuVB04G07640/BjuVA09G00200/BjuVA05G08610	15
brown	GO:0015254	glycerol channel activity	15/2038	126/68131	5.96768e-06	0.000477698	0.000429852	BjuVA02G23530/BjuVB05G55980/BjuVA07G39210/BjuVB03G25850/BjuVA07G30200/BjuVB03G45780/BjuVB04G29740/BjuVB03G25860/BjuVB03G35190/BjuVA06G13440/BjuVA09G59990/BjuVB08G19290/BjuVA09G00200/BjuVA04G34020/BjuVA05G08610	15
brown	GO:0055046	microgametogenesis	9/2038	47/68131	9.19576e-06	0.00070264	0.000632263	BjuVB02G30430/BjuVB02G37610/BjuVB05G37120/BjuVA10G31040/BjuVA03G41150/BjuVB07G10730/BjuVB02G42870/BjuVB07G32860/BjuVA05G27960	9
brown	GO:0016607	nuclear speck	25/2038	319/68131	1.4445e-05	0.00105574	0.000949999	BjuVB03G29640/BjuVA07G12230/BjuVA10G15870/BjuVA05G36950/BjuVB08G10580/BjuVB02G26310/BjuVB02G52180/BjuVA09G11950/BjuVB03G43630/BjuVB02G27360/BjuVA09G19970/BjuVB06G36720/BjuVB07G31600/BjuVB04G28370/BjuVB01G47050/BjuVA01G41280/BjuVA05G37540/BjuVB03G49970/BjuVB02G49970/BjuVA04G04700/BjuVA09G41300/BjuVB01G42290/BjuVA05G42720/BjuVB01G44340/BjuVB01G21530	25
brown	GO:0048316	seed development	21/2038	243/68131	1.60744e-05	0.00111456	0.00100293	BjuVA05G09320/BjuVB06G09020/BjuVB01G07420/BjuVA09G33870/BjuVB02G37610/BjuVB06G01650/BjuVB06G10980/BjuVB07G39290/BjuVB02G42000/BjuVA10G30160/BjuVA08G09270/BjuVB06G09660/BjuVA05G10010/BjuVA03G41150/BjuVA02G06990/BjuVB08G05800/BjuVB07G10730/BjuVB04G42820/BjuVB03G28480/BjuVB04G46320/BjuVA05G27960	21
brown	GO:0009992	cellular water homeostasis	15/2038	137/68131	1.65759e-05	0.00111456	0.00100293	BjuVA02G23530/BjuVB05G55980/BjuVA07G39210/BjuVB03G25850/BjuVA07G30200/BjuVB03G45780/BjuVB04G29740/BjuVB03G25860/BjuVB03G35190/BjuVA06G13440/BjuVA09G59990/BjuVB08G19290/BjuVA09G00200/BjuVA04G34020/BjuVA05G08610	15
brown	GO:0009228	thiamine biosynthetic process	7/2038	30/68131	2.35845e-05	0.00152483	0.0013721	BjuVA02G14940/BjuVB02G23480/BjuVB08G12750/BjuVB07G29570/BjuVA10G12510/BjuVB05G20280/BjuVB05G31520	7
brown	GO:0071786	endoplasmic reticulum tubular network organization	6/2038	21/68131	2.6212e-05	0.00163194	0.00146849	BjuVA08G22320/BjuVA03G53690/BjuVB02G15500/BjuVB08G29850/BjuVA09G56690/BjuVB02G67040	6
brown	GO:0004462	lactoylglutathione lyase activity	5/2038	14/68131	3.80672e-05	0.00228539	0.00205649	BjuVA05G13110/BjuVB06G21200/BjuVB03G04470/BjuV_Contig00477G00190/BjuV_Contig00855G00420	5
brown	GO:0071782	endoplasmic reticulum tubular network	6/2038	23/68131	4.63215e-05	0.00268505	0.00241611	BjuVA08G22320/BjuVA03G53690/BjuVB02G15500/BjuVB08G29850/BjuVA09G56690/BjuVB02G67040	6
brown	GO:0008113	peptide-methionine (S)-S-oxide reductase activity	6/2038	24/68131	6.01978e-05	0.00337309	0.00303524	BjuVB02G61950/BjuVA10G29780/BjuVA03G54740/BjuVB02G41360/BjuVB02G67930/BjuVB05G11930	6
brown	GO:0006970	response to osmotic stress	26/2038	371/68131	6.57639e-05	0.0035661	0.00320892	BjuVA09G33870/BjuVB04G33840/BjuVA04G34860/BjuVB03G56870/BjuVA06G37320/BjuVB07G39290/BjuVB04G23800/BjuVB06G42220/BjuVB06G52630/BjuVB06G07100/BjuVA01G30770/BjuVB01G00150/BjuVB02G42000/BjuVA10G30160/BjuVA10G14710/BjuVA08G09270/BjuVB06G09660/BjuVA05G10010/BjuV_Contig00784G00220/BjuVB04G42820/BjuVA07G28340/BjuVB02G25830/BjuVA05G09990/BjuVB02G07770/BjuVB02G72920/BjuVB02G75180	26
brown	GO:0050826	response to freezing	9/2038	63/68131	0.000104015	0.00546405	0.00491677	BjuVA04G20370/BjuVB05G33810/BjuVB01G15190/BjuVB01G21890/BjuVA08G21620/BjuVB03G12530/BjuVB07G45350/BjuVB03G04950/BjuVA07G20650	9
brown	GO:0006739	NADP metabolic process	5/2038	17/68131	0.000109162	0.00556064	0.00500369	BjuVB05G39030/BjuVA01G13340/BjuVB05G15240/BjuVB08G07320/BjuVA02G08600	5
brown	GO:0003960	NADPH:quinone reductase activity	4/2038	10/68131	0.000145072	0.00696761	0.00626973	BjuVB07G18960/BjuVA01G13340/BjuVB05G15240/BjuVA09G07140	4
brown	GO:0044571	[2Fe-2S] cluster assembly	4/2038	10/68131	0.000145072	0.00696761	0.00626973	BjuVB05G14550/BjuVA01G14070/BjuVB03G20770/BjuVA08G15790	4
brown	GO:0006012	galactose metabolic process	9/2038	66/68131	0.00015014	0.0069764	0.00627765	BjuVB05G13130/BjuVA09G19070/BjuVB04G17600/BjuVB02G72710/BjuVB06G00410/BjuVA04G34640/BjuVB03G05020/BjuVB04G25280/BjuVA05G00720	9
brown	GO:0000209	protein polyubiquitination	22/2038	305/68131	0.000153555	0.0069764	0.00627765	BjuVA07G41060/BjuVB02G45200/BjuVA05G01920/BjuVB04G41230/BjuVB03G24550/BjuVA09G35430/BjuVA07G36460/BjuVB06G01620/BjuVB02G55670/BjuVB07G17310/BjuVB04G01870/BjuVB01G47050/BjuVA10G33540/BjuVB03G47990/BjuVA06G28630/BjuVB07G22710/BjuVA02G47710/BjuVA06G12850/BjuVA03G22590/BjuVB06G12120/BjuVA05G42720/BjuVB06G33340	22
brown	GO:0052689	carboxylic ester hydrolase activity	13/2038	133/68131	0.000189414	0.00816798	0.00734988	BjuVA06G03090/BjuVB02G59630/BjuVA06G03100/BjuVA05G02300/BjuVB03G26500/BjuVB06G05210/BjuVA08G03530/BjuVB04G50530/BjuVB04G50540/BjuVB02G63080/BjuVB04G45080/BjuVA02G09190/BjuVA05G05490	13
brown	GO:0005811	lipid droplet	9/2038	68/68131	0.000189501	0.00816798	0.00734988	BjuVB06G38240/BjuVA10G12900/BjuVB02G23920/BjuVA10G04200/BjuVA03G27350/BjuVB08G28020/BjuVA01G18680/BjuVA02G17510/BjuVB03G42000	9
brown	GO:0006914	autophagy	13/2038	134/68131	0.000204089	0.00857686	0.0077178	BjuVA02G23530/BjuVA03G24550/BjuVB05G55980/BjuVA03G49260/BjuVB01G38940/BjuVB06G52630/BjuVB08G34130/BjuVA07G39210/BjuVA07G30200/BjuVB03G45780/BjuVB02G59770/BjuVB03G35190/BjuVA01G13810	13
brown	GO:0047216	inositol 3-alpha-galactosyltransferase activity	5/2038	20/68131	0.00025379	0.0104054	0.00936318	BjuVA09G19070/BjuVB04G17600/BjuVB06G00410/BjuVA04G34640/BjuVA05G00720	5
brown	GO:0009527	plastid outer membrane	5/2038	21/68131	0.000324908	0.0121715	0.0109524	BjuVB07G35660/BjuVB05G19840/BjuVA01G21930/BjuVA03G48990/BjuVB02G60010	5
brown	GO:0097428	protein maturation by iron-sulfur cluster transfer	5/2038	21/68131	0.000324908	0.0121715	0.0109524	BjuVB05G14550/BjuVA01G14070/BjuVB03G20770/BjuVA08G34490/BjuVA08G15790	5
brown	GO:0080153	negative regulation of reductive pentose-phosphate cycle	4/2038	12/68131	0.000325922	0.0121715	0.0109524	BjuVA03G25430/BjuVB01G00320/BjuVB08G25450/BjuVA04G34720	4
brown	GO:0004602	glutathione peroxidase activity	6/2038	32/68131	0.000330285	0.0121715	0.0109524	BjuVB08G15580/BjuVA02G18190/BjuVB05G46710/BjuVA03G16950/BjuVB05G49910/BjuVA06G23310	6
brown	GO:0010287	plastoglobule	18/2038	238/68131	0.000333069	0.0121715	0.0109524	BjuVB01G30550/BjuVB02G72250/BjuVA01G11450/BjuVB08G39310/BjuVA04G26430/BjuVA07G09480/BjuVB01G08830/BjuVB01G19270/BjuVB01G43940/BjuVB05G17080/BjuVA05G07830/BjuVB06G07650/BjuVB02G39140/BjuVA05G07840/BjuVB08G19800/BjuVA03G60490/BjuVB03G31570/BjuVB04G41560	18
brown	GO:0000326	protein storage vacuole	8/2038	62/68131	0.000508815	0.0181983	0.0163755	BjuVA02G23530/BjuVB05G55980/BjuVB04G28400/BjuVA07G39210/BjuVA07G30200/BjuVB03G45780/BjuVB03G35190/BjuVA09G68070	8
brown	GO:0031305	integral component of mitochondrial inner membrane	6/2038	35/68131	0.000548041	0.0191928	0.0172705	BjuVB08G19460/BjuVB07G35660/BjuVB05G19840/BjuVA01G21930/BjuVA03G48990/BjuVB02G60010	6
brown	GO:0004416	hydroxyacylglutathione hydrolase activity	4/2038	14/68131	0.000628246	0.0203621	0.0183227	BjuVB01G43310/BjuVB02G01670/BjuVA09G66920/BjuVA05G38600	4
brown	GO:0016702	oxidoreductase activity, acting on single donors with incorporation of molecular oxygen, incorporation of two atoms of oxygen	4/2038	14/68131	0.000628246	0.0203621	0.0183227	BjuVA01G11450/BjuVB01G01610/BjuV_Contig00748G00110/BjuVB05G17080	4
brown	GO:0008200	ion channel inhibitor activity	5/2038	24/68131	0.000629881	0.0203621	0.0183227	BjuVA05G03710/BjuVB08G23500/BjuVA03G23740/BjuVA03G23750/BjuVB06G03450	5
brown	GO:0048638	regulation of developmental growth	5/2038	24/68131	0.000629881	0.0203621	0.0183227	BjuVA10G15870/BjuVB08G10580/BjuVB02G27360/BjuVB07G27600/BjuVB01G45840	5
brown	GO:0005759	mitochondrial matrix	23/2038	362/68131	0.000667283	0.0211642	0.0190444	BjuVB07G41000/BjuVB05G14550/BjuVA03G29010/BjuVA01G14070/BjuVA07G44470/BjuVB07G14720/BjuVB03G20770/BjuVA08G17300/BjuVA05G44430/BjuVB01G48740/BjuVA06G17310/BjuVA08G34490/BjuVB08G30250/BjuVB08G55210/BjuVA09G47870/BjuVB06G57630/BjuVB08G39860/BjuVB06G04310/BjuVA08G15790/BjuVB05G09970/BjuVA06G31450/BjuVA06G00740/BjuVB04G24250	23
brown	GO:0005814	centriole	4/2038	15/68131	0.000836449	0.0255649	0.0230043	BjuVA03G46030/BjuVB02G62610/BjuVB01G47050/BjuVA05G42720	4
brown	GO:0033512	L-lysine catabolic process to acetyl-CoA via saccharopine	4/2038	15/68131	0.000836449	0.0255649	0.0230043	BjuVB03G04500/BjuVA01G05020/BjuVA08G33670/BjuVB05G04850	4
brown	GO:0016602	CCAAT-binding factor complex	6/2038	38/68131	0.000863602	0.0259235	0.023327	BjuVB02G37610/BjuVA03G41150/BjuVB07G10730/BjuVB04G46320/BjuVB06G10170/BjuVA05G27960	6
brown	GO:0071458	integral component of cytoplasmic side of endoplasmic reticulum membrane	6/2038	39/68131	0.000995008	0.029344	0.0264049	BjuVA08G22320/BjuVA03G53690/BjuVB02G15500/BjuVB08G29850/BjuVA09G56690/BjuVB02G67040	6
brown	GO:0010038	response to metal ion	4/2038	16/68131	0.00108893	0.0315602	0.0283991	BjuVB06G22600/BjuVA05G11460/BjuVB01G20130/BjuVA04G15640	4
brown	GO:0010187	negative regulation of seed germination	8/2038	72/68131	0.00138535	0.0394706	0.0355173	BjuVA05G09320/BjuVB06G09020/BjuVB01G07420/BjuVA09G39270/BjuVA04G32230/BjuVB02G32170/BjuVB03G13740/BjuVB02G25570	8
green	GO:0009534	chloroplast thylakoid	96/3208	484/68131	3.47451e-33	6.34793e-30	5.32515e-30	BjuVA09G00690/BjuVB07G49690/BjuVA07G17590/BjuVB02G69190/BjuVB06G16160/BjuVA10G02070/BjuVA01G19350/BjuVB01G03310/BjuVA09G00600/BjuVB06G04530/BjuVA08G25460/BjuVB05G09870/BjuVA03G29500/BjuVA03G44070/BjuVB08G31180/BjuVA08G10920/BjuVA05G44830/BjuVB05G15540/BjuVA05G16890/BjuVA09G23350/BjuVB02G12700/BjuVB04G41560/BjuVB01G33270/BjuVA05G30680/BjuVA08G00420/BjuVB06G24830/BjuVA01G16990/BjuVA06G47410/BjuVA07…	96
green	GO:0015995	chlorophyll biosynthetic process	48/3208	137/68131	5.53165e-29	5.05316e-26	4.23899e-26	BjuVB02G69190/BjuVA01G19350/BjuVB05G09870/BjuVA01G22480/BjuVB05G20280/BjuVA07G24870/BjuVB05G17680/BjuVB02G58490/BjuVB08G58000/BjuVA02G02920/BjuVB01G33270/BjuVB06G46140/BjuVA01G16990/BjuVA07G23380/BjuVB01G39670/BjuVA04G30900/BjuVB02G32770/BjuVA02G24220/BjuVB03G47110/BjuVA08G37910/BjuVA01G29520/BjuVA01G10710/BjuVA03G54690/BjuVA03G56270/BjuVB07G15170/BjuVA09G45730/BjuVA03G05820/BjuVA09G52110/BjuVA10…	48
green	GO:0004601	peroxidase activity	65/3208	346/68131	1.31748e-21	8.02344e-19	6.73069e-19	BjuVA03G20880/BjuVB07G38870/BjuVA02G16970/BjuVA03G20050/BjuVB08G19260/BjuVB08G06460/BjuVA08G37170/BjuVA03G21450/BjuVA09G09290/BjuVA01G34680/BjuVA03G63660/BjuVA10G07120/BjuVB01G06820/BjuVA03G08190/BjuVA05G44590/BjuVB07G00340/BjuVA04G28270/BjuVB02G68450/BjuVB04G41240/BjuVA03G55290/BjuVB05G14790/BjuVB08G14700/BjuVA03G25520/BjuVB02G01240/BjuVB03G46310/BjuVA07G39620/BjuVB06G13150/BjuVB01G42630/BjuVA09…	65
green	GO:0009664	plant-type cell wall organization	50/3208	250/68131	3.7602e-18	1.71747e-15	1.44075e-15	BjuVB07G38870/BjuVA02G16970/BjuVA03G20050/BjuVB08G19260/BjuVB08G06460/BjuVA08G37170/BjuVB06G05480/BjuVA03G21450/BjuVA06G08770/BjuVB01G06820/BjuVA03G08190/BjuVA05G44590/BjuVB07G00340/BjuVB03G04910/BjuVB02G05570/BjuVB04G25110/BjuVA04G28270/BjuVB02G68450/BjuVB04G41240/BjuVA03G55290/BjuVB05G14790/BjuVB02G01240/BjuVB06G13150/BjuVB06G18430/BjuVA09G56000/BjuVA04G22330/BjuVA09G50710/BjuVA04G16280/BjuVB01…	50
green	GO:0015979	photosynthesis	58/3208	334/68131	9.02216e-18	3.2967e-15	2.76553e-15	BjuVB06G19790/BjuVB07G49690/BjuVB02G69190/BjuVA01G19350/BjuVA07G44100/BjuVA04G23430/BjuVB05G20330/BjuVA01G22520/BjuVA02G19380/BjuVA09G08420/BjuVB06G13060/BjuVB05G09870/BjuVB05G59530/BjuVB05G17680/BjuVA08G10920/BjuVB02G58490/BjuVB05G15540/BjuVA05G16890/BjuVA05G42600/BjuVB04G41560/BjuVB01G12040/BjuVB08G26050/BjuVA10G05220/BjuVA08G00420/BjuVB06G24830/BjuVA07G23380/BjuVA07G16240/BjuVA08G36600/BjuVA02…	58
green	GO:0042744	hydrogen peroxide catabolic process	53/3208	287/68131	1.47012e-17	4.4765e-15	3.75524e-15	BjuVA03G20880/BjuVB07G38870/BjuVA02G16970/BjuVA03G20050/BjuVB08G19260/BjuVB08G06460/BjuVA08G37170/BjuVA03G21450/BjuVA09G09290/BjuVA01G34680/BjuVA03G63660/BjuVA10G07120/BjuVB01G06820/BjuVA03G08190/BjuVA05G44590/BjuVB07G00340/BjuVA04G28270/BjuVB02G68450/BjuVB04G41240/BjuVA03G55290/BjuVB05G14790/BjuVB02G01240/BjuVB06G13150/BjuVA03G45420/BjuVB02G09870/BjuVA09G56000/BjuVA01G25760/BjuVA01G07890/BjuVA09…	53
green	GO:0015254	glycerol channel activity	31/3208	126/68131	2.19124e-14	5.71914e-12	4.79767e-12	BjuVA03G10870/BjuVA03G39030/BjuVB05G60040/BjuVB07G29830/BjuV_Contig00907G00350/BjuVA03G20070/BjuVB08G19280/BjuV_Contig00886G00110/BjuVA04G34020/BjuVB06G53130/BjuVA02G31560/BjuVB06G05530/BjuVA05G05800/BjuVB06G08390/BjuVB01G38360/BjuVA05G08610/BjuVB08G20780/BjuVB08G19290/BjuV_Contig01041G00070/BjuVA03G53400/BjuVA04G28060/BjuVB02G66830/BjuVA09G00200/BjuVB08G52480/BjuVB01G01030/BjuVB08G34110/BjuVB07G…	31
green	GO:0006833	water transport	19/3208	47/68131	1.13181e-13	2.58478e-11	2.16832e-11	BjuVA03G39030/BjuVB07G29830/BjuV_Contig00907G00350/BjuVA03G20070/BjuVB08G19280/BjuVB06G08390/BjuVB01G38360/BjuVA05G08610/BjuVB06G42830/BjuVB08G19290/BjuV_Contig01041G00070/BjuVA04G28060/BjuVA09G00200/BjuVB03G51650/BjuVB08G52480/BjuVB08G34110/BjuVB07G07850/BjuVA05G33390/BjuVB08G18960	19
green	GO:0009992	cellular water homeostasis	31/3208	137/68131	2.51417e-13	5.10377e-11	4.28144e-11	BjuVA03G10870/BjuVA03G39030/BjuVB05G60040/BjuVB07G29830/BjuV_Contig00907G00350/BjuVA03G20070/BjuVB08G19280/BjuV_Contig00886G00110/BjuVA04G34020/BjuVB06G53130/BjuVA02G31560/BjuVB06G05530/BjuVA05G05800/BjuVB06G08390/BjuVB01G38360/BjuVA05G08610/BjuVB08G20780/BjuVB08G19290/BjuV_Contig01041G00070/BjuVA03G53400/BjuVA04G28060/BjuVB02G66830/BjuVA09G00200/BjuVB08G52480/BjuVB01G01030/BjuVB08G34110/BjuVB07G…	31
green	GO:0032544	plastid translation	17/3208	38/68131	2.941e-13	5.3732e-11	4.50746e-11	BjuVB03G41180/BjuVA10G12320/BjuVA09G23350/BjuVA02G15020/BjuVB05G31460/BjuVA07G35340/BjuVA09G54990/BjuVA04G26060/BjuVB01G09300/BjuVB04G13840/BjuVA09G47430/BjuVB06G07450/BjuVB08G55680/BjuVA07G32110/BjuVA07G23350/BjuVA06G05650/BjuVB06G55180	17
green	GO:0009607	response to biotic stimulus	27/3208	119/68131	7.94689e-12	1.31991e-09	1.10724e-09	BjuVB03G18790/BjuVB01G02110/BjuVA02G22000/BjuVA08G22340/BjuVA01G15520/BjuVB04G09300/BjuVA02G21990/BjuVB05G54280/BjuVB03G10120/BjuVB02G67070/BjuVA01G43780/BjuVB05G13350/BjuVA02G21950/BjuVA04G11800/BjuVA07G03350/BjuVA01G17680/BjuVA02G13060/BjuVA04G33260/BjuVB05G54290/BjuVB02G70930/BjuVA03G12580/BjuVB08G11060/BjuVA03G58740/BjuVA01G43770/BjuVB02G71620/BjuVA09G23450/BjuVA01G16140	27
green	GO:0034220	ion transmembrane transport	24/3208	95/68131	9.83847e-12	1.49791e-09	1.25656e-09	BjuVA03G10870/BjuV_Contig00907G00350/BjuVA03G20070/BjuVB08G19280/BjuV_Contig00886G00110/BjuVA04G34020/BjuVB06G53130/BjuVB06G05530/BjuVA05G05800/BjuVB06G08390/BjuVA05G08610/BjuVB08G20780/BjuVB08G19290/BjuV_Contig01041G00070/BjuVA03G53400/BjuVA04G28060/BjuVB02G66830/BjuVA09G00200/BjuVB08G52480/BjuVB01G01030/BjuVB08G34110/BjuVB08G18960/BjuVA07G23390/BjuVA09G53400	24
green	GO:0009543	chloroplast thylakoid lumen	27/3208	121/68131	1.2043e-11	1.57161e-09	1.31839e-09	BjuVA07G17590/BjuVB06G16160/BjuVA10G02070/BjuVB05G00480/BjuVB06G04530/BjuVA05G44830/BjuVB08G26050/BjuV_Contig00859G00130/BjuVA05G34000/BjuVA08G37940/BjuVB06G24610/BjuVA01G00690/BjuVA07G29980/BjuVA04G01800/BjuVB01G39060/BjuVA02G31310/BjuVA01G16830/BjuVA04G04830/BjuVB08G41150/BjuVB05G20350/BjuVB03G34890/BjuVB05G47190/BjuV_Contig01019_ERROPOS2684367G00130/BjuVA03G55700/BjuVA10G26630/BjuVB02G38540/Bj…	27
green	GO:0015250	water channel activity	27/3208	121/68131	1.2043e-11	1.57161e-09	1.31839e-09	BjuVA03G10870/BjuVA03G39030/BjuVB05G60040/BjuVB07G29830/BjuV_Contig00907G00350/BjuVA03G20070/BjuVB08G19280/BjuVA06G41070/BjuVA02G31560/BjuVB06G08390/BjuVB01G38360/BjuVB02G53410/BjuVA05G08610/BjuVB04G07640/BjuVB08G20780/BjuVB08G19290/BjuV_Contig01041G00070/BjuVA03G53400/BjuVA04G28060/BjuVB02G66830/BjuVA09G00200/BjuVB08G52480/BjuVB08G34110/BjuVB07G07850/BjuVA05G33390/BjuVB08G18960/BjuVA07G23390	27
green	GO:0009654	photosystem II oxygen evolving complex	20/3208	66/68131	1.3598e-11	1.65624e-09	1.38938e-09	BjuVA07G17590/BjuVB06G16160/BjuVA07G44100/BjuVB05G59530/BjuVB05G15540/BjuVA05G42600/BjuVB08G26050/BjuVA10G05220/BjuVA08G36600/BjuVA01G13040/BjuVB05G50250/BjuVB05G40540/BjuVA01G24500/BjuV_Contig00859G00100/BjuVA04G04830/BjuVB05G20350/BjuV_Contig01019_ERROPOS2684367G00130/BjuVA10G26630/BjuVB02G38540/BjuVB05G08740	20
green	GO:0009809	lignin biosynthetic process	36/3208	215/68131	3.92263e-11	4.47916e-09	3.75747e-09	BjuVA10G17440/BjuVA02G15400/BjuVB05G20210/BjuVB02G44870/BjuVB06G07550/BjuVA01G22430/BjuVA02G11320/BjuVA05G07770/BjuVA03G21720/BjuVA03G62090/BjuVB01G07090/BjuVA06G47810/BjuVB02G75530/BjuVB01G17020/BjuVB08G13030/BjuVA03G14520/BjuVA10G11980/BjuVA03G31110/BjuVA08G17290/BjuVB02G73110/BjuVA05G30030/BjuVB08G21050/BjuVA06G01170/BjuVA04G29040/BjuVB05G28630/BjuVB05G28900/BjuVB06G16480/BjuVB02G72990/BjuVA02…	36
green	GO:0009767	photosynthetic electron transport chain	19/3208	64/68131	6.55119e-11	7.04061e-09	5.90622e-09	BjuVB02G02800/BjuVB01G33270/BjuVA03G66570/BjuVA01G30810/BjuVA09G65800/BjuVA03G29860/BjuVB05G50250/BjuVA09G02270/BjuVB07G15970/BjuVB04G19200/BjuVA05G27690/BjuV_Contig00859G00100/BjuVA06G07500/BjuVB02G46310/BjuVB07G14000/BjuVA09G17170/BjuV_Contig01019_ERROPOS2684367G00130/BjuVB08G31810/BjuVB08G37680	19
green	GO:0009682	induced systemic resistance	20/3208	72/68131	7.94873e-11	8.06796e-09	6.76804e-09	BjuVB05G14380/BjuVB04G14470/BjuVB08G30810/BjuVB08G30540/BjuVB08G30500/BjuVA03G29180/BjuVB04G14520/BjuVB04G14500/BjuVB04G14530/BjuVA06G44600/BjuVA06G44640/BjuVA06G44610/BjuVA09G22610/BjuVB07G18980/BjuVB06G04200/BjuVB06G31520/BjuVA08G33480/BjuVB08G30480/BjuVB06G32120/BjuVB08G01780	20
green	GO:0009834	plant-type secondary cell wall biogenesis	30/3208	163/68131	1.495e-10	1.43756e-08	1.20594e-08	BjuVB01G36160/BjuVA04G21650/BjuVB03G09190/BjuVA08G17770/BjuVB06G07550/BjuVA03G01000/BjuVB05G40340/BjuVA07G29010/BjuVA05G07770/BjuVA06G46660/BjuVB08G18870/BjuVA02G00930/BjuVA07G41100/BjuVB05G57260/BjuVA03G44890/BjuVB05G28690/BjuVA04G29040/BjuVA10G25760/BjuVA09G43430/BjuVA05G08630/BjuVB06G08410/BjuVB03G17090/BjuVA05G31000/BjuVB01G08070/BjuVA05G29420/BjuVB01G34830/BjuVB03G48070/BjuVB08G09310/BjuVB08…	30
green	GO:0072732	cellular response to calcium ion starvation	9/3208	12/68131	2.17542e-10	1.98725e-08	1.66706e-08	BjuVA03G30440/BjuVB05G44970/BjuVB06G52690/BjuVB06G44520/BjuVB06G52700/BjuVA04G00660/BjuVA04G00650/BjuVA07G26290/BjuVA02G29390	9
green	GO:0000311	plastid large ribosomal subunit	10/3208	16/68131	3.25883e-10	2.83518e-08	2.37837e-08	BjuVB02G54550/BjuVB04G06880/BjuVB05G43260/BjuVB02G53020/BjuVA09G24710/BjuVA02G41390/BjuVB06G36740/BjuVA06G41460/BjuVA06G39920/BjuVA09G03160	10
green	GO:0010102	lateral root morphogenesis	21/3208	88/68131	5.97136e-10	4.81514e-08	4.03932e-08	BjuVB04G29680/BjuVB06G13810/BjuVB05G51040/BjuVB05G51060/BjuVA03G29190/BjuVB05G51050/BjuVA01G14240/BjuVB06G13790/BjuVB06G13800/BjuVA09G03040/BjuVA09G03050/BjuVA03G29200/BjuVB05G51070/BjuVB06G13820/BjuVB05G51080/BjuVA08G11510/BjuVB07G20510/BjuVA02G30360/BjuVB08G39610/BjuVB02G64710/BjuVB07G36770	21
green	GO:0009773	photosynthetic electron transport in photosystem I	17/3208	57/68131	6.06175e-10	4.81514e-08	4.03932e-08	BjuVB07G49690/BjuVA06G14340/BjuVA03G44070/BjuVA05G16890/BjuVB04G12930/BjuVA08G00420/BjuVB06G24830/BjuVA02G21880/BjuVA06G47410/BjuVB04G09290/BjuV_Contig00208G00200/BjuVA02G37760/BjuVA03G28070/BjuVB08G29130/BjuV_Contig00208G00060/BjuVA04G34470/BjuVB01G00570	17
green	GO:0010287	plastoglobule	36/3208	238/68131	7.23801e-10	5.50994e-08	4.62217e-08	BjuVA07G17590/BjuVB06G16160/BjuVB02G53630/BjuVA02G40560/BjuVA09G00600/BjuVB07G42980/BjuVA08G10920/BjuVB04G41560/BjuVB02G75740/BjuVA08G24450/BjuVB04G49200/BjuVA03G28070/BjuVB06G24610/BjuVA09G61100/BjuVB04G07470/BjuVA03G21850/BjuVB08G29130/BjuVB04G07480/BjuVB03G06260/BjuVA03G28380/BjuVA08G25310/BjuVB05G40540/BjuVB07G37380/BjuVA01G24500/BjuVA08G30400/BjuVA09G35090/BjuVA07G09870/BjuVA08G20280/BjuVA04…	36
green	GO:0042349	guiding stereospecific synthesis activity	19/3208	73/68131	7.95986e-10	5.81707e-08	4.87981e-08	BjuVA07G19390/BjuVB06G18120/BjuVA04G22100/BjuVA01G15540/BjuVA06G00390/BjuVB06G25170/BjuVA05G17150/BjuVB05G13340/BjuVB07G06110/BjuVB03G13200/BjuVB07G49220/BjuVA06G00370/BjuVB01G40920/BjuVB06G56090/BjuVB08G21060/BjuVA03G21730/BjuVB07G06100/BjuVA03G65800/BjuVB04G21950	19
green	GO:0008422	beta-glucosidase activity	32/3208	196/68131	8.93371e-10	6.27765e-08	5.26618e-08	BjuVB01G44640/BjuVB04G18050/BjuVA01G31950/BjuVB08G46670/BjuVB06G04150/BjuVA01G44220/BjuVA09G44950/BjuVB06G45830/BjuVA03G52180/BjuVB04G21510/BjuVA09G18460/BjuVB02G57160/BjuVA07G25120/BjuVB04G43910/BjuVA03G11980/BjuVA05G19260/BjuVB07G03420/BjuVB08G27650/BjuVB07G47220/BjuVA05G12390/BjuVA07G07370/BjuVA03G25530/BjuVB08G10480/BjuVB06G52650/BjuVA03G35490/BjuVB08G57140/BjuVB06G04200/BjuVB06G26580/BjuVA04…	32
green	GO:0016851	magnesium chelatase activity	8/3208	10/68131	9.90097e-10	6.69966e-08	5.6202e-08	BjuVB05G17680/BjuVB02G58490/BjuVA01G10710/BjuVA03G05820/BjuVB08G04350/BjuVB04G11090/BjuVA03G50600/BjuVA02G34970	8
green	GO:0031969	chloroplast membrane	52/3208	451/68131	3.5223e-09	2.2983e-07	1.928e-07	BjuVB07G49690/BjuVB08G17230/BjuVA06G45260/BjuVA03G12870/BjuVA04G25680/BjuVB01G37750/BjuVA07G24870/BjuVA05G16890/BjuVB08G58000/BjuVB08G01220/BjuVB06G46140/BjuVA08G00420/BjuVB06G24830/BjuVA01G16990/BjuVA02G33460/BjuVA03G02240/BjuVB07G40850/BjuVB04G10930/BjuVA02G24220/BjuVB03G47110/BjuVA08G37910/BjuVB05G00030/BjuVA03G26890/BjuVA04G07790/BjuVA01G29520/BjuVA02G35240/BjuVB02G25800/BjuVA03G54690/BjuV_Co…	52
green	GO:0045492	xylan biosynthetic process	20/3208	88/68131	3.79284e-09	2.38949e-07	2.00449e-07	BjuVB01G36160/BjuVB03G09190/BjuVA08G17770/BjuVB06G48200/BjuVA09G32810/BjuVA07G22990/BjuVA05G24170/BjuVA09G48230/BjuV_Contig00580_ERROPOS930405+G00100/BjuVB05G51170/BjuVA04G29230/BjuVA03G44890/BjuVA08G35040/BjuVA09G43430/BjuVB03G32490/BjuVA03G00360/BjuVB04G44020/BjuVA05G31000/BjuVB08G49520/BjuVA10G12470	20
green	GO:0048767	root hair elongation	24/3208	131/68131	1.08318e-08	6.59659e-07	5.53374e-07	BjuVB02G05860/BjuVA03G10870/BjuVB04G20610/BjuVA01G03910/BjuVB03G05150/BjuVB06G05480/BjuVA08G32980/BjuVA06G08770/BjuVB03G04910/BjuVA09G15530/BjuVB02G05570/BjuVB04G25110/BjuVB03G19750/BjuVB05G21880/BjuVA08G16860/BjuVA07G37460/BjuVA05G05750/BjuVA08G33220/BjuVA07G31100/BjuVA01G37010/BjuVB01G36030/BjuVA09G63500/BjuVB03G17420/BjuVB04G37250	24
green	GO:0016998	cell wall macromolecule catabolic process	17/3208	69/68131	1.50976e-08	8.89781e-07	7.46419e-07	BjuVA01G27490/BjuVB08G23550/BjuVB08G23590/BjuVA03G23850/BjuVB06G08610/BjuVA08G36950/BjuVB08G45160/BjuVA04G28080/BjuVA09G19220/BjuVB08G27410/BjuVB03G01390/BjuVA10G04450/BjuVB05G43560/BjuVB08G18100/BjuVB08G36050/BjuVB06G37970/BjuVA06G21590	17
green	GO:0102483	scopolin beta-glucosidase activity	28/3208	177/68131	1.98614e-08	1.13396e-06	9.51256e-07	BjuVB01G44640/BjuVB04G18050/BjuVA01G31950/BjuVB08G46670/BjuVB06G04150/BjuVA01G44220/BjuVA09G44950/BjuVB06G45830/BjuVA03G52180/BjuVB04G21510/BjuVA09G18460/BjuVB02G57160/BjuVA07G25120/BjuVA03G11980/BjuVA05G19260/BjuVB07G03420/BjuVB07G47220/BjuVA05G12390/BjuVA07G07370/BjuVA03G25530/BjuVB08G10480/BjuVB06G52650/BjuVA03G35490/BjuVB08G57140/BjuVB06G04200/BjuVA04G33430/BjuVA05G12400/BjuVA04G34850	28
green	GO:1901657	glycosyl compound metabolic process	18/3208	79/68131	2.15979e-08	1.19574e-06	1.00308e-06	BjuVB04G18050/BjuVA01G31950/BjuVB06G04150/BjuVA09G44950/BjuVB06G45830/BjuVA03G52180/BjuVB04G21510/BjuVA09G18460/BjuVB02G57160/BjuVA03G11980/BjuVA07G07370/BjuVA03G25530/BjuVB08G10480/BjuVB06G52650/BjuVB08G57140/BjuVA04G33430/BjuV_Contig00272G00160/BjuVA04G34850	18
green	GO:0009808	lignin metabolic process	14/3208	50/68131	4.82742e-08	2.59403e-06	2.17607e-06	BjuVA08G37170/BjuVA09G32810/BjuVA05G24170/BjuVB06G13150/BjuVB08G15430/BjuVA05G14680/BjuVA09G67350/BjuVB02G01220/BjuVB03G32490/BjuVB04G44020/BjuVA04G23340/BjuVA05G29420/BjuVB01G34830/BjuVA09G67340	14
green	GO:0030093	chloroplast photosystem I	7/3208	10/68131	5.39554e-08	2.81647e-06	2.36268e-06	BjuVB07G49690/BjuVA05G16890/BjuVA08G00420/BjuVB06G24830/BjuV_Contig00208G00060/BjuVA04G34470/BjuVB01G00570	7
green	GO:0046274	lignin catabolic process	16/3208	67/68131	6.40317e-08	3.24961e-06	2.72603e-06	BjuVA10G17440/BjuVA05G39820/BjuVB01G12340/BjuVB02G44870/BjuVB06G07550/BjuVA02G11320/BjuVA05G07770/BjuVA02G00470/BjuVA04G29040/BjuVB05G28630/BjuVB05G28900/BjuVA04G28210/BjuVA02G00980/BjuVB06G08440/BjuVA05G08660/BjuVB01G06880	16
green	GO:0010054	trichoblast differentiation	9/3208	19/68131	6.75717e-08	3.33658e-06	2.79899e-06	BjuVA03G30440/BjuVB05G44970/BjuVB06G52690/BjuVB06G44520/BjuVB06G52700/BjuVA04G00660/BjuVA04G00650/BjuVA07G26290/BjuVA02G29390	9
green	GO:0009815	1-aminocyclopropane-1-carboxylate oxidase activity	11/3208	31/68131	8.74241e-08	4.20326e-06	3.52602e-06	BjuVB02G47490/BjuVA09G16390/BjuVB02G05050/BjuVB03G50160/BjuVA02G26000/BjuVA04G23650/BjuVB06G32180/BjuVA06G09510/BjuVA03G67180/BjuVA09G63900/BjuVB04G19830	11
green	GO:0006782	protoporphyrinogen IX biosynthetic process	15/3208	61/68131	1.08174e-07	5.06753e-06	4.25104e-06	BjuVA02G02920/BjuVB01G39670/BjuVA04G30900/BjuVA01G29520/BjuVB07G15170/BjuVA10G01980/BjuVB06G12610/BjuVA09G08230/BjuVB08G02090/BjuVB02G40740/BjuVA09G18480/BjuVB04G18040/BjuVB07G17950/BjuVA07G36370/BjuVB03G42290	15
green	GO:0031977	thylakoid lumen	22/3208	127/68131	1.23075e-07	5.62147e-06	4.71573e-06	BjuVA07G17590/BjuVB06G16160/BjuVB06G04530/BjuVA05G44830/BjuVB05G15540/BjuV_Contig00859G00130/BjuVA05G34000/BjuVA01G13040/BjuVA04G01800/BjuVB05G40540/BjuVA01G24500/BjuVB07G15970/BjuVA08G29840/BjuVB06G20030/BjuVB01G39060/BjuVA01G16830/BjuVA04G04830/BjuVB05G20350/BjuVB03G08280/BjuVA10G26630/BjuVB02G38540/BjuVB05G12160	22
green	GO:0010114	response to red light	27/3208	185/68131	1.92829e-07	8.59266e-06	7.2082e-06	BjuVA04G28740/BjuVA09G18010/BjuVA06G42460/BjuVB05G30600/BjuVB03G13740/BjuVB01G37750/BjuVA02G15770/BjuVB02G03850/BjuVA08G34530/BjuVB03G03690/BjuVA10G23020/BjuVB05G42770/BjuVB04G18460/BjuVA01G01750/BjuVA03G28380/BjuVA08G30400/BjuVB05G01580/BjuVB08G06480/BjuVA05G32730/BjuVA09G64830/BjuVA06G06790/BjuVB02G52090/BjuVB04G16060/BjuVA01G37010/BjuVB01G36030/BjuVB04G08550/BjuVA05G06250	27
green	GO:0004197	cysteine-type endopeptidase activity	23/3208	143/68131	2.59426e-07	1.1285e-05	9.46678e-06	BjuVA06G19220/BjuVB03G08510/BjuVA05G30100/BjuVB08G47840/BjuVB07G09820/BjuVB06G57530/BjuVB05G46860/BjuVB05G59710/BjuVB03G27230/BjuVA02G27170/BjuVA07G15720/BjuVA06G47250/BjuVB05G19810/BjuVB02G47190/BjuVB04G16650/BjuVB02G29190/BjuVB05G35960/BjuVA09G37480/BjuVA01G21880/BjuVB04G39000/BjuVA06G19210/BjuVB01G35420/BjuVB04G52830	23
green	GO:0009269	response to desiccation	12/3208	42/68131	3.43003e-07	1.45737e-05	1.22255e-05	BjuVB08G17230/BjuVA07G28790/BjuVB02G01240/BjuVB01G02130/BjuVA04G25680/BjuVA04G33170/BjuVA07G41740/BjuVB03G48880/BjuVB05G57850/BjuVA10G03770/BjuVB01G00910/BjuVA03G18330	12
green	GO:0005840	ribosome	45/3208	425/68131	4.47043e-07	1.85625e-05	1.55717e-05	BjuVB03G41180/BjuVA09G22870/BjuVB02G33490/BjuVA10G12320/BjuVA09G67410/BjuVA08G13390/BjuVB01G21250/BjuVA09G14410/BjuVA08G25780/BjuVA02G15020/BjuVB05G31460/BjuVA06G37170/BjuVB02G50170/BjuVA07G35340/BjuVB07G44740/BjuVB08G23100/BjuVB07G17220/BjuVB07G07090/BjuVA02G40940/BjuVA08G20100/BjuVB04G21680/BjuVB07G40210/BjuVA04G25750/BjuVB07G34800/BjuVA09G47430/BjuV_Contig00683G00410/BjuVB04G38900/BjuVA06G4434…	45
green	GO:0010319	stromule	21/3208	128/68131	6.0333e-07	2.44952e-05	2.05485e-05	BjuVA01G42050/BjuVB07G05480/BjuVA03G25520/BjuVA08G31640/BjuVB02G12700/BjuVB01G42630/BjuVA08G09600/BjuVB07G40850/BjuVA09G34430/BjuVB06G35730/BjuVA05G37900/BjuVA03G28070/BjuVA03G21850/BjuVB08G29130/BjuVA05G08540/BjuVB03G06540/BjuVA06G12470/BjuVB04G35330/BjuVA08G23410/BjuVA06G05650/BjuVB07G32050	21
green	GO:0048462	carpel formation	7/3208	13/68131	6.80491e-07	2.70273e-05	2.26727e-05	BjuVB05G40900/BjuVA01G24960/BjuVA07G17090/BjuVB07G16630/BjuVB04G00290/BjuVB06G15650/BjuVA09G44650	7
green	GO:0009627	systemic acquired resistance	26/3208	192/68131	1.38831e-06	5.3967e-05	4.52718e-05	BjuVA04G18410/BjuVA01G01950/BjuVA09G59290/BjuV_Contig00683G00560/BjuVB01G40280/BjuVA04G05620/BjuVA02G24370/BjuVB04G14470/BjuVB05G58480/BjuVB05G04360/BjuVB04G14520/BjuVB04G14500/BjuVA03G54670/BjuVA05G42780/BjuVA06G44600/BjuVA06G44640/BjuVA06G44610/BjuVA08G34960/BjuVA09G22610/BjuVB05G56840/BjuVB01G17310/BjuVB06G56450/BjuVB06G31520/BjuVA09G51650/BjuVB08G53280/BjuVB05G12000	26
green	GO:0080167	response to karrikin	40/3208	374/68131	1.46847e-06	5.58935e-05	4.68879e-05	BjuVA03G25520/BjuVB05G30600/BjuVB01G33490/BjuVA08G31460/BjuVB04G01210/BjuVB04G01960/BjuVA10G31450/BjuVB08G15430/BjuVA05G14680/BjuVA06G06680/BjuVA02G15770/BjuVB02G43270/BjuVB04G48450/BjuVA05G30030/BjuVA03G29860/BjuVA06G22340/BjuVB07G18470/BjuVA09G02270/BjuVA02G07330/BjuVB04G48460/BjuVA08G24330/BjuVA01G38050/BjuVB03G06680/BjuVB07G08660/BjuVA04G28210/BjuVB06G08440/BjuVB02G40460/BjuVB07G17910/BjuVA05…	40
green	GO:0010207	photosystem II assembly	11/3208	40/68131	1.61186e-06	6.00993e-05	5.0416e-05	BjuVA07G17590/BjuVB06G16160/BjuVA10G02070/BjuVB02G12700/BjuVB03G45720/BjuVA08G37940/BjuVA04G01800/BjuVA03G28380/BjuVB05G40540/BjuVA01G24500/BjuVA05G16040	11
green	GO:0009707	chloroplast outer membrane	26/3208	194/68131	1.69173e-06	6.07118e-05	5.09298e-05	BjuVB05G14380/BjuVB02G69190/BjuVA01G19350/BjuVB05G09870/BjuVB04G14470/BjuVB02G12700/BjuVB08G30810/BjuVB08G30540/BjuVB08G30500/BjuVA03G29180/BjuVB04G14520/BjuVB04G14500/BjuVB04G14530/BjuVA06G44600/BjuVA06G44640/BjuVA06G44610/BjuVA03G56270/BjuVA09G22610/BjuVB04G19250/BjuVA08G22260/BjuVA08G13990/BjuVB06G31520/BjuVA08G33480/BjuVB08G30480/BjuVB06G32120/BjuV_Contig00272G00160	26
green	GO:0019253	reductive pentose-phosphate cycle	18/3208	104/68131	1.69475e-06	6.07118e-05	5.09298e-05	BjuVA01G42050/BjuVB07G05480/BjuV_Contig00807G00040/BjuV_Contig00265G00120/BjuVB01G24130/BjuVA08G09600/BjuVB07G40850/BjuVA09G34430/BjuVA09G48390/BjuVA06G08500/BjuVA04G11640/BjuVB01G20050/BjuVA05G43180/BjuVA09G63250/BjuVA04G15740/BjuVB01G24290/BjuVB04G25360/BjuVB07G32050	18
green	GO:0016630	protochlorophyllide reductase activity	6/3208	10/68131	1.93322e-06	6.79228e-05	5.6979e-05	BjuVB02G69190/BjuVA01G19350/BjuVB05G09870/BjuVA08G37910/BjuVA03G56270/BjuVB06G40120	6
green	GO:0045551	cinnamyl-alcohol dehydrogenase activity	9/3208	27/68131	2.43208e-06	8.38378e-05	7.03298e-05	BjuVB01G08560/BjuVA03G62090/BjuVA06G47810/BjuVB02G75530/BjuVB02G73110/BjuVA05G30030/BjuVB04G40890/BjuVA01G01120/BjuVB06G10120	9
green	GO:0005764	lysosome	25/3208	186/68131	2.51625e-06	8.51333e-05	7.14165e-05	BjuVB05G36410/BjuVA06G19220/BjuVB03G08510/BjuVA05G30100/BjuVB08G47840/BjuVB07G09820/BjuVB05G18600/BjuVB05G46860/BjuVB03G01090/BjuVB03G27230/BjuVA07G15720/BjuVA06G47250/BjuVB05G19810/BjuVB02G47190/BjuVB04G16650/BjuVB02G29190/BjuVB05G35960/BjuVB05G18610/BjuVA09G37480/BjuVA01G21880/BjuVB04G39000/BjuVB08G50920/BjuVA06G19210/BjuVB01G35420/BjuVB04G52830	25
green	GO:0048262	determination of dorsal/ventral asymmetry	12/3208	50/68131	2.65153e-06	8.8079e-05	7.38876e-05	BjuVB01G42950/BjuVA10G31100/BjuVA08G04060/BjuVA10G14420/BjuVB08G11570/BjuVB07G45420/BjuVB02G27820/BjuVB02G25560/BjuVB05G28910/BjuVA10G16290/BjuVB02G42930/BjuVA03G11820	12
green	GO:0006783	heme biosynthetic process	11/3208	42/68131	2.73565e-06	8.92507e-05	7.48705e-05	BjuVB01G33270/BjuVB01G39670/BjuVA04G30900/BjuVA01G29520/BjuVB07G15170/BjuVA05G27690/BjuVA09G18480/BjuVB04G18040/BjuVA09G02230/BjuVA07G36370/BjuVB03G42290	11
green	GO:0080184	response to phenylpropanoid	8/3208	21/68131	2.80575e-06	8.99315e-05	7.54416e-05	BjuVA08G22340/BjuVA01G15520/BjuVB04G09300/BjuVB02G67070/BjuVA01G43780/BjuVB05G13350/BjuVA01G43770/BjuVA09G23450	8
green	GO:0016722	oxidoreductase activity, acting on metal ions	15/3208	78/68131	3.14549e-06	9.9083e-05	8.31186e-05	BjuVA10G17440/BjuVA05G39820/BjuVB01G12340/BjuVB02G44870/BjuVB06G07550/BjuVA02G11320/BjuVA05G07770/BjuVA02G00470/BjuVA02G42980/BjuVA04G29040/BjuVB05G28630/BjuVB05G28900/BjuVA02G00980/BjuVA07G37560/BjuVB08G30440	15
green	GO:0019898	extrinsic component of membrane	18/3208	110/68131	3.89081e-06	0.000120483	0.000101071	BjuVA07G17590/BjuVB06G16160/BjuVB05G15540/BjuVA05G42600/BjuVB08G26050/BjuVA10G05220/BjuVA08G36600/BjuVA01G13040/BjuVB05G50250/BjuVB05G40540/BjuVA01G24500/BjuVA09G54620/BjuV_Contig00859G00100/BjuVA04G04830/BjuVB05G20350/BjuV_Contig01019_ERROPOS2684367G00130/BjuVA10G26630/BjuVB02G38540	18
green	GO:0031418	L-ascorbic acid binding	18/3208	111/68131	4.44057e-06	0.000135215	0.000113429	BjuVB08G47700/BjuVA07G03210/BjuVB08G50440/BjuVA09G16390/BjuVA01G14590/BjuVB05G14020/BjuVB02G05050/BjuVB03G50160/BjuVA02G26000/BjuVB06G32180/BjuVA06G09510/BjuVA03G67180/BjuVA09G63900/BjuVA09G44350/BjuVB02G40460/BjuVB07G17910/BjuVB04G19830/BjuVB03G23310	18
green	GO:0009610	response to symbiotic fungus	10/3208	37/68131	5.70443e-06	0.000170852	0.000143324	BjuVB01G44640/BjuVA01G44220/BjuVA04G27490/BjuVA03G19480/BjuVB07G03420/BjuVB08G18480/BjuVA03G35490/BjuVA07G35480/BjuVB02G34670/BjuVA02G07080	10
green	GO:0042549	photosystem II stabilization	8/3208	23/68131	6.21179e-06	0.000183048	0.000153555	BjuVB06G19790/BjuVA07G17590/BjuVB06G16160/BjuVA04G23430/BjuVB01G12040/BjuVA05G14610/BjuVB05G40540/BjuVA01G24500	8
green	GO:0006796	phosphate-containing compound metabolic process	9/3208	30/68131	6.52968e-06	0.000189361	0.000158851	BjuVA04G34510/BjuVB02G40050/BjuVB01G00540/BjuVA09G00960/BjuVA02G29240/BjuVB08G35780/BjuVB05G48350/BjuVB06G00560/BjuV_Contig00937G00380	9
green	GO:0016799	hydrolase activity, hydrolyzing N-glycosyl compounds	10/3208	38/68131	7.4148e-06	0.000211669	0.000177565	BjuVA04G27560/BjuVA02G02210/BjuVB01G13780/BjuVA05G08560/BjuVB06G17610/BjuVA07G19030/BjuVA10G30600/BjuVB06G08350/BjuVA10G26250/BjuVA02G04620	10
green	GO:0052716	hydroquinone:oxygen oxidoreductase activity	12/3208	55/68131	7.69958e-06	0.000216417	0.000181548	BjuVA10G17440/BjuVA05G39820/BjuVB01G12340/BjuVB02G44870/BjuVB06G07550/BjuVA02G11320/BjuVA05G07770/BjuVA02G00470/BjuVA04G29040/BjuVB05G28630/BjuVB05G28900/BjuVA02G00980	12
green	GO:0010500	transmitting tissue development	7/3208	19/68131	1.55556e-05	0.000430607	0.000361227	BjuVB05G40900/BjuVA01G24960/BjuVA07G17090/BjuVB07G16630/BjuVB04G00290/BjuVB06G15650/BjuVA09G44650	7
green	GO:0009699	phenylpropanoid biosynthetic process	17/3208	112/68131	1.98792e-05	0.00054208	0.000454739	BjuVA07G19390/BjuVB06G18120/BjuVA04G22100/BjuVA06G00390/BjuVA03G42990/BjuVB06G25170/BjuVA05G17150/BjuVB07G06110/BjuVB07G27300/BjuVB07G49220/BjuVA06G00370/BjuVB01G40920/BjuVB06G56090/BjuVB08G21060/BjuVA03G21730/BjuVB07G06100/BjuVA03G65800	17
green	GO:0004427	inorganic diphosphatase activity	11/3208	51/68131	2.05867e-05	0.000553117	0.000463998	BjuVA04G34510/BjuVB02G40050/BjuVB01G00540/BjuVA09G00960/BjuVA02G29240/BjuVB08G35780/BjuVB05G48350/BjuVB06G00560/BjuVB03G25820/BjuV_Contig00937G00380/BjuVA07G39110	11
green	GO:0001046	core promoter sequence-specific DNA binding	18/3208	124/68131	2.14104e-05	0.00056691	0.000475569	BjuVB05G33750/BjuVB03G16840/BjuVB06G03230/BjuVB01G02790/BjuVB06G37990/BjuVA09G16890/BjuVB02G26910/BjuVB02G72850/BjuVB03G16850/BjuVA10G04440/BjuVA10G15550/BjuVA03G61560/BjuVB05G04260/BjuVA08G26480/BjuVA03G12310/BjuVA02G12710/BjuVA04G32500/BjuVA01G07090	18
green	GO:0016762	xyloglucan:xyloglucosyl transferase activity	16/3208	102/68131	2.27217e-05	0.000593037	0.000497486	BjuVA01G27490/BjuVB06G08610/BjuVA01G07780/BjuVB08G45160/BjuVA09G02200/BjuVB02G70900/BjuVA04G28080/BjuVA07G05840/BjuVB03G57360/BjuVB05G43560/BjuVB05G07420/BjuVA01G07800/BjuVA06G21590/BjuVB02G08380/BjuVA03G12620/BjuVA03G64910	16
green	GO:0080150	S-adenosyl-L-methionine:benzoic acid carboxyl methyl transferase activity	8/3208	27/68131	2.37531e-05	0.000611223	0.000512742	BjuVB08G00030/BjuVB08G50200/BjuVA01G24800/BjuVB02G44030/BjuVA09G05280/BjuVA10G32280/BjuVA10G32270/BjuVA03G01580	8
green	GO:0008515	sucrose transmembrane transporter activity	10/3208	43/68131	2.42446e-05	0.000615207	0.000516084	BjuVA06G26590/BjuVA10G25480/BjuVA02G05060/BjuVB07G19630/BjuVB06G23080/BjuVA06G33570/BjuVA01G38950/BjuVB08G48080/BjuVA06G18830/BjuVB02G63190	10
green	GO:0010417	glucuronoxylan biosynthetic process	10/3208	44/68131	3.00539e-05	0.000752171	0.000630981	BjuVB01G36160/BjuVA04G21650/BjuVB03G09190/BjuVA08G17770/BjuVA06G14920/BjuVA05G08630/BjuVB06G08410/BjuVB03G17090/BjuVA05G31000/BjuVA10G12470	10
green	GO:0010315	auxin efflux	8/3208	28/68131	3.18807e-05	0.000787109	0.000660289	BjuVA07G29010/BjuVA06G12610/BjuVA07G41100/BjuVB05G57260/BjuVA07G37460/BjuVA07G31100/BjuVB03G48070/BjuVB06G41400	8
green	GO:0080170	hydrogen peroxide transmembrane transport	7/3208	21/68131	3.30311e-05	0.000804636	0.000674992	BjuVA03G10870/BjuVA06G41070/BjuVB02G53410/BjuVB04G07640/BjuVA04G28060/BjuVB08G52480/BjuVB08G18960	7
green	GO:0042546	cell wall biogenesis	22/3208	179/68131	4.01664e-05	0.00096558	0.000810005	BjuVA05G11540/BjuVB04G20610/BjuVA01G27490/BjuVA02G11970/BjuVA09G15530/BjuVB06G08610/BjuVA01G07780/BjuVB08G45160/BjuVA09G02200/BjuVB02G70900/BjuVA04G28080/BjuVA07G05840/BjuVB03G57360/BjuVB05G43560/BjuVB05G07420/BjuVA01G07800/BjuVA01G29780/BjuVA06G21590/BjuVA09G14720/BjuVB02G08380/BjuVA03G12620/BjuVA03G64910	22
green	GO:0052624	2-phytyl-1,4-naphthoquinone methyltransferase activity	8/3208	29/68131	4.22084e-05	0.00100149	0.000840129	BjuVB08G00030/BjuVB08G50200/BjuVA01G24800/BjuVB02G44030/BjuVA09G05280/BjuVA10G32280/BjuVA10G32270/BjuVA03G01580	8
green	GO:0006163	purine nucleotide metabolic process	7/3208	22/68131	4.64733e-05	0.00108855	0.000913159	BjuVB07G49680/BjuVB07G18080/BjuVA02G31310/BjuVB08G41150/BjuVA03G50590/BjuVB05G47190/BjuVA06G28970	7
green	GO:0042550	photosystem I stabilization	5/3208	10/68131	4.76403e-05	0.00110176	0.00092424	BjuVB07G49690/BjuVA05G16890/BjuVA08G00420/BjuVB06G24830/BjuV_Contig00208G00060	5
green	GO:0015770	sucrose transport	9/3208	38/68131	5.28794e-05	0.00120763	0.00101306	BjuVA06G26590/BjuVA10G25480/BjuVA02G05060/BjuVB07G19630/BjuVB06G23080/BjuVA06G33570/BjuVB08G48080/BjuVA06G18830/BjuVB02G63190	9
green	GO:0080147	root hair cell development	12/3208	67/68131	6.23518e-05	0.00140638	0.00117978	BjuVB05G33750/BjuVA09G07060/BjuVA07G03210/BjuV_Contig00886G00100/BjuVA09G53410/BjuVB02G26910/BjuVA10G15550/BjuVB07G19020/BjuVA03G12310/BjuVA02G12710/BjuVA01G07090/BjuVB03G23310	12
green	GO:0016788	hydrolase activity, acting on ester bonds	30/3208	294/68131	6.76436e-05	0.00150219	0.00126015	BjuVA09G66440/BjuVA04G18410/BjuVA01G01950/BjuVA02G35020/BjuVB04G47400/BjuVA03G66340/BjuVA08G25460/BjuVB07G04340/BjuVB01G43280/BjuVB04G38770/BjuVB07G25390/BjuVA04G30470/BjuVA05G24160/BjuVB01G47550/BjuVB07G06550/BjuVA05G42780/BjuVB03G32500/BjuVA02G34990/BjuVB01G17310/BjuVB04G38760/BjuVA08G01290/BjuVB03G15940/BjuV_Contig00694G00240/BjuVB04G11070/BjuVB03G16330/BjuVA03G22780/BjuVA02G47140/BjuVB04G4694…	30
green	GO:0000156	phosphorelay response regulator activity	13/3208	78/68131	6.82439e-05	0.00150219	0.00126015	BjuVA09G18010/BjuVB02G03850/BjuVA08G34530/BjuVB03G03690/BjuVA09G47290/BjuVB05G42770/BjuVB04G18460/BjuVA05G02180/BjuVA04G31390/BjuVB08G22340/BjuVB01G03880/BjuVA09G64830/BjuVA06G06790	13
green	GO:0009643	photosynthetic acclimation	8/3208	31/68131	7.131e-05	0.00155099	0.0013011	BjuVA03G66570/BjuVB04G10930/BjuVA01G30810/BjuVB04G19200/BjuVA06G07500/BjuVB02G46310/BjuVB07G14000/BjuVA09G17170	8
green	GO:0010053	root epidermal cell differentiation	14/3208	90/68131	7.9465e-05	0.00170803	0.00143283	BjuVB02G68840/BjuVA01G03910/BjuVA03G55780/BjuVB03G19750/BjuVB08G14700/BjuVA08G36950/BjuVA09G04410/BjuVA08G16860/BjuVB03G01390/BjuVA10G04450/BjuVA01G37010/BjuVB06G37970/BjuVA09G14720/BjuVB01G36030	14
green	GO:0015200	methylammonium transmembrane transporter activity	5/3208	11/68131	8.39385e-05	0.00178321	0.00149589	BjuVA03G39030/BjuVB07G29830/BjuVB01G38360/BjuVB07G07850/BjuVA05G33390	5
green	GO:0045431	flavonol synthase activity	6/3208	17/68131	8.55894e-05	0.00179738	0.00150778	BjuVB08G47700/BjuVA06G29220/BjuVB04G01620/BjuVA02G47930/BjuVB02G40460/BjuVB07G17910	6
green	GO:0051119	sugar transmembrane transporter activity	13/3208	80/68131	8.93661e-05	0.00185536	0.00155642	BjuVA06G26590/BjuVA10G25480/BjuVA02G05060/BjuVB07G19630/BjuVB06G23080/BjuVA06G33570/BjuVA01G38950/BjuVB02G03080/BjuVB04G28530/BjuVB08G48080/BjuVA06G18830/BjuVB02G63190/BjuVA06G05370	13
green	GO:0006040	amino sugar metabolic process	10/3208	50/68131	9.61506e-05	0.00197379	0.00165577	BjuVB08G23550/BjuVB08G23590/BjuVA03G23850/BjuVA08G36950/BjuVB08G27410/BjuVB03G01390/BjuVA10G04450/BjuVB08G18100/BjuVB08G36050/BjuVB06G37970	10
green	GO:0010411	xyloglucan metabolic process	18/3208	140/68131	0.000108865	0.00220997	0.00185389	BjuVA01G27490/BjuVB06G08610/BjuVA01G07780/BjuVB08G45160/BjuVA09G02200/BjuVB02G70900/BjuVA04G28080/BjuVA07G05840/BjuVB03G57360/BjuVB05G43560/BjuVB05G07420/BjuVA01G07800/BjuVA07G32150/BjuVA06G21590/BjuVB02G08380/BjuVA03G12620/BjuVA03G64910/BjuVA07G36860	18
green	GO:0004550	nucleoside diphosphate kinase activity	6/3208	18/68131	0.000123263	0.00244784	0.00205344	BjuVB07G49680/BjuVB07G18080/BjuVA02G31310/BjuVB08G41150/BjuVB05G47190/BjuVA06G28970	6
green	GO:0006228	UTP biosynthetic process	6/3208	18/68131	0.000123263	0.00244784	0.00205344	BjuVB07G49680/BjuVB07G18080/BjuVA02G31310/BjuVB08G41150/BjuVB05G47190/BjuVA06G28970	6
green	GO:0102336	3-oxo-arachidoyl-CoA synthase activity	12/3208	72/68131	0.000128518	0.0024716	0.00207337	BjuVA03G62110/BjuVB02G43610/BjuVA10G02610/BjuVB05G03950/BjuVB06G18090/BjuVB02G73130/BjuVA01G04220/BjuVB06G39690/BjuVA07G05110/BjuVA05G41680/BjuVB04G36850/BjuVB03G53240	12
green	GO:0102337	3-oxo-cerotoyl-CoA synthase activity	12/3208	72/68131	0.000128518	0.0024716	0.00207337	BjuVA03G62110/BjuVB02G43610/BjuVA10G02610/BjuVB05G03950/BjuVB06G18090/BjuVB02G73130/BjuVA01G04220/BjuVB06G39690/BjuVA07G05110/BjuVA05G41680/BjuVB04G36850/BjuVB03G53240	12
green	GO:0102338	3-oxo-lignoceronyl-CoA synthase activity	12/3208	72/68131	0.000128518	0.0024716	0.00207337	BjuVA03G62110/BjuVB02G43610/BjuVA10G02610/BjuVB05G03950/BjuVB06G18090/BjuVB02G73130/BjuVA01G04220/BjuVB06G39690/BjuVA07G05110/BjuVA05G41680/BjuVB04G36850/BjuVB03G53240	12
green	GO:0009691	cytokinin biosynthetic process	11/3208	62/68131	0.000136493	0.00259764	0.00217911	BjuVA04G27560/BjuVA02G02210/BjuVB01G13780/BjuVA05G08560/BjuVB06G17610/BjuVA07G19030/BjuVB05G38110/BjuVA10G30600/BjuVB06G08350/BjuVA10G26250/BjuVA02G04620	11
green	GO:0007623	circadian rhythm	31/3208	322/68131	0.000150572	0.00283081	0.00237471	BjuVA10G22360/BjuVA09G18010/BjuVA05G01960/BjuVB03G13740/BjuVB02G25570/BjuVB02G03850/BjuVA08G34530/BjuVA02G21140/BjuVB03G03690/BjuVA09G47290/BjuVB05G42770/BjuVB04G18460/BjuVA05G02180/BjuVA01G01750/BjuVA04G31390/BjuVB08G22340/BjuVB02G34030/BjuVA01G34440/BjuVB01G03880/BjuVB05G01580/BjuVB06G45440/BjuVA09G64830/BjuVA06G06790/BjuVA01G03820/BjuVB04G08750/BjuVB05G11950/BjuVA08G23410/BjuVA06G05650/BjuVB05…	31
green	GO:0009538	photosystem I reaction center	7/3208	26/68131	0.000151844	0.00283081	0.00237471	BjuVA08G10920/BjuVB04G41560/BjuVA06G01480/BjuVB07G37380/BjuVA09G35090/BjuVA07G09870/BjuVA08G20280	7
green	GO:0006032	chitin catabolic process	12/3208	74/68131	0.000168295	0.0031058	0.00260539	BjuVA09G00690/BjuVB08G23550/BjuVB08G23590/BjuVA03G23850/BjuVA08G36950/BjuVA09G19220/BjuVB08G27410/BjuVB03G01390/BjuVA10G04450/BjuVB08G18100/BjuVB08G36050/BjuVB06G37970	12
green	GO:0052747	sinapyl alcohol dehydrogenase activity	6/3208	19/68131	0.000172974	0.00316023	0.00265105	BjuVA03G62090/BjuVA06G47810/BjuVB02G75530/BjuVB02G73110/BjuVA05G30030/BjuVA01G01120	6
green	GO:0004356	glutamate-ammonia ligase activity	8/3208	35/68131	0.000179826	0.00322101	0.00270203	BjuVA08G10180/BjuVA04G10150/BjuVB01G26050/BjuVB05G50180/BjuVA02G18400/BjuVA05G32070/BjuVA10G22870/BjuVB02G34680	8
green	GO:0006542	glutamine biosynthetic process	8/3208	35/68131	0.000179826	0.00322101	0.00270203	BjuVA08G10180/BjuVA04G10150/BjuVB01G26050/BjuVB05G50180/BjuVA02G18400/BjuVA05G32070/BjuVA10G22870/BjuVB02G34680	8
green	GO:0004784	superoxide dismutase activity	7/3208	27/68131	0.000196676	0.00348861	0.00292652	BjuVB02G03010/BjuVA09G06760/BjuVB08G14670/BjuVA09G65550/BjuVA01G43220/BjuVB05G11950/BjuVB07G19410	7
green	GO:0005355	glucose transmembrane transporter activity	20/3208	173/68131	0.000204071	0.00358499	0.00300737	BjuVA08G08260/BjuVB01G34170/BjuVB03G50040/BjuVA05G28640/BjuVB04G32400/BjuVB01G34160/BjuVA06G16590/BjuVA05G42800/BjuVB07G09460/BjuVA02G44080/BjuVB04G28550/BjuVA03G07190/BjuVB01G47140/BjuVA01G38950/BjuVB02G03080/BjuVB02G62080/BjuVB04G28530/BjuVA08G35510/BjuVB04G04670/BjuVA06G05370	20
green	GO:0009416	response to light stimulus	42/3208	496/68131	0.000210281	0.00365889	0.00306937	BjuVB04G34190/BjuVA04G28740/BjuVB01G20810/BjuVA03G62110/BjuVA09G06020/BjuVB02G43610/BjuVA08G31640/BjuVB07G20130/BjuVB02G25570/BjuVB05G03950/BjuVB07G40850/BjuVB06G35730/BjuVA06G29220/BjuVA01G25760/BjuVB04G01620/BjuVA09G61100/BjuVA10G23020/BjuVB04G22270/BjuVB02G73130/BjuVA03G21850/BjuVA07G37460/BjuVA02G47930/BjuVB03G06260/BjuVA08G25310/BjuVA09G05290/BjuVA01G04220/BjuVA08G27970/BjuVB08G06480/BjuVA02…	42
green	GO:0006536	glutamate metabolic process	9/3208	45/68131	0.000213486	0.00367962	0.00308675	BjuVA03G07960/BjuVA10G22330/BjuVB02G33980/BjuVB04G08990/BjuVB06G20050/BjuVA09G13190/BjuVA07G33270/BjuVB03G38880/BjuVA05G14400	9
green	GO:0080158	obsolete chloroplast ribulose bisphosphate carboxylase complex biogenesis	5/3208	13/68131	0.000216	0.00368815	0.00309391	BjuVA09G47430/BjuVB08G55680/BjuVA01G44640/BjuVA07G23350/BjuVB06G55180	5
green	GO:0006855	drug transmembrane transport	24/3208	229/68131	0.000230305	0.00389598	0.00326826	BjuVB02G05860/BjuVB03G05150/BjuVA08G32980/BjuVA02G03790/BjuVA09G18450/BjuVA03G18730/BjuVB04G18070/BjuVB08G02710/BjuVB02G39400/BjuVA06G22990/BjuVA06G10890/BjuVB03G04350/BjuVB05G00030/BjuVA03G26890/BjuVA02G03770/BjuVB08G44160/BjuVB04G43300/BjuVB08G02720/BjuVA08G08870/BjuVA08G33840/BjuVB01G29880/BjuVA01G00240/BjuVB01G06710/BjuVB01G32680	24
green	GO:0003997	acyl-CoA oxidase activity	6/3208	20/68131	0.000237267	0.00397695	0.00333618	BjuVB06G14160/BjuVA10G04930/BjuV_Contig00683G00250/BjuVB06G37590/BjuVA06G30910/BjuVA04G07830	6
green	GO:0030308	negative regulation of cell growth	8/3208	37/68131	0.000271246	0.00450516	0.00377928	BjuVB03G34470/BjuVB05G00890/BjuVA08G23600/BjuVA01G01030/BjuVB03G00180/BjuVA10G01460/BjuVB03G14240/BjuVB05G18610	8
green	GO:0015293	symporter activity	29/3208	304/68131	0.00028115	0.00462757	0.00388197	BjuVA07G43180/BjuVA02G48100/BjuVA03G09400/BjuVA02G08860/BjuVA07G28100/BjuVB04G18090/BjuVB03G36980/BjuVB06G42390/BjuVA03G03740/BjuVB08G02390/BjuVB04G01500/BjuVA09G01790/BjuVB03G04690/BjuVB07G22720/BjuVA06G47060/BjuVB04G16490/BjuVB06G12850/BjuVA09G65000/BjuVA07G28670/BjuVB06G16560/BjuVB01G05570/BjuVA08G33450/BjuVB08G37090/BjuVA02G26230/BjuVB02G40330/BjuVA04G29610/BjuVA09G18420/BjuVA07G26980/BjuVA09…	29
green	GO:0004089	carbonate dehydratase activity	11/3208	68/68131	0.000317848	0.0051849	0.00434951	BjuVB04G20320/BjuVA02G21600/BjuV_Contig00518_ERROPOS2626043G00040/BjuVA07G36940/BjuVB04G52140/BjuVB03G42890/BjuVB08G15640/BjuVB08G26210/BjuVA03G16990/BjuVB06G49730/BjuVB04G52150	11
green	GO:0022857	transmembrane transporter activity	23/3208	224/68131	0.000411617	0.00665509	0.00558281	BjuVA07G20560/BjuVB04G51320/BjuVA09G18450/BjuVA07G29010/BjuVB04G15260/BjuVB04G18070/BjuVA03G30910/BjuVA09G00930/BjuVB04G06820/BjuVA07G41100/BjuVB05G57260/BjuVA05G08350/BjuVB05G48330/BjuVB07G09040/BjuVA09G21570/BjuVB08G33390/BjuVA09G65300/BjuVB03G48070/BjuVB01G22230/BjuVA09G19760/BjuVA09G17920/BjuVB06G41400/BjuVA04G16070	23
green	GO:0006220	pyrimidine nucleotide metabolic process	6/3208	22/68131	0.000421145	0.00669072	0.0056127	BjuVB07G49680/BjuVB07G18080/BjuVA02G31310/BjuVB08G41150/BjuVB05G47190/BjuVA06G28970	6
green	GO:1990538	xylan O-acetyltransferase activity	6/3208	22/68131	0.000421145	0.00669072	0.0056127	BjuVB06G48200/BjuVA07G22990/BjuVA09G48230/BjuV_Contig00580_ERROPOS930405+G00100/BjuVA04G29230/BjuVA03G00360	6
green	GO:0051603	proteolysis involved in cellular protein catabolic process	24/3208	239/68131	0.000432645	0.00681417	0.00571626	BjuVA06G19220/BjuVB03G08510/BjuVA05G30100/BjuVB08G47840/BjuVA04G21530/BjuVA04G27300/BjuVB07G09820/BjuVB05G46860/BjuVB03G27230/BjuVA07G15720/BjuVA06G47250/BjuVB05G19810/BjuVB02G47190/BjuVA02G46330/BjuVA08G07460/BjuVB04G16650/BjuVB02G29190/BjuVB05G35960/BjuVA09G37480/BjuVA01G21880/BjuVB04G39000/BjuVA06G19210/BjuVB01G35420/BjuVB04G52830	24
green	GO:0045486	naringenin 3-dioxygenase activity	5/3208	15/68131	0.000465664	0.00720989	0.00604823	BjuVB08G47700/BjuVB08G50440/BjuVA09G44350/BjuVB02G40460/BjuVB07G17910	5
green	GO:0080116	glucuronoxylan glucuronosyltransferase activity	5/3208	15/68131	0.000465664	0.00720989	0.00604823	BjuVB01G36160/BjuVB03G09190/BjuVA08G17770/BjuVB03G17090/BjuVA05G31000	5
green	GO:0042807	central vacuole	7/3208	31/68131	0.000493665	0.00757921	0.00635804	BjuVA03G39030/BjuVB07G29830/BjuVB01G38360/BjuVA04G28060/BjuVB07G07850/BjuVA05G33390/BjuVB08G18960	7
green	GO:0009295	nucleoid	11/3208	72/68131	0.000527545	0.0079655	0.00668209	BjuVB02G54550/BjuV_Contig00342G00150/BjuVB07G17220/BjuVA04G34470/BjuVA02G41390/BjuVA09G06760/BjuVB08G14670/BjuVB01G00570/BjuVA09G03160/BjuVB07G19410/BjuVB04G00760	11
green	GO:0071365	cellular response to auxin stimulus	11/3208	72/68131	0.000527545	0.0079655	0.00668209	BjuVA03G30440/BjuVB05G44970/BjuVA07G25060/BjuVB06G52690/BjuVB06G44520/BjuVB06G52700/BjuVA04G00660/BjuVA04G00650/BjuVA07G26290/BjuVB06G45900/BjuVA02G29390	11
green	GO:0008757	S-adenosylmethionine-dependent methyltransferase activity	25/3208	257/68131	0.000534406	0.00799737	0.00670883	BjuVB06G55550/BjuVA07G09290/BjuVB04G43440/BjuVB03G42000/BjuVB05G58660/BjuVA02G28700/BjuVB08G00030/BjuVB08G50200/BjuVA02G26110/BjuVA04G33110/BjuVA01G24800/BjuVB02G44030/BjuVA09G05280/BjuVA06G46510/BjuVB01G30370/BjuVA02G17720/BjuVA10G32280/BjuVB04G32680/BjuVB07G39490/BjuVA10G32270/BjuVA07G15550/BjuVA07G28230/BjuVA03G42530/BjuVA03G01580/BjuVA09G33420	25
green	GO:0004351	glutamate decarboxylase activity	6/3208	23/68131	0.000547166	0.00799737	0.00670883	BjuVA03G07960/BjuVA10G22330/BjuVB02G33980/BjuVB04G08990/BjuVA07G33270/BjuVB03G38880	6
green	GO:0006183	GTP biosynthetic process	6/3208	23/68131	0.000547166	0.00799737	0.00670883	BjuVB07G49680/BjuVB07G18080/BjuVA02G31310/BjuVB08G41150/BjuVB05G47190/BjuVA06G28970	6
green	GO:0047763	caffeate O-methyltransferase activity	6/3208	23/68131	0.000547166	0.00799737	0.00670883	BjuVA02G15400/BjuVB05G20210/BjuVA01G22430/BjuVB08G13030/BjuVA03G14520/BjuVA10G11980	6
green	GO:0010233	phloem transport	8/3208	41/68131	0.000567782	0.00823284	0.00690636	BjuVA06G14580/BjuVB03G24170/BjuVA01G18390/BjuVB04G28280/BjuVA06G42930/BjuVA08G30550/BjuVB02G51630/BjuVA03G42910	8
green	GO:0080030	methyl indole-3-acetate esterase activity	5/3208	16/68131	0.000651109	0.00936674	0.00785756	BjuVA04G18410/BjuVA01G01950/BjuVB07G04340/BjuVB01G43280/BjuVB01G17310	5
green	GO:0042372	phylloquinone biosynthetic process	8/3208	42/68131	0.00067267	0.00960131	0.00805433	BjuVB03G07600/BjuVA02G24370/BjuVB07G44670/BjuVB04G18730/BjuVB05G56840/BjuVA09G17670/BjuVA05G21680/BjuVB04G40550	8
green	GO:0009142	nucleoside triphosphate biosynthetic process	6/3208	24/68131	0.000700621	0.00992275	0.00832398	BjuVB07G49680/BjuVB07G18080/BjuVA02G31310/BjuVB08G41150/BjuVB05G47190/BjuVA06G28970	6
green	GO:0050829	defense response to Gram-negative bacterium	8/3208	43/68131	0.000792619	0.011089	0.00930235	BjuVB01G40210/BjuVB07G12720/BjuVB03G23890/BjuVA05G35270/BjuVA07G08950/BjuVA01G32500/BjuVB05G04790/BjuVB03G09230	8
green	GO:0005901	caveola	4/3208	10/68131	0.000819387	0.011089	0.00930235	BjuVA02G48620/BjuVB04G00990/BjuVB06G13930/BjuVA06G30650	4
green	GO:0010226	response to lithium ion	4/3208	10/68131	0.000819387	0.011089	0.00930235	BjuVB07G25390/BjuVB01G47550/BjuV_Contig00694G00240/BjuVA03G32870	4
green	GO:0033481	galacturonate biosynthetic process	4/3208	10/68131	0.000819387	0.011089	0.00930235	BjuVB07G12720/BjuVB03G23890/BjuVA07G08950/BjuVA01G32500	4
green	GO:0047100	glyceraldehyde-3-phosphate dehydrogenase (NADP+) (phosphorylating) activity	4/3208	10/68131	0.000819387	0.011089	0.00930235	BjuVB07G40850/BjuVA06G08500/BjuVA09G63250/BjuVB04G25360	4
green	GO:0071398	cellular response to fatty acid	4/3208	10/68131	0.000819387	0.011089	0.00930235	BjuVB02G05050/BjuVB06G32180/BjuVA06G09510/BjuVA09G63900	4
green	GO:2000122	negative regulation of stomatal complex development	5/3208	17/68131	0.000886742	0.0119123	0.009993	BjuVA06G15940/BjuVA02G21600/BjuV_Contig00518_ERROPOS2626043G00040/BjuVA07G36940/BjuVB03G42890	5
green	GO:0046323	glucose import	19/3208	180/68131	0.000899725	0.0119985	0.0100653	BjuVA08G08260/BjuVB01G34170/BjuVB03G50040/BjuVA05G28640/BjuVB04G32400/BjuVB01G34160/BjuVA06G16590/BjuVA05G42800/BjuVB07G09460/BjuVA02G44080/BjuVB04G28550/BjuVA03G07190/BjuVB01G47140/BjuVB02G03080/BjuVB02G62080/BjuVB04G28530/BjuVA08G35510/BjuVB04G04670/BjuVA06G05370	19
green	GO:0046914	transition metal ion binding	18/3208	167/68131	0.000951688	0.0125995	0.0105695	BjuVB08G48280/BjuVB06G48130/BjuVB06G50130/BjuVB08G55120/BjuVB03G24170/BjuVA02G45720/BjuVA03G33350/BjuVA06G34330/BjuVA01G03520/BjuVB01G46510/BjuVA05G42190/BjuVB07G02030/BjuVA07G23100/BjuVA09G69160/BjuVA03G33930/BjuVB02G63860/BjuV_Contig00453G00130/BjuVA03G42910	18
green	GO:0051260	protein homooligomerization	14/3208	114/68131	0.000961399	0.0126365	0.0106005	BjuVB05G16280/BjuVB08G13790/BjuVA06G26590/BjuVB02G64700/BjuVA01G12200/BjuVB07G19630/BjuVB06G23080/BjuVA06G33570/BjuVA01G38950/BjuVA03G15260/BjuVA06G35380/BjuVB08G48080/BjuVA06G18830/BjuVB02G63190	14
green	GO:0019432	triglyceride biosynthetic process	13/3208	102/68131	0.00101741	0.0132771	0.0111379	BjuVB02G53630/BjuVA02G40560/BjuVB08G03870/BjuVB05G04210/BjuVB02G72920/BjuVA03G19270/BjuVB04G07470/BjuVB04G07480/BjuVB03G58010/BjuVA01G25700/BjuVA06G40860/BjuVB05G41790/BjuVB03G44770	13
green	GO:0006508	proteolysis	30/3208	345/68131	0.00102884	0.0133311	0.0111832	BjuVA06G15940/BjuVB01G22250/BjuVA04G05620/BjuVA02G03990/BjuVB03G33090/BjuVB02G21900/BjuVA03G26830/BjuVB01G34600/BjuVB08G50540/BjuVB06G57840/BjuVB02G14810/BjuVA09G57080/BjuVB05G39150/BjuVA03G45320/BjuVB02G57570/BjuVA08G34960/BjuVA09G44510/BjuVB08G50530/BjuVB02G36950/BjuVA10G25170/BjuVB06G20030/BjuVB06G56450/BjuVA09G25880/BjuVB01G25710/BjuVA03G26640/BjuVA07G44670/BjuVA10G00060/BjuVB05G19390/BjuVB08…	30
green	GO:0007267	cell-cell signaling	15/3208	128/68131	0.00105029	0.0135132	0.011336	BjuVB07G21260/BjuVB03G34470/BjuVB08G48230/BjuVB02G55540/BjuVA02G23370/BjuVB07G16640/BjuVA07G30280/BjuVB03G35390/BjuVA08G07200/BjuVA09G13530/BjuVB07G41370/BjuVB03G00180/BjuVA10G01460/BjuVA09G09470/BjuVA09G05090	15
green	GO:0009772	photosynthetic electron transport in photosystem II	7/3208	35/68131	0.0010707	0.0136795	0.0114754	BjuVA09G00690/BjuVA03G29500/BjuVB08G31180/BjuVA03G28070/BjuVA09G25710/BjuVB08G29130/BjuVB08G38940	7
green	GO:0070417	cellular response to cold	14/3208	116/68131	0.001141	0.0144434	0.0121163	BjuVB01G44640/BjuVA01G44220/BjuVB04G14470/BjuVA10G03710/BjuVB04G14520/BjuVB04G14500/BjuVA06G44600/BjuVA06G44640/BjuVA06G44610/BjuVA09G22610/BjuVB07G03420/BjuVA03G35490/BjuVB06G31520/BjuVB06G43150	14
green	GO:0009768	photosynthesis, light harvesting in photosystem I	9/3208	56/68131	0.0011463	0.0144434	0.0121163	BjuVB02G02800/BjuVB07G42980/BjuVA09G61100/BjuVA09G65800/BjuVB03G06260/BjuVA03G28380/BjuVA08G25310/BjuVA08G30400/BjuVA05G06250	9
green	GO:0010037	response to carbon dioxide	5/3208	18/68131	0.00118039	0.0145714	0.0122236	BjuVA06G15940/BjuVA02G21600/BjuV_Contig00518_ERROPOS2626043G00040/BjuVA07G36940/BjuVB03G42890	5
green	GO:0010196	nonphotochemical quenching	5/3208	18/68131	0.00118039	0.0145714	0.0122236	BjuVA03G29860/BjuVA03G28380/BjuVA09G02270/BjuVB08G31810/BjuVB08G37680	5
green	GO:0048564	photosystem I assembly	5/3208	18/68131	0.00118039	0.0145714	0.0122236	BjuVA06G46210/BjuVB02G48390/BjuVB06G20030/BjuVB05G20350/BjuVA05G16040	5
green	GO:0006633	fatty acid biosynthetic process	37/3208	460/68131	0.00122657	0.0150399	0.0126167	BjuVA03G62110/BjuVB02G34890/BjuVA07G09290/BjuVB02G43610/BjuVB04G05460/BjuVB03G46310/BjuVA10G23070/BjuVB07G15650/BjuVA07G39620/BjuVA10G02610/BjuVB08G02640/BjuVB07G25970/BjuVB05G14140/BjuVB05G03950/BjuVB05G58480/BjuVB06G18090/BjuVA03G54670/BjuVA10G23720/BjuVB02G73130/BjuVA01G04220/BjuVB01G30370/BjuVA02G43260/BjuVB06G39690/BjuVA07G05110/BjuVA05G41680/BjuVB02G21650/BjuVA02G47800/BjuVB04G27190/BjuVA03…	37
green	GO:0046906	tetrapyrrole binding	4/3208	11/68131	0.00123964	0.0150988	0.0126661	BjuVA07G24870/BjuVB08G58000/BjuVB06G46140/BjuVA09G45730	4
green	GO:0043085	positive regulation of catalytic activity	8/3208	46/68131	0.00125853	0.0152274	0.0127739	BjuVB01G22620/BjuVA07G24870/BjuVB08G58000/BjuVB06G46140/BjuVB08G37840/BjuVA09G45730/BjuVB04G54090/BjuVA04G13210	8
green	GO:0005351	carbohydrate:proton symporter activity	19/3208	186/68131	0.00132891	0.0159732	0.0133995	BjuVA08G08260/BjuVB01G34170/BjuVB03G50040/BjuVA05G28640/BjuVB04G32400/BjuVB01G34160/BjuVA06G16590/BjuVA05G42800/BjuVB07G09460/BjuVA02G44080/BjuVB04G28550/BjuVA03G07190/BjuVB01G47140/BjuVB02G03080/BjuVB02G62080/BjuVB04G28530/BjuVA08G35510/BjuVB04G04670/BjuVA06G05370	19
green	GO:0015297	antiporter activity	28/3208	321/68131	0.00141391	0.0167772	0.014074	BjuVB02G05860/BjuVB03G05150/BjuVA08G32980/BjuVA02G03790/BjuVA09G18450/BjuVA03G18730/BjuVB04G18070/BjuVB08G02710/BjuVB05G11460/BjuVB02G39400/BjuVA06G22990/BjuVB03G04350/BjuVB05G00030/BjuVA03G26890/BjuVA02G03770/BjuVB08G44160/BjuVB04G43300/BjuVB03G12340/BjuVB08G02720/BjuVA08G08870/BjuVA08G33840/BjuVB01G29880/BjuVB02G33500/BjuVA01G17520/BjuVA03G01750/BjuVA01G00240/BjuVA09G03810/BjuVB01G32680	28
green	GO:0008266	poly(U) RNA binding	10/3208	69/68131	0.00141417	0.0167772	0.014074	BjuVA07G17590/BjuVB06G16160/BjuVA07G16240/BjuVB05G40540/BjuVA01G24500/BjuVB07G15970/BjuVA05G08540/BjuVB05G12270/BjuVB06G36740/BjuVA08G23410	10
green	GO:0005985	sucrose metabolic process	9/3208	58/68131	0.00148109	0.0174578	0.014645	BjuVB05G04210/BjuVB04G20050/BjuVB02G72920/BjuVB05G54960/BjuVA07G30100/BjuVB03G44390/BjuVA09G16190/BjuVB02G05220/BjuVB04G34330	9
green	GO:0042759	long-chain fatty acid biosynthetic process	8/3208	48/68131	0.00167463	0.0196125	0.0164525	BjuVB06G37740/BjuVA10G04620/BjuVB07G09770/BjuVA10G04960/BjuVB01G35570/BjuVA09G66930/BjuVA03G38810/BjuVA08G36720	8
green	GO:0004144	diacylglycerol O-acyltransferase activity	11/3208	83/68131	0.0017582	0.0201908	0.0169376	BjuVB02G53630/BjuVA02G40560/BjuVB08G03870/BjuVA03G19270/BjuVB04G07470/BjuVB04G07480/BjuVB03G58010/BjuVA01G25700/BjuVA06G40860/BjuVB05G41790/BjuVB03G44770	11
green	GO:0010168	ER body	7/3208	38/68131	0.00177655	0.0201908	0.0169376	BjuVB01G44640/BjuVB04G47400/BjuVB02G69480/BjuVA01G44220/BjuVB07G03420/BjuVA03G35490/BjuVB06G26580	7
green	GO:0030744	luteolin O-methyltransferase activity	4/3208	12/68131	0.00179032	0.0201908	0.0169376	BjuVA02G15400/BjuVB08G13030/BjuVA03G14520/BjuVA10G11980	4
green	GO:0030755	quercetin 3-O-methyltransferase activity	4/3208	12/68131	0.00179032	0.0201908	0.0169376	BjuVA02G15400/BjuVB08G13030/BjuVA03G14520/BjuVA10G11980	4
green	GO:0033799	myricetin 3'-O-methyltransferase activity	4/3208	12/68131	0.00179032	0.0201908	0.0169376	BjuVA02G15400/BjuVB08G13030/BjuVA03G14520/BjuVA10G11980	4
green	GO:1901599	(-)-pinoresinol biosynthetic process	4/3208	12/68131	0.00179032	0.0201908	0.0169376	BjuVA01G15540/BjuVB05G13340/BjuVB03G13200/BjuVB04G21950	4
green	GO:0016413	O-acetyltransferase activity	14/3208	122/68131	0.00185636	0.0208071	0.0174547	BjuVA03G17090/BjuVB06G48200/BjuVA07G22990/BjuVB06G22890/BjuVA10G23380/BjuVB08G35390/BjuVA09G48230/BjuVA05G11200/BjuVA01G40260/BjuVB08G35400/BjuVA03G38290/BjuVB06G56500/BjuVB03G33420/BjuVA07G36860	14
green	GO:0051555	flavonol biosynthetic process	5/3208	20/68131	0.00197448	0.0219962	0.0184522	BjuVA02G15400/BjuVB08G13030/BjuVA03G14520/BjuVA06G12610/BjuVA10G11980	5
green	GO:0051707	response to other organism	13/3208	110/68131	0.0020397	0.022585	0.0189461	BjuV_Contig00683G00560/BjuVB08G00030/BjuVB08G50200/BjuVA08G29330/BjuVA01G24800/BjuVB02G44030/BjuVA09G05280/BjuVA10G32280/BjuVB05G54180/BjuVA10G32270/BjuVB01G37930/BjuVA03G01580/BjuVA09G51650	13
green	GO:0000162	tryptophan biosynthetic process	10/3208	73/68131	0.00218063	0.024	0.0201331	BjuVA07G29010/BjuVB01G19980/BjuVA07G41100/BjuVB05G57260/BjuVA07G29600/BjuVB04G30530/BjuVB02G62590/BjuVB03G48070/BjuVB03G17480/BjuVB06G41400	10
green	GO:0001228	DNA-binding transcription activator activity, RNA polymerase II-specific	23/3208	254/68131	0.0022354	0.0244556	0.0205152	BjuVB05G33750/BjuVB03G16840/BjuVB06G03230/BjuVB01G02790/BjuVB06G37990/BjuVB02G25570/BjuVA09G16890/BjuVB02G26910/BjuVB02G72850/BjuVB03G16850/BjuVA10G04440/BjuVA10G15550/BjuVA03G61560/BjuVB05G04260/BjuVA08G26480/BjuVA03G12310/BjuVA02G12710/BjuVA09G05290/BjuVA04G32500/BjuVA01G03820/BjuVA01G07090/BjuVB01G01600/BjuVB05G02300	23
green	GO:0005976	polysaccharide metabolic process	4/3208	13/68131	0.00249001	0.0269383	0.022598	BjuVA09G32810/BjuVA05G24170/BjuVB03G32490/BjuVB04G44020	4
green	GO:0003006	developmental process involved in reproduction	5/3208	21/68131	0.00249183	0.0269383	0.022598	BjuVA01G20520/BjuVA01G15990/BjuVB05G18620/BjuVA03G49790/BjuVB02G67390	5
green	GO:0009638	phototropism	8/3208	52/68131	0.00282845	0.0303975	0.0254998	BjuVA06G42460/BjuVA09G08540/BjuVB07G17590/BjuVB07G30210/BjuVB02G52090/BjuVB06G33130/BjuVB04G08550/BjuVA03G38620	8
green	GO:0006241	CTP biosynthetic process	6/3208	31/68131	0.00289058	0.0308835	0.0259075	BjuVB07G49680/BjuVB07G18080/BjuVA02G31310/BjuVB08G41150/BjuVB05G47190/BjuVA06G28970	6
green	GO:0015193	L-proline transmembrane transporter activity	5/3208	22/68131	0.00310086	0.0329376	0.0276306	BjuVA04G30190/BjuVB04G18090/BjuVA05G06400/BjuVB06G06140/BjuVA09G18420	5
green	GO:0009813	flavonoid biosynthetic process	33/3208	421/68131	0.0032455	0.0342748	0.0287524	BjuVB06G19500/BjuVB02G60400/BjuVB05G11460/BjuVB07G11290/BjuVA10G31450/BjuVB07G22060/BjuVB08G50440/BjuVA06G29220/BjuVA03G31110/BjuVB04G46960/BjuVA08G29330/BjuVB02G43270/BjuVA10G24180/BjuVB06G03640/BjuVB04G01620/BjuVA02G47930/BjuVA10G30980/BjuVB03G12340/BjuVA02G07330/BjuVB05G23540/BjuVA09G44350/BjuVB03G03680/BjuVB02G40460/BjuVB07G17910/BjuVA01G17520/BjuVA04G24470/BjuVA04G21620/BjuVA09G27890/BjuVB06…	33
green	GO:0009693	ethylene biosynthetic process	9/3208	65/68131	0.00331365	0.0347933	0.0291873	BjuVA09G16390/BjuVB02G05050/BjuVB03G50160/BjuVA02G26000/BjuVB06G32180/BjuVA06G09510/BjuVA03G67180/BjuVA09G63900/BjuVB04G19830	9
green	GO:0008883	glutamyl-tRNA reductase activity	4/3208	14/68131	0.00335683	0.0350453	0.0293988	BjuVA01G29520/BjuVB07G15170/BjuVA09G18480/BjuVB04G18040	4
green	GO:0015976	carbon utilization	6/3208	32/68131	0.0034177	0.0354781	0.0297618	BjuVA02G21600/BjuV_Contig00518_ERROPOS2626043G00040/BjuVA07G36940/BjuVB04G52140/BjuVB03G42890/BjuVB04G52150	6
green	GO:0009705	plant-type vacuole membrane	29/3208	358/68131	0.00349656	0.0360916	0.0302765	BjuVA03G39030/BjuVA09G07060/BjuVB07G29830/BjuVB04G32400/BjuVA06G12010/BjuVB04G47400/BjuVA06G16590/BjuVA07G29010/BjuVB01G38360/BjuVA10G15220/BjuVA07G41100/BjuVB05G57260/BjuVA07G23610/BjuVB04G28550/BjuVB07G19020/BjuVA04G28060/BjuVA01G38950/BjuVB01G02620/BjuVA05G07680/BjuVA08G35510/BjuVB07G07850/BjuVB03G48070/BjuVB06G35250/BjuVB06G43150/BjuVA05G28310/BjuVA05G33390/BjuVB08G18960/BjuVB05G15040/BjuVB06…	29
green	GO:0004857	enzyme inhibitor activity	14/3208	131/68131	0.00359571	0.0367397	0.0308202	BjuVA10G09640/BjuVB01G22620/BjuVB08G08130/BjuVA07G14330/BjuVA09G16060/BjuVB05G11790/BjuVB08G46830/BjuVB03G36550/BjuVA01G17210/BjuVB07G18680/BjuVA02G17180/BjuVA10G19500/BjuVB06G13630/BjuVA04G13210	14
green	GO:0015934	large ribosomal subunit	8/3208	54/68131	0.00359957	0.0367397	0.0308202	BjuVA09G49960/BjuVA07G22340/BjuVB01G16850/BjuVA04G00040/BjuVB02G15960/BjuVB06G48860/BjuVB06G52140/BjuVA09G56500	8
green	GO:0009514	glyoxysome	9/3208	66/68131	0.00367946	0.0371402	0.0311561	BjuVB01G32590/BjuVA05G27140/BjuVB07G11270/BjuVA03G45420/BjuVB02G09870/BjuV_Contig00683G00250/BjuVB01G18010/BjuVA04G16660/BjuVA04G07830	9
green	GO:2000280	regulation of root development	9/3208	66/68131	0.00367946	0.0371402	0.0311561	BjuVB02G43100/BjuVA10G31280/BjuV_Contig01058_ERROPOS1500000G00060/BjuV_Contig00925G00200/BjuVA08G35100/BjuVA02G01950/BjuVB01G00380/BjuVA09G54050/BjuVB03G03130	9
green	GO:0016168	chlorophyll binding	13/3208	118/68131	0.00378867	0.0380324	0.0319046	BjuVB07G49690/BjuVB07G42980/BjuVA05G16890/BjuVA08G00420/BjuVB06G24830/BjuVA09G61100/BjuVB03G06260/BjuVA03G28380/BjuVA08G25310/BjuVA09G36260/BjuV_Contig00208G00060/BjuVA08G30400/BjuVA05G06250	13
green	GO:0033306	phytol metabolic process	5/3208	23/68131	0.00381022	0.0380397	0.0319107	BjuVB02G53630/BjuVA02G40560/BjuVB04G07470/BjuVB04G07480/BjuVA06G40860	5
green	GO:0046910	pectinesterase inhibitor activity	17/3208	175/68131	0.00389936	0.0387181	0.0324798	BjuVA09G41940/BjuVA02G17190/BjuVA06G26840/BjuVB01G46720/BjuV_Contig00235G00300/BjuVA03G01890/BjuVB01G40210/BjuVA06G18390/BjuVB07G04210/BjuVA05G35270/BjuVB01G02840/BjuVB08G48570/BjuVB01G00220/BjuVA01G43350/BjuVA01G25660/BjuVB05G04790/BjuVB03G09230	17
green	GO:0030497	fatty acid elongation	6/3208	33/68131	0.00401307	0.0396318	0.0332463	BjuVB05G40700/BjuV_Contig00272G00120/BjuVB07G01770/BjuVA01G24730/BjuVA09G43700/BjuV_Contig00369G00130	6
green	GO:0019762	glucosinolate catabolic process	13/3208	119/68131	0.00407395	0.0400167	0.0335692	BjuVB01G44640/BjuVB01G38180/BjuVA01G44220/BjuVB01G38170/BjuVA05G33180/BjuVA07G25120/BjuVA05G19260/BjuVB07G03420/BjuVB07G47220/BjuVA05G12390/BjuVA03G35490/BjuVB06G26580/BjuVA05G12400	13
green	GO:0016531	copper chaperone activity	4/3208	15/68131	0.00440817	0.0426123	0.0357465	BjuVB06G48130/BjuVB08G55120/BjuVB04G48380/BjuVA07G23100	4
green	GO:0030104	water homeostasis	4/3208	15/68131	0.00440817	0.0426123	0.0357465	BjuVA06G41070/BjuVB02G53410/BjuVB04G07640/BjuVB06G26580	4
green	GO:0046912	acyltransferase, acyl groups converted into alkyl on transfer	4/3208	15/68131	0.00440817	0.0426123	0.0357465	BjuVB02G62680/BjuVB03G49900/BjuVB02G62670/BjuVA06G17330	4
green	GO:0010043	response to zinc ion	19/3208	207/68131	0.0044329	0.0426258	0.0357579	BjuVA03G20880/BjuVA08G22340/BjuVA01G15520/BjuVA03G21720/BjuVB04G09300/BjuVA09G56920/BjuVB02G67070/BjuVA01G18390/BjuVA01G43780/BjuVB05G13350/BjuVB08G21050/BjuVA06G01170/BjuVB02G47780/BjuVA01G43770/BjuVA01G43220/BjuVA09G23450/BjuVB01G05330/BjuVA10G23170/BjuVB06G39510	19
green	GO:0048766	root hair initiation	8/3208	56/68131	0.00452397	0.0431156	0.0361688	BjuVB03G16840/BjuVB02G72850/BjuVB03G16850/BjuVA07G37460/BjuVA03G61560/BjuVB05G04260/BjuVA08G26480/BjuVA07G31100	8
green	GO:0003993	acid phosphatase activity	16/3208	163/68131	0.00453103	0.0431156	0.0361688	BjuVB04G12230/BjuVA02G33760/BjuVA09G20720/BjuVA08G37770/BjuVA01G26040/BjuVA01G17060/BjuVA06G46670/BjuVB03G05930/BjuVB04G16190/BjuVA08G32290/BjuVB03G00560/BjuVA02G17330/BjuVB03G29100/BjuVA06G18940/BjuVA03G45260/BjuVA06G42980	16
green	GO:0033386	geranylgeranyl diphosphate biosynthetic process	5/3208	24/68131	0.00462853	0.0435893	0.0365661	BjuVB04G23600/BjuVA07G02160/BjuVB05G01900/BjuVB07G27870/BjuVB07G27810	5
green	GO:0043090	amino acid import	5/3208	24/68131	0.00462853	0.0435893	0.0365661	BjuVB04G53520/BjuVB04G18090/BjuVA09G29900/BjuVB08G44190/BjuVA09G18420	5
green	GO:0031348	negative regulation of defense response	13/3208	121/68131	0.0046965	0.0438544	0.0367885	BjuVB01G44640/BjuV_Contig00683G00560/BjuVA01G44220/BjuVA06G07690/BjuVA02G24370/BjuVB05G00030/BjuVB07G03420/BjuVB05G56840/BjuVA03G35490/BjuVB04G26160/BjuVA01G00240/BjuVA09G64240/BjuVA09G51650	13
green	GO:0010431	seed maturation	11/3208	94/68131	0.00470469	0.0438544	0.0367885	BjuVA06G26590/BjuVA09G08970/BjuVA10G25480/BjuVA02G05060/BjuVB07G19630/BjuVB06G23080/BjuVA06G33570/BjuVB08G48080/BjuVB02G21650/BjuVA06G18830/BjuVB02G63190	11
green	GO:0009058	biosynthetic process	15/3208	151/68131	0.00525748	0.0485367	0.0407164	BjuVA09G53490/BjuVA07G29810/BjuVB03G34670/BjuVB03G34680/BjuVB01G06560/BjuVB02G67020/BjuVB01G16370/BjuVB06G20050/BjuVA02G17720/BjuVA09G13190/BjuVA03G30110/BjuVA07G26900/BjuVA03G22780/BjuVB05G13420/BjuVA05G14400	15
green	GO:0006869	lipid transport	25/3208	304/68131	0.00526013	0.0485367	0.0407164	BjuVB06G04030/BjuVA06G00410/BjuVB04G46070/BjuVA08G04320/BjuVB07G49340/BjuVA08G00780/BjuVA05G40140/BjuVB02G24080/BjuVA05G04380/BjuVB06G07050/BjuVB07G45170/BjuVA03G44520/BjuVB08G14460/BjuVB03G16760/BjuVA01G42860/BjuVA03G11770/BjuVA02G43030/BjuVA06G19700/BjuVB07G09090/BjuVA05G07320/BjuVA09G52340/BjuVA03G11600/BjuVB06G13110/BjuVB04G38020/BjuVB08G50920	25
grey	GO:0009648	photoperiodism	44961	34/68131	1.4494e-06	2.46398e-05	NA	BjuVA05G06270/BjuVB08G21460	2
grey	GO:0042753	positive regulation of circadian rhythm	44961	57/68131	4.12158e-06	2.76699e-05	NA	BjuVA05G06270/BjuVB08G21460	2
grey	GO:0009649	entrainment of circadian clock	44961	62/68131	4.88292e-06	2.76699e-05	NA	BjuVA05G06270/BjuVB08G21460	2
grey	GO:0010017	red or far-red light signaling pathway	44961	92/68131	1.08027e-05	4.59114e-05	NA	BjuVA05G06270/BjuVB08G21460	2
grey	GO:0048511	rhythmic process	44961	103/68131	1.35534e-05	4.60814e-05	NA	BjuVA05G06270/BjuVB08G21460	2
grey	GO:0048573	photoperiodism, flowering	44961	128/68131	2.09609e-05	5.93893e-05	NA	BjuVA05G06270/BjuVB08G21460	2
grey	GO:0010114	response to red light	44961	185/68131	4.38431e-05	0.000106476	NA	BjuVA05G06270/BjuVB08G21460	2
grey	GO:0009585	red, far-red light phototransduction	44961	201/68131	5.17608e-05	0.000109992	NA	BjuVA05G06270/BjuVB08G21460	2
grey	GO:0009909	regulation of flower development	44961	283/68131	0.000102592	0.000193784	NA	BjuVA05G06270/BjuVB08G21460	2
grey	GO:0080167	response to karrikin	44961	374/68131	0.000179012	0.00030432	NA	BjuVA05G06270/BjuVB08G21460	2
grey	GO:0015385	sodium:proton antiporter activity	44930	21/68131	0.00123238	0.00190458	NA	BjuVB02G24100	1
grey	GO:0004860	protein kinase inhibitor activity	44930	33/68131	0.00193608	0.00274278	NA	BjuVB02G64930	1
grey	GO:0055075	potassium ion homeostasis	44930	42/68131	0.00246361	0.00322165	NA	BjuVB02G24100	1
grey	GO:0006885	regulation of pH	44930	98/68131	0.00574135	0.00697163	NA	BjuVB02G24100	1
grey	GO:0009741	response to brassinosteroid	44930	114/68131	0.00667636	0.00756654	NA	BjuVB02G64930	1
grey	GO:0009742	brassinosteroid mediated signaling pathway	44930	244/68131	0.0142489	0.0151394	NA	BjuVB02G64930	1
grey	GO:0006629	lipid metabolic process	44930	344/68131	0.0200444	0.0200444	NA	BjuVB02G64930	1
magenta	GO:0070469	respirasome	8/182	106/68131	5.35766e-10	1.99305e-07	1.66369e-07	BjuV_Contig00390G00140/BjuV_Contig00390G00010/BjuV_Contig00390G00100/BjuVA06G07000/BjuV_Contig00396G00300/BjuV_Contig01063G00310/BjuV_Contig01063G00120/BjuV_Contig00396G00240	8
magenta	GO:0008137	NADH dehydrogenase (ubiquinone) activity	8/182	153/68131	9.87343e-09	1.83646e-06	1.53298e-06	BjuV_Contig00390G00140/BjuV_Contig00390G00010/BjuV_Contig00390G00100/BjuVA06G07000/BjuV_Contig00396G00300/BjuV_Contig01063G00310/BjuV_Contig01063G00120/BjuV_Contig00396G00240	8
magenta	GO:0042773	ATP synthesis coupled electron transport	4/182	47/68131	8.03215e-06	0.000995986	0.000831398	BjuV_Contig00390G00140/BjuV_Contig00396G00300/BjuV_Contig01063G00310/BjuV_Contig00396G00240	4
magenta	GO:0017004	cytochrome complex assembly	3/182	33/68131	9.64333e-05	0.0089683	0.00748627	BjuV_Contig00390G00530/BjuV_Contig00396G00160/BjuV_Contig01063G00420	3
pink	GO:0042631	cellular response to water deprivation	44999	160/68131	4.53942e-06	0.000167959	5.25618e-05	BjuVB07G41160/BjuVB01G10730/BjuVB01G10720	3
pink	GO:0010118	stomatal movement	44971	156/68131	0.000465546	0.0080628	0.00252321	BjuVB01G10730/BjuVB01G10720	2
pink	GO:0010119	regulation of stomatal movement	44971	201/68131	0.000769908	0.0080628	0.00252321	BjuVB01G10730/BjuVB01G10720	2
pink	GO:0009788	negative regulation of abscisic acid-activated signaling pathway	44971	214/68131	0.000871654	0.0080628	0.00252321	BjuVB01G10730/BjuVB01G10720	2
pink	GO:0000427	plastid-encoded plastid RNA polymerase complex	44940	17/68131	0.00348794	0.0258108	0.00807734	BjuVB07G41160	1
pink	GO:0004332	fructose-bisphosphate aldolase activity	44940	23/68131	0.00471628	0.0281725	0.00881642	BjuVB01G07250	1
pink	GO:0070628	proteasome binding	44940	26/68131	0.00532992	0.0281725	0.00881642	BjuVA04G10210	1
pink	GO:0032544	plastid translation	44940	38/68131	0.00778098	0.035987	0.0112619	BjuVB07G41160	1
pink	GO:0045727	positive regulation of translation	44940	49/68131	0.0100229	0.0412051	0.0128949	BjuVB07G41160	1
pink	GO:0003824	catalytic activity	44940	75/68131	0.0153031	0.0499281	0.0156247	BjuVB07G41160	1
pink	GO:0016925	protein sumoylation	44940	78/68131	0.0159107	0.0499281	0.0156247	BjuVA04G10210	1
pink	GO:0004565	beta-galactosidase activity	44940	91/68131	0.0185395	0.0499281	0.0156247	BjuVA02G13670	1
pink	GO:0000272	polysaccharide catabolic process	44940	98/68131	0.0199524	0.0499281	0.0156247	BjuVB07G41160	1
pink	GO:0047262	polygalacturonate 4-alpha-galacturonosyltransferase activity	44940	108/68131	0.0219674	0.0499281	0.0156247	BjuVA05G37440	1
pink	GO:0008237	metallopeptidase activity	44940	109/68131	0.0221687	0.0499281	0.0156247	BjuVA04G10210	1
pink	GO:0012501	programmed cell death	44940	115/68131	0.0233756	0.0499281	0.0156247	BjuVA01G00090	1
pink	GO:0050662	obsolete coenzyme binding	44940	115/68131	0.0233756	0.0499281	0.0156247	BjuVB07G41160	1
pink	GO:2000031	regulation of salicylic acid mediated signaling pathway	44940	121/68131	0.0245812	0.0499281	0.0156247	BjuV_Contig00791G00040	1
pink	GO:0010319	stromule	44940	128/68131	0.0259859	0.0499281	0.0156247	BjuVB07G41160	1
pink	GO:0045489	pectin biosynthetic process	44940	133/68131	0.0269882	0.0499281	0.0156247	BjuVA05G37440	1
red	GO:0010501	RNA secondary structure unwinding	21/780	226/68131	3.00303e-13	2.8739e-10	2.31708e-10	BjuVB02G23660/BjuVB05G02460/BjuVA01G02740/BjuVB07G24140/BjuVB01G03090/BjuVB06G00310/BjuVA07G45080/BjuVB07G18190/BjuVA06G19900/BjuVA07G24390/BjuVA10G12650/BjuVA06G16670/BjuVB06G58260/BjuVB08G25410/BjuVB01G09420/BjuVB02G74100/BjuVB07G00540/BjuVA02G01940/BjuVB04G32500/BjuV_Contig00478G00030/BjuVB07G10080	21
red	GO:0000398	mRNA splicing, via spliceosome	23/780	388/68131	2.27519e-10	1.08868e-07	8.77744e-08	BjuVB03G25620/BjuVB06G03380/BjuVA02G27480/BjuVB04G26780/BjuVA06G41060/BjuVB06G43440/BjuVA09G02390/BjuVA05G03630/BjuVA05G38970/BjuVB05G24220/BjuVA09G60460/BjuVA06G16670/BjuVB05G59900/BjuVB03G05860/BjuVB01G43750/BjuVB08G37800/BjuVB03G13540/BjuVB04G32500/BjuVA07G44700/BjuVA03G16000/BjuVB02G40530/BjuVB08G57680/BjuVB05G15180	23
red	GO:0071013	catalytic step 2 spliceosome	14/780	219/68131	3.00548e-07	9.58747e-05	7.72988e-05	BjuVA02G27480/BjuVB04G26780/BjuVB06G43440/BjuVA09G02390/BjuVA07G45080/BjuVA06G19900/BjuVB05G59900/BjuVB03G05860/BjuVB08G37800/BjuVB06G58260/BjuVB01G09420/BjuVA07G44700/BjuVB05G15180/BjuVB07G10080	14
red	GO:0006997	nucleus organization	7/780	43/68131	5.65254e-07	0.000135237	0.000109034	BjuVB04G25600/BjuVA03G33540/BjuVB07G26250/BjuVB02G31420/BjuVB01G46700/BjuVA01G18350/BjuVA06G08260	7
red	GO:0005652	nuclear lamina	5/780	18/68131	1.47035e-06	0.00021383	0.0001724	BjuVB04G25600/BjuVA03G33540/BjuVB07G26250/BjuVB01G46700/BjuVA06G08260	5
red	GO:0043966	histone H3 acetylation	6/780	32/68131	1.55315e-06	0.00021383	0.0001724	BjuVB03G50540/BjuV_Contig00466G00230/BjuV_Contig00859G00110/BjuVB03G08410/BjuVB04G32210/BjuVA06G16440	6
red	GO:0010228	vegetative to reproductive phase transition of meristem	17/780	367/68131	1.57868e-06	0.00021383	0.0001724	BjuVA06G46560/BjuVB06G03380/BjuVA07G21430/BjuVA05G16630/BjuVA05G03630/BjuVA03G59610/BjuVB08G54470/BjuVB05G03040/BjuVB05G47320/BjuVB06G23310/BjuVB06G49860/BjuVA03G36730/BjuVB06G04640/BjuVA02G27270/BjuVA09G48690/BjuVB08G57680/BjuVB02G48020	17
red	GO:0000184	nuclear-transcribed mRNA catabolic process, nonsense-mediated decay	8/780	72/68131	1.7875e-06	0.00021383	0.0001724	BjuVB07G24140/BjuVB05G38770/BjuVB07G18190/BjuVB02G32110/BjuVA02G08700/BjuVB03G32520/BjuVA05G24120/BjuVB04G44070	8
red	GO:0016569	covalent chromatin modification	16/780	346/68131	3.24582e-06	0.000315961	0.000254743	BjuVB06G31630/BjuVA03G33540/BjuVA03G02370/BjuVA08G29170/BjuVB07G13790/BjuVA09G51740/BjuVA01G16600/BjuVA01G31040/BjuVA08G12690/BjuVB07G26250/BjuVB08G51520/BjuVB05G46730/BjuVB01G46700/BjuVB05G12350/BjuVB01G09500/BjuVB01G43010	16
red	GO:0071006	U2-type catalytic step 1 spliceosome	5/780	21/68131	3.39407e-06	0.000315961	0.000254743	BjuVA02G27480/BjuVB06G43440/BjuVB05G59900/BjuVB01G12650/BjuVA07G44700	5
red	GO:0006378	mRNA polyadenylation	8/780	79/68131	3.63174e-06	0.000315961	0.000254743	BjuVB06G03380/BjuVB04G08920/BjuVA05G03630/BjuVA08G31060/BjuVA04G27940/BjuVA01G20600/BjuVB08G57680/BjuVB03G17010	8
red	GO:0009051	pentose-phosphate shunt, oxidative branch	5/780	25/68131	8.53194e-06	0.000680422	0.000548589	BjuVA07G12610/BjuVB03G17240/BjuVB03G29390/BjuVB01G20580/BjuVA04G15140	5
red	GO:0016363	nuclear matrix	6/780	55/68131	3.97383e-05	0.00292535	0.00235856	BjuVB05G36460/BjuVA10G18360/BjuVA05G17010/BjuVB03G32070/BjuVA02G10680/BjuVB03G45320	6
red	GO:0007613	memory	4/780	18/68131	4.59083e-05	0.00313816	0.00253013	BjuVB08G51400/BjuVB08G32550/BjuVB03G34460/BjuVA09G67860	4
red	GO:0000159	protein phosphatase type 2A complex	7/780	85/68131	5.71501e-05	0.00364617	0.00293972	BjuVB05G28450/BjuVB08G28710/BjuVA06G35140/BjuVB03G22230/BjuVA02G01110/BjuVA03G35210/BjuVB08G28600	7
red	GO:0019375	galactolipid biosynthetic process	4/780	21/68131	8.73724e-05	0.00522596	0.00421342	BjuVB01G44450/BjuVB05G24430/BjuVA01G44080/BjuVA05G39580	4
red	GO:0004402	histone acetyltransferase activity	7/780	92/68131	9.46766e-05	0.00532974	0.00429709	BjuV_Contig00466G00230/BjuV_Contig00859G00110/BjuVA06G31950/BjuVB03G25410/BjuVB05G59510/BjuVB06G57260/BjuVB07G09640	7
red	GO:0042393	histone binding	8/780	130/68131	0.000135755	0.00721765	0.00581921	BjuVA01G02280/BjuVB04G24520/BjuVA03G02370/BjuV_Contig00466G00230/BjuVB02G01550/BjuV_Contig00859G00110/BjuVA09G10940/BjuVB05G02060	8
red	GO:0050684	regulation of mRNA processing	3/780	10/68131	0.00016893	0.00850873	0.00686014	BjuVB05G36460/BjuVA10G18360/BjuVA02G10680	3
red	GO:0048366	leaf development	15/780	437/68131	0.000191947	0.00852029	0.00686947	BjuVB02G02810/BjuVB04G40190/BjuVA08G18980/BjuVB07G30560/BjuVB05G16720/BjuVB03G10310/BjuVA01G11750/BjuVB01G07330/BjuVA08G31060/BjuVA04G27850/BjuVA03G54100/BjuVB06G23310/BjuVB05G12490/BjuVB03G02440/BjuVA09G36520	15
red	GO:0031047	gene silencing by RNA	9/780	174/68131	0.000197281	0.00852029	0.00686947	BjuVB03G33690/BjuVB04G24520/BjuVB07G13790/BjuVA05G26370/BjuVA09G10940/BjuVA01G31040/BjuVB02G12120/BjuVA07G21550/BjuVB01G31710	9
red	GO:0009788	negative regulation of abscisic acid-activated signaling pathway	10/780	214/68131	0.000202726	0.00852029	0.00686947	BjuVA06G30530/BjuVB08G08230/BjuVB02G14160/BjuVB04G01060/BjuVA03G10140/BjuVA09G32670/BjuVB07G17380/BjuVB06G13760/BjuVB06G22470/BjuVB02G61030	10
red	GO:0009867	jasmonic acid mediated signaling pathway	8/780	138/68131	0.000204772	0.00852029	0.00686947	BjuVB06G34680/BjuVA06G11400/BjuVB03G32520/BjuVB03G32070/BjuVB01G37050/BjuVA05G24120/BjuVB06G06090/BjuVB04G44070	8
red	GO:0009116	nucleoside metabolic process	5/780	49/68131	0.000244117	0.00935047	0.00753879	BjuVB03G54640/BjuVB05G03520/BjuVB04G42590/BjuVA09G34030/BjuVA07G04220	5
red	GO:0008380	RNA splicing	16/780	497/68131	0.00024454	0.00935047	0.00753879	BjuVA10G27990/BjuVB04G26780/BjuVB02G50720/BjuVB05G36460/BjuVA06G43100/BjuVA10G18360/BjuVB03G15450/BjuVB01G14430/BjuVA02G10680/BjuVA09G55190/BjuVB06G26930/BjuVA02G27270/BjuVB05G33290/BjuVB05G15180/BjuVA07G18190/BjuVB07G10080	16
red	GO:0016032	viral process	9/780	183/68131	0.000286728	0.00935047	0.00753879	BjuVA10G25470/BjuVB05G36460/BjuVA10G18360/BjuVB03G32070/BjuVA09G06100/BjuVA02G10680/BjuVA08G14100/BjuVB05G24100/BjuVB05G15180	9
red	GO:0002576	platelet degranulation	3/780	12/68131	0.000304451	0.00935047	0.00753879	BjuVB03G08410/BjuVB04G32210/BjuVA06G16440	3
red	GO:0005697	telomerase holoenzyme complex	3/780	12/68131	0.000304451	0.00935047	0.00753879	BjuVB05G38770/BjuVB02G32110/BjuVA02G08700	3
red	GO:0007612	learning	3/780	12/68131	0.000304451	0.00935047	0.00753879	BjuVB08G32550/BjuVB03G34460/BjuVA09G67860	3
red	GO:0009113	purine nucleobase biosynthetic process	3/780	12/68131	0.000304451	0.00935047	0.00753879	BjuVB03G54640/BjuVB05G03520/BjuVA07G04220	3
red	GO:0016139	glycoside catabolic process	3/780	12/68131	0.000304451	0.00935047	0.00753879	BjuVB05G47780/BjuVB01G30300/BjuVA07G09220	3
red	GO:0009749	response to glucose	7/780	112/68131	0.000321665	0.00935047	0.00753879	BjuVA06G30530/BjuVB02G04720/BjuVB04G01060/BjuVB07G17380/BjuVB06G13760/BjuVB01G20580/BjuVA04G15140	7
red	GO:0045211	postsynaptic membrane	4/780	29/68131	0.00032243	0.00935047	0.00753879	BjuVB02G62330/BjuVB08G32550/BjuVA09G07020/BjuVB03G34460	4
red	GO:0000381	regulation of alternative mRNA splicing, via spliceosome	5/780	53/68131	0.000353808	0.00967412	0.00779974	BjuVB04G25570/BjuVB08G12260/BjuVB03G05860/BjuVB01G14430/BjuVA07G18190	5
red	GO:0032586	protein storage vacuole membrane	5/780	53/68131	0.000353808	0.00967412	0.00779974	BjuVB01G44450/BjuVA01G44080/BjuVB03G02840/BjuVA05G39580/BjuVB03G44510	5
red	GO:0010032	meiotic chromosome condensation	3/780	13/68131	0.000392419	0.0104318	0.00841061	BjuVA03G33540/BjuVB07G26250/BjuVB01G46700	3
red	GO:0036513	Derlin-1 retrotranslocation complex	4/780	32/68131	0.000475078	0.0122878	0.00990703	BjuVB06G54690/BjuVB06G02360/BjuVB06G47060/BjuVB07G07720	4
red	GO:0034450	ubiquitin-ubiquitin ligase activity	3/780	15/68131	0.000613731	0.0154563	0.0124616	BjuVB02G35540/BjuVB06G15080/BjuVA06G31910	3
red	GO:0007095	mitotic G2 DNA damage checkpoint signaling	3/780	16/68131	0.000748945	0.0179185	0.0144467	BjuVA03G33540/BjuVB07G26250/BjuVB01G46700	3
red	GO:0048571	long-day photoperiodism	3/780	16/68131	0.000748945	0.0179185	0.0144467	BjuVB03G32520/BjuVA05G24120/BjuVB04G44070	3
red	GO:0006809	nitric oxide biosynthetic process	3/780	17/68131	0.000901711	0.0207331	0.016716	BjuVB06G42440/BjuVB03G32070/BjuVA07G28060	3
red	GO:0009693	ethylene biosynthetic process	5/780	65/68131	0.000909917	0.0207331	0.016716	BjuVB04G48610/BjuVB07G46530/BjuVB06G26070/BjuVA05G18050/BjuVA06G00730	5
red	GO:0008285	negative regulation of cell population proliferation	6/780	101/68131	0.00111496	0.0238849	0.0192572	BjuVB04G40190/BjuVA09G54900/BjuVB03G00580/BjuVA08G31060/BjuVA09G36520/BjuVB02G55930	6
red	GO:0009880	embryonic pattern specification	4/780	40/68131	0.00112312	0.0238849	0.0192572	BjuVB02G28230/BjuVA07G31040/BjuVB03G09740/BjuVB03G36330	4
red	GO:0042594	response to starvation	4/780	40/68131	0.00112312	0.0238849	0.0192572	BjuVA09G54620/BjuVB04G17320/BjuVA01G28090/BjuVA10G01900	4
red	GO:0019901	protein kinase binding	7/780	140/68131	0.00121251	0.0243562	0.0196371	BjuVB02G62330/BjuVA07G21620/BjuVA09G07020/BjuVA09G51180/BjuVB03G37520/BjuVB03G41260/BjuVA07G32060	7
red	GO:0034045	phagophore assembly site membrane	4/780	41/68131	0.00123335	0.0243562	0.0196371	BjuVA09G54620/BjuVB04G17320/BjuVA01G28090/BjuVA10G01900	4
red	GO:0008206	bile acid metabolic process	3/780	19/68131	0.00126323	0.0243562	0.0196371	BjuVB05G47780/BjuVB01G30300/BjuVA07G09220	3
red	GO:0042800	histone methyltransferase activity (H3-K4 specific)	3/780	19/68131	0.00126323	0.0243562	0.0196371	BjuVA05G16630/BjuVB08G51400/BjuVB06G49860	3
red	GO:0016607	nuclear speck	11/780	319/68131	0.00127253	0.0243562	0.0196371	BjuVA10G27990/BjuVB02G50720/BjuVA02G11120/BjuVB08G41580/BjuVA06G28490/BjuVB01G14430/BjuVB03G13540/BjuVB06G13420/BjuVA09G06830/BjuVA07G18190/BjuVB07G10080	11
red	GO:0070034	telomerase RNA binding	3/780	20/68131	0.00147356	0.0276509	0.0222935	BjuVB05G38770/BjuVB02G32110/BjuVA02G08700	3
red	GO:0004345	glucose-6-phosphate dehydrogenase activity	3/780	21/68131	0.00170459	0.031371	0.0252928	BjuVA07G12610/BjuVB03G17240/BjuVB03G29390	3
red	GO:0016579	protein deubiquitination	8/780	193/68131	0.00184436	0.0333029	0.0268504	BjuVB01G40120/BjuVA04G31200/BjuVB05G12490/BjuVA03G50140/BjuVA09G56090/BjuVA02G04010/BjuVB05G25260/BjuVA09G67550	8
red	GO:0031048	heterochromatin assembly by small RNA	3/780	22/68131	0.00195703	0.0346829	0.027963	BjuVB06G03380/BjuVA05G03630/BjuVB08G57680	3
red	GO:0006913	nucleocytoplasmic transport	3/780	23/68131	0.00223154	0.0388288	0.0313056	BjuVA01G02280/BjuVB05G02060/BjuVB01G14430	3
red	GO:0031625	ubiquitin protein ligase binding	12/780	396/68131	0.00230916	0.0394618	0.031816	BjuVB03G00580/BjuVB02G29310/BjuVB02G48590/BjuVA06G45990/BjuVA03G60230/BjuVA06G31950/BjuVA06G07750/BjuVB04G36060/BjuVB01G30730/BjuVB03G09700/BjuVB04G11720/BjuVA08G18420	12
red	GO:0030162	regulation of proteolysis	5/780	81/68131	0.00243053	0.0402068	0.0324166	BjuVB02G29310/BjuVB02G48590/BjuVA06G45990/BjuVA06G31950/BjuVB04G11720	5
red	GO:0006511	ubiquitin-dependent protein catabolic process	13/780	452/68131	0.00243677	0.0402068	0.0324166	BjuVA03G33540/BjuVB02G35540/BjuVB03G19430/BjuVB01G40120/BjuVB07G26250/BjuVA04G31200/BjuVB01G46700/BjuVB05G12490/BjuVA03G50140/BjuVA09G56090/BjuVA02G04010/BjuVB05G25260/BjuVA09G67550	13
red	GO:0043021	ribonucleoprotein complex binding	3/780	24/68131	0.00252877	0.0410174	0.0330702	BjuVB05G38770/BjuVB02G32110/BjuVA02G08700	3
red	GO:0005849	mRNA cleavage factor complex	3/780	25/68131	0.00284931	0.0439805	0.0354592	BjuVB04G25570/BjuVB08G12260/BjuVA04G27940	3
red	GO:0043967	histone H4 acetylation	3/780	25/68131	0.00284931	0.0439805	0.0354592	BjuV_Contig00466G00230/BjuV_Contig00859G00110/BjuVB02G10960	3
red	GO:0044390	ubiquitin-like protein conjugating enzyme binding	3/780	25/68131	0.00284931	0.0439805	0.0354592	BjuVB06G54690/BjuVB06G02360/BjuVB06G47060	3
red	GO:0005681	spliceosomal complex	12/780	408/68131	0.00293879	0.0446417	0.0359923	BjuVA02G27480/BjuVB04G26780/BjuVB02G50720/BjuVA06G41060/BjuVB06G43440/BjuVA09G02390/BjuVB05G24220/BjuVB05G59900/BjuVB08G37800/BjuVA07G44700/BjuVA02G27270/BjuVB05G15180	12
red	GO:0007140	male meiotic nuclear division	3/780	26/68131	0.00319376	0.0477567	0.0385037	BjuVA03G33540/BjuVB07G26250/BjuVB01G46700	3
yellow	GO:0022627	cytosolic small ribosomal subunit	25/801	357/68131	1.81917e-12	2.01018e-09	1.84789e-09	BjuVB04G04540/BjuVA03G00930/BjuVA01G25820/BjuVA01G44410/BjuVA10G23160/BjuVB02G43780/BjuVB08G18560/BjuVA06G36890/BjuVA08G24200/BjuVB01G07500/BjuVA09G53110/BjuVB05G32780/BjuVA08G31870/BjuVA09G61040/BjuVB08G48220/BjuV_Contig00807G00030/BjuVA09G51480/BjuVB02G72860/BjuVB03G19310/BjuVB04G05960/BjuV_Contig00990G00250/BjuVA03G01760/BjuVA03G35270/BjuVB08G00640/BjuVA03G24830	25
yellow	GO:0002181	cytoplasmic translation	16/801	173/68131	3.12803e-10	1.72824e-07	1.58871e-07	BjuVB02G59240/BjuVA03G20400/BjuVA06G43660/BjuVB04G09540/BjuVA03G26000/BjuVB02G25380/BjuVA03G49490/BjuVB08G11650/BjuVA03G13080/BjuVB08G19550/BjuVB04G23070/BjuVA10G14330/BjuVA07G40190/BjuVA02G37360/BjuVB06G40740/BjuVA04G21420	16
yellow	GO:2000377	regulation of reactive oxygen species metabolic process	8/801	71/68131	1.9528e-06	0.000719283	0.000661213	BjuVB08G05010/BjuVB05G04210/BjuVA04G25680/BjuVB04G19450/BjuVB06G30270/BjuVA09G34200/BjuVB07G38920/BjuVA08G09520	8
yellow	GO:0005840	ribosome	18/801	425/68131	3.99702e-06	0.00110418	0.00101503	BjuVA04G25750/BjuVA07G23350/BjuVB07G07090/BjuVA09G47430/BjuVA08G25780/BjuVA07G32120/BjuVA07G32110/BjuVA01G03880/BjuVB04G07280/BjuVA03G11300/BjuVA09G53110/BjuVB04G05960/BjuV_Contig00990G00250/BjuVA02G48870/BjuVA04G03710/BjuVB04G00760/BjuVA10G23880/BjuVA03G24830	18
yellow	GO:0046961	proton-transporting ATPase activity, rotational mechanism	9/801	118/68131	1.17321e-05	0.00229484	0.00210957	BjuVB08G31180/BjuVB04G21190/BjuVA02G31220/BjuVA06G48070/BjuVB06G27340/BjuVA03G30270/BjuVB02G73370/BjuVA07G43980/BjuVB03G19860	9
yellow	GO:0080158	obsolete chloroplast ribulose bisphosphate carboxylase complex biogenesis	4/801	13/68131	1.24607e-05	0.00229484	0.00210957	BjuVA07G23350/BjuVA09G47430/BjuVA04G03710/BjuV_Contig00807G00230	4
yellow	GO:0005747	mitochondrial respiratory chain complex I	10/801	164/68131	2.75789e-05	0.00435353	0.00400205	BjuVB06G30270/BjuVA03G09070/BjuVA09G58830/BjuVB04G22680/BjuVB08G32460/BjuVA03G30290/BjuVA02G38580/BjuVB07G09160/BjuVB04G06000/BjuV_Contig00876G00040	10
yellow	GO:0000028	ribosomal small subunit assembly	9/801	142/68131	5.10761e-05	0.00705489	0.00648532	BjuVB02G43780/BjuVB08G18560/BjuVB01G07500/BjuVA09G53110/BjuVA09G51480/BjuVB04G05960/BjuV_Contig00990G00250/BjuVA03G01760/BjuVA03G24830	9
yellow	GO:0032544	plastid translation	5/801	38/68131	8.07445e-05	0.00991363	0.00911326	BjuVA07G23350/BjuVA09G47430/BjuVA07G32120/BjuVA07G32110/BjuVA04G03710	5
yellow	GO:0080170	hydrogen peroxide transmembrane transport	4/801	21/68131	9.67805e-05	0.0106942	0.00983086	BjuVB02G53410/BjuVB04G07640/BjuVB08G09230/BjuVA02G40350	4
yellow	GO:0000462	maturation of SSU-rRNA from tricistronic rRNA transcript (SSU-rRNA, 5.8S rRNA, LSU-rRNA)	8/801	123/68131	0.000110745	0.0111248	0.0102267	BjuVB06G41090/BjuVB03G47500/BjuVA07G40710/BjuVA01G44410/BjuVB08G18560/BjuVA06G36890/BjuVB01G07500/BjuVA09G51480	8
yellow	GO:0009654	photosystem II oxygen evolving complex	6/801	66/68131	0.000129324	0.0119086	0.0109471	BjuVB05G20350/BjuVA01G13040/BjuVB05G59530/BjuVA08G36600/BjuVB06G55980/BjuVA03G26740	6
yellow	GO:0042547	cell wall modification involved in multidimensional cell growth	3/801	10/68131	0.000182666	0.0155266	0.0142731	BjuVB03G36560/BjuVA09G49280/BjuVB08G53820	3
yellow	GO:0000325	plant-type vacuole	8/801	158/68131	0.000605019	0.0454217	0.0417546	BjuVA02G31220/BjuVB03G24860/BjuVA06G11370/BjuVB02G05770/BjuVB02G54970/BjuVA07G43980/BjuVA05G44770/BjuV_Contig00859G00070	8
yellow	GO:0030104	water homeostasis	3/801	15/68131	0.00066287	0.0454217	0.0417546	BjuVB02G53410/BjuVB04G07640/BjuVA02G40350	3
yellow	GO:0015979	photosynthesis	12/801	334/68131	0.000687824	0.0454217	0.0417546	BjuVA01G13040/BjuVA07G16240/BjuVB01G12040/BjuVB08G29130/BjuVA06G29710/BjuVA01G10710/BjuVB05G59530/BjuVB04G11090/BjuVA08G36600/BjuVA01G22520/BjuVB06G55980/BjuVA03G26740	12
yellow	GO:0046933	proton-transporting ATP synthase activity, rotational mechanism	6/801	90/68131	0.000698795	0.0454217	0.0417546	BjuVB08G29130/BjuVB08G31180/BjuVB06G27340/BjuVB08G04230/BjuVA05G44770/BjuV_Contig00859G00070	6
yellow	GO:0031977	thylakoid lumen	7/801	127/68131	0.000799552	0.0490836	0.0451209	BjuVB05G20350/BjuVA01G13040/BjuVA03G05550/BjuVB04G28810/BjuVA04G01800/BjuVA04G16470/BjuVB06G55980	7
