# Supplementary material for: Elucidating the regulatory role of long non-coding RNAs in drought stress response during seed germination in leaf mustard
Source: PeerJ. 2024 Jul 5;12:e17661. doi: 10.7717/peerj.17661 (PMC11229683; doi:10.7717/peerj.17661)
Supplement: Supplemental Information 4 [file peerj-12-17661-s004.xlsx]

## Sheet: Aquaporin
Supplementary Table 1: Target genes of lncRNA (Aquaporin)
lncRNA	Gene	Aquaporin
MSTRG.105853	BjuVA06G41070	TIP
MSTRG.105853	BjuVB04G07640	TIP
MSTRG.105853	BjuVB08G52480	PIP
MSTRG.105853	BjuVA04G34020	PIP
MSTRG.105853	BjuVA05G08610	PIP
MSTRG.105866	BjuVA02G23530	TIP
MSTRG.105866	BjuVB05G55980	TIP
MSTRG.106206	BjuVA03G39030	TIP
MSTRG.106206	BjuVB05G60040	NIP
MSTRG.106206	BjuVB07G29830	TIP
MSTRG.107159	BjuVA03G20070	PIP
MSTRG.107159	BjuVB08G19280	PIP
MSTRG.107159	BjuVA04G01150	PIP
MSTRG.107159	BjuV_Contig00886G00110	PIP
MSTRG.107159	BjuVA04G34020	PIP
MSTRG.107159	BjuVB06G53130	PIP
MSTRG.107377	BjuVA04G28060	TIP
MSTRG.108963	BjuVA06G41070	TIP
MSTRG.108963	BjuVA04G34020	PIP
MSTRG.108963	BjuVB06G05530	PIP
MSTRG.108963	BjuVA05G05800	PIP
MSTRG.108963	BjuVB06G08390	PIP
MSTRG.108963	BjuVA04G01150	PIP
MSTRG.111902	BjuVB01G38360	TIP
MSTRG.111902	BjuVB02G53410	TIP
MSTRG.111902	BjuVA05G08610	PIP
MSTRG.113862	BjuVB05G55980	TIP
MSTRG.114891	BjuVA02G23530	TIP
MSTRG.114891	BjuVA07G39210	TIP
MSTRG.114892	BjuVA02G23530	TIP
MSTRG.114892	BjuVA07G30200	TIP
MSTRG.114892	BjuVA07G39210	TIP
MSTRG.114892	BjuVB05G55980	TIP
MSTRG.118545	BjuVA09G50630	PIP
MSTRG.12076	BjuVA02G23530	TIP
MSTRG.120951	BjuVB04G07640	TIP
MSTRG.120951	BjuVA06G41070	TIP
MSTRG.120951	BjuVA04G34020	PIP
MSTRG.121215	BjuVB03G45780	TIP
MSTRG.121324	BjuVB02G53410	TIP
MSTRG.121324	BjuVB01G38360	TIP
MSTRG.121325	BjuV_Contig00886G00110	PIP
MSTRG.124251	BjuVA06G41070	TIP
MSTRG.126990	BjuVB02G53410	TIP
MSTRG.126990	BjuVB08G19290	PIP
MSTRG.127996	BjuVB05G55980	TIP
MSTRG.1301	BjuVA02G23530	TIP
MSTRG.130644	BjuV_Contig00886G00110	PIP
MSTRG.131156	BjuVB01G38360	TIP
MSTRG.131157	BjuVB04G47550	TIP
MSTRG.131157	BjuVB06G53130	PIP
MSTRG.131157	BjuVA03G39030	TIP
MSTRG.134773	BjuVB03G35190	TIP
MSTRG.139136	BjuVA01G39180	TIP
MSTRG.139136	BjuVB01G38360	TIP
MSTRG.139136	BjuVB02G53410	TIP
MSTRG.139136	BjuVB04G07640	TIP
MSTRG.139136	BjuVA02G40350	TIP
MSTRG.145528	BjuVB08G19280	PIP
MSTRG.145528	BjuVB08G19290	PIP
MSTRG.145528	BjuVA05G05800	PIP
MSTRG.148678	BjuVA03G39030	TIP
MSTRG.14928	BjuVA02G23530	TIP
MSTRG.150302	BjuVA07G30200	TIP
MSTRG.150397	BjuVA03G39030	TIP
MSTRG.150397	BjuVA04G28060	TIP
MSTRG.150404	BjuVB08G18960	TIP
MSTRG.150404	BjuVA04G28060	TIP
MSTRG.154394	BjuVB03G35190	TIP
MSTRG.155713	BjuVB02G53410	TIP
MSTRG.157789	BjuVB03G45780	TIP
MSTRG.16085	BjuVA07G30200	TIP
MSTRG.163040	BjuVA02G23530	TIP
MSTRG.163041	BjuVA07G30200	TIP
MSTRG.163239	BjuVB03G35190	TIP
MSTRG.163239	BjuVB05G55980	TIP
MSTRG.163343	BjuVA07G30200	TIP
MSTRG.164194	BjuVA07G30200	TIP
MSTRG.164360	BjuVB08G19280	PIP
MSTRG.164360	BjuVA06G41070	TIP
MSTRG.164515	BjuVB01G07120	TIP
MSTRG.165259	BjuVB07G07850	TIP
MSTRG.168716	BjuVB03G35190	TIP
MSTRG.173897	BjuVB05G55980	TIP
MSTRG.175977	BjuVA05G05800	PIP
MSTRG.175977	BjuVB08G19290	PIP
MSTRG.19057	BjuVA05G08610	PIP
MSTRG.21485	BjuVA04G34020	PIP
MSTRG.22051	BjuVB03G35190	TIP
MSTRG.24022	BjuVA04G01150	PIP
MSTRG.24022	BjuVB04G07640	TIP
MSTRG.26412	BjuV_Contig00886G00110	PIP
MSTRG.27856	BjuVB05G60040	NIP
MSTRG.32090	BjuVA02G23530	TIP
MSTRG.35668	BjuVA02G23530	TIP
MSTRG.35668	BjuVA07G30200	TIP
MSTRG.35668	BjuVB05G55980	TIP
MSTRG.3687	BjuVB04G07640	TIP
MSTRG.3687	BjuVA06G41070	TIP
MSTRG.3687	BjuVA05G08610	PIP
MSTRG.3687	BjuVA05G05800	PIP
MSTRG.3687	BjuVB08G19290	PIP
MSTRG.3687	BjuVA04G34020	PIP
MSTRG.3687	BjuVB08G52480	PIP
MSTRG.37257	BjuVB08G18960	TIP
MSTRG.38769	BjuVA06G41070	TIP
MSTRG.38769	BjuVB04G07640	TIP
MSTRG.38769	BjuVB01G01030	PIP
MSTRG.38769	BjuVB08G52480	PIP
MSTRG.38769	BjuVA05G05800	PIP
MSTRG.39959	BjuVA05G33390	TIP
MSTRG.40310	BjuVB07G07850	TIP
MSTRG.43606	BjuVA04G28060	TIP
MSTRG.45496	BjuVB05G55980	TIP
MSTRG.51749	BjuVB02G53410	TIP
MSTRG.53128	BjuVA01G39180	TIP
MSTRG.53128	BjuVB08G19280	PIP
MSTRG.55328	BjuVB08G19290	PIP
MSTRG.55328	BjuVB04G07640	TIP
MSTRG.55328	BjuVA04G34020	PIP
MSTRG.55328	BjuVA05G08610	PIP
MSTRG.58109	BjuVB05G55980	TIP
MSTRG.58109	BjuVB03G45780	TIP
MSTRG.58160	BjuVA05G05800	PIP
MSTRG.59288	BjuVB07G07850	TIP
MSTRG.61193	BjuVA05G10940	NIP
MSTRG.61193	BjuVA05G10910	NIP
MSTRG.62016	BjuVB05G55980	TIP
MSTRG.64948	BjuVA05G33390	TIP
MSTRG.71875	BjuVB08G19280	PIP
MSTRG.71875	BjuVB04G07640	TIP
MSTRG.71875	BjuVB08G18960	TIP
MSTRG.71875	BjuVA06G41070	TIP
MSTRG.74294	BjuVA04G34020	PIP
MSTRG.74294	BjuVB08G19290	PIP
MSTRG.74294	BjuVA09G53400	PIP
MSTRG.74300	BjuVA05G10910	NIP
MSTRG.75311	BjuVA05G10940	NIP
MSTRG.76004	BjuVA06G44180	TIP
MSTRG.81844	BjuVA05G08610	PIP
MSTRG.82428	BjuVA05G10940	NIP
MSTRG.86751	BjuVA07G30200	TIP
MSTRG.92225	BjuVB01G38360	TIP
MSTRG.92226	BjuVA04G28060	TIP
MSTRG.93882	BjuVB03G35190	TIP
MSTRG.93882	BjuVA07G30200	TIP
MSTRG.9815	BjuVB08G18960	TIP
MSTRG.99833	BjuVA01G39180	TIP
MSTRG.99833	BjuVB06G53130	PIP
