# Supplementary material for: Elucidating the regulatory role of long non-coding RNAs in drought stress response during seed germination in leaf mustard
Source: PeerJ. 2024 Jul 5;12:e17661. doi: 10.7717/peerj.17661 (PMC11229683; doi:10.7717/peerj.17661)
Supplement: Supplemental Information 5 [file peerj-12-17661-s005.xlsx]

## Sheet: LEA_lncRNA_RNA
Supplementary Table 2:Target genes of lncRNA (LEA)
lncRNA	Gene	gene subfamily
MSTRG.101263	BjuVA09G10040	Dehydrin
MSTRG.104638	BjuVB04G00090	Dehydrin
MSTRG.105853	BjuVA07G41740	Dehydrin
MSTRG.105853	BjuVB03G48880	Dehydrin
MSTRG.105853	BjuVB04G32050	Dehydrin
MSTRG.105866	BjuVB02G13250	Dehydrin
MSTRG.106516	BjuVA09G58080	Dehydrin
MSTRG.106516	BjuVB08G50250	Dehydrin
MSTRG.10658	BjuVA09G10040	Dehydrin
MSTRG.106958	BjuVB04G00090	Dehydrin
MSTRG.107159	BjuVA07G28790	Dehydrin
MSTRG.107516	BjuVB02G13250	Dehydrin
MSTRG.107758	BjuVA09G44150	Dehydrin
MSTRG.107758	BjuVB02G13250	Dehydrin
MSTRG.107758	BjuVB04G00090	Dehydrin
MSTRG.109950	BjuVA09G44150	Dehydrin
MSTRG.109950	BjuVA09G58080	Dehydrin
MSTRG.109950	BjuVB04G00090	Dehydrin
MSTRG.112479	BjuVA09G10040	Dehydrin
MSTRG.112479	BjuVB02G13250	Dehydrin
MSTRG.112479	BjuVB08G50250	Dehydrin
MSTRG.119503	BjuVA07G28790	Dehydrin
MSTRG.121194	BjuVA07G28790	Dehydrin
MSTRG.121194	BjuVA07G41740	Dehydrin
MSTRG.121194	BjuVB03G48880	Dehydrin
MSTRG.121524	BjuVA09G44150	Dehydrin
MSTRG.121524	BjuVB04G00090	Dehydrin
MSTRG.12170	BjuVA09G44150	Dehydrin
MSTRG.12170	BjuVB04G00090	Dehydrin
MSTRG.122264	BjuVB04G00090	Dehydrin
MSTRG.122940	BjuVA09G10040	Dehydrin
MSTRG.122940	BjuVB02G13250	Dehydrin
MSTRG.123878	BjuVA09G44150	Dehydrin
MSTRG.123878	BjuVB02G13250	Dehydrin
MSTRG.123878	BjuVB04G00090	Dehydrin
MSTRG.124336	BjuVB03G48880	Dehydrin
MSTRG.124336	BjuVB05G57850	Dehydrin
MSTRG.126990	BjuVA07G28790	Dehydrin
MSTRG.127996	BjuVA09G44150	Dehydrin
MSTRG.127996	BjuVA09G58080	Dehydrin
MSTRG.127996	BjuVB04G00090	Dehydrin
MSTRG.129390	BjuVA09G44150	Dehydrin
MSTRG.129390	BjuVB04G00090	Dehydrin
MSTRG.131156	BjuVB03G48880	Dehydrin
MSTRG.131157	BjuVA07G41740	Dehydrin
MSTRG.131157	BjuVB03G48880	Dehydrin
MSTRG.133507	BjuVA09G44150	Dehydrin
MSTRG.133507	BjuVA09G58080	Dehydrin
MSTRG.133507	BjuVB04G00090	Dehydrin
MSTRG.134772	BjuVA09G44150	Dehydrin
MSTRG.135535	BjuVB04G00090	Dehydrin
MSTRG.135888	BjuVA07G41740	Dehydrin
MSTRG.135888	BjuVB03G48880	Dehydrin
MSTRG.139136	BjuVB03G48880	Dehydrin
MSTRG.141329	BjuVB04G00090	Dehydrin
MSTRG.142357	BjuVB02G13250	Dehydrin
MSTRG.144442	BjuVA09G44150	Dehydrin
MSTRG.144442	BjuVA09G58080	Dehydrin
MSTRG.144443	BjuVB02G13250	Dehydrin
MSTRG.145528	BjuVB03G48880	Dehydrin
MSTRG.145528	BjuVB05G57850	Dehydrin
MSTRG.147033	BjuVB07G16040	Dehydrin
MSTRG.150302	BjuVA09G10040	Dehydrin
MSTRG.150302	BjuVA09G58080	Dehydrin
MSTRG.150302	BjuVB04G00090	Dehydrin
MSTRG.154161	BjuVB02G13250	Dehydrin
MSTRG.15428	BjuVB08G50250	Dehydrin
MSTRG.154394	BjuVA09G44150	Dehydrin
MSTRG.154394	BjuVB04G00090	Dehydrin
MSTRG.155281	BjuVA02G49580	Dehydrin
MSTRG.156461	BjuVB07G16040	Dehydrin
MSTRG.158370	BjuVA09G44150	Dehydrin
MSTRG.158370	BjuVA09G58080	Dehydrin
MSTRG.158370	BjuVB02G13250	Dehydrin
MSTRG.158370	BjuVB04G00090	Dehydrin
MSTRG.158370	BjuVB08G50250	Dehydrin
MSTRG.158468	BjuVB04G00090	Dehydrin
MSTRG.160778	BjuVA09G44150	Dehydrin
MSTRG.160778	BjuVB08G50250	Dehydrin
MSTRG.16085	BjuVB04G00090	Dehydrin
MSTRG.161021	BjuVA09G10040	Dehydrin
MSTRG.161021	BjuVB02G13250	Dehydrin
MSTRG.161021	BjuVB04G00090	Dehydrin
MSTRG.163040	BjuVA09G10040	Dehydrin
MSTRG.163041	BjuVA09G10040	Dehydrin
MSTRG.163041	BjuVB02G13250	Dehydrin
MSTRG.163239	BjuVA09G10040	Dehydrin
MSTRG.163239	BjuVA09G58080	Dehydrin
MSTRG.163342	BjuVA09G58080	Dehydrin
MSTRG.163342	BjuVB02G13250	Dehydrin
MSTRG.163342	BjuVB08G50250	Dehydrin
MSTRG.163343	BjuVA09G58080	Dehydrin
MSTRG.163343	BjuVB02G13250	Dehydrin
MSTRG.163343	BjuVB08G50250	Dehydrin
MSTRG.164118	BjuVA09G58080	Dehydrin
MSTRG.164403	BjuVB04G00090	Dehydrin
MSTRG.164515	BjuVA06G16200	Dehydrin
MSTRG.164515	BjuVA07G41740	Dehydrin
MSTRG.164515	BjuVB03G48880	Dehydrin
MSTRG.164515	BjuVB04G32050	Dehydrin
MSTRG.165259	BjuVA06G16200	Dehydrin
MSTRG.167895	BjuVA02G49580	Dehydrin
MSTRG.167895	BjuVB07G16040	Dehydrin
MSTRG.168716	BjuVA09G44150	Dehydrin
MSTRG.168716	BjuVA09G58080	Dehydrin
MSTRG.168716	BjuVB08G50250	Dehydrin
MSTRG.19242	BjuVA09G44150	Dehydrin
MSTRG.19242	BjuVB04G00090	Dehydrin
MSTRG.19242	BjuVB07G16040	Dehydrin
MSTRG.20927	BjuVA09G44150	Dehydrin
MSTRG.20927	BjuVB02G13250	Dehydrin
MSTRG.20927	BjuVB04G00090	Dehydrin
MSTRG.24022	BjuVB05G57850	Dehydrin
MSTRG.26296	BjuVA09G10040	Dehydrin
MSTRG.26298	BjuVA09G44150	Dehydrin
MSTRG.26298	BjuVB08G50250	Dehydrin
MSTRG.26328	BjuVB04G00090	Dehydrin
MSTRG.26328	BjuVB07G16040	Dehydrin
MSTRG.26483	BjuVA06G16200	Dehydrin
MSTRG.32860	BjuVA09G58080	Dehydrin
MSTRG.32860	BjuVB02G13250	Dehydrin
MSTRG.32860	BjuVB04G00090	Dehydrin
MSTRG.35555	BjuVA09G10040	Dehydrin
MSTRG.35555	BjuVB02G13250	Dehydrin
MSTRG.35555	BjuVB04G00090	Dehydrin
MSTRG.35668	BjuVA09G10040	Dehydrin
MSTRG.35668	BjuVA09G58080	Dehydrin
MSTRG.35668	BjuVB04G00090	Dehydrin
MSTRG.3687	BjuVB04G32050	Dehydrin
MSTRG.37257	BjuVA06G16200	Dehydrin
MSTRG.37257	BjuVA07G41740	Dehydrin
MSTRG.38769	BjuVA07G28790	Dehydrin
MSTRG.38769	BjuVA07G41740	Dehydrin
MSTRG.38769	BjuVB04G32050	Dehydrin
MSTRG.40255	BjuVA07G41740	Dehydrin
MSTRG.45495	BjuVB02G13250	Dehydrin
MSTRG.45496	BjuVA09G58080	Dehydrin
MSTRG.45496	BjuVB02G13250	Dehydrin
MSTRG.50164	BjuVA09G58080	Dehydrin
MSTRG.50164	BjuVB04G00090	Dehydrin
MSTRG.50164	BjuVB08G50250	Dehydrin
MSTRG.50618	BjuVB08G50250	Dehydrin
MSTRG.53874	BjuVA09G44150	Dehydrin
MSTRG.53874	BjuVB04G00090	Dehydrin
MSTRG.56407	BjuVA09G10040	Dehydrin
MSTRG.56407	BjuVA09G58080	Dehydrin
MSTRG.56407	BjuVB02G13250	Dehydrin
MSTRG.56407	BjuVB04G00090	Dehydrin
MSTRG.58160	BjuVB04G32050	Dehydrin
MSTRG.59287	BjuVA06G16200	Dehydrin
MSTRG.59287	BjuVB04G32050	Dehydrin
MSTRG.59288	BjuVA06G16200	Dehydrin
MSTRG.59904	BjuVA09G10040	Dehydrin
MSTRG.62016	BjuVA09G44150	Dehydrin
MSTRG.62016	BjuVA09G58080	Dehydrin
MSTRG.62016	BjuVB08G50250	Dehydrin
MSTRG.65686	BjuVB02G13250	Dehydrin
MSTRG.6812	BjuVA01G00320	Dehydrin
MSTRG.69028	BjuVA09G44150	Dehydrin
MSTRG.71598	BjuVB04G00090	Dehydrin
MSTRG.71875	BjuVA07G28790	Dehydrin
MSTRG.71875	BjuVA07G41740	Dehydrin
MSTRG.71875	BjuVB03G48880	Dehydrin
MSTRG.72012	BjuVB02G13250	Dehydrin
MSTRG.74300	BjuVB07G16040	Dehydrin
MSTRG.75223	BjuVA09G44150	Dehydrin
MSTRG.75223	BjuVB02G13250	Dehydrin
MSTRG.75223	BjuVB08G50250	Dehydrin
MSTRG.76380	BjuVA09G58080	Dehydrin
MSTRG.76380	BjuVB02G13250	Dehydrin
MSTRG.76380	BjuVB08G50250	Dehydrin
MSTRG.77414	BjuVB02G13250	Dehydrin
MSTRG.78209	BjuVA09G10040	Dehydrin
MSTRG.81505	BjuVA09G10040	Dehydrin
MSTRG.82173	BjuVA01G00320	Dehydrin
MSTRG.85867	BjuVB07G16040	Dehydrin
MSTRG.85873	BjuVB07G16040	Dehydrin
MSTRG.86424	BjuVA09G44150	Dehydrin
MSTRG.86424	BjuVB04G00090	Dehydrin
MSTRG.88171	BjuVA09G10040	Dehydrin
MSTRG.88171	BjuVA09G58080	Dehydrin
MSTRG.88816	BjuVB04G00090	Dehydrin
MSTRG.89696	BjuVB02G13250	Dehydrin
MSTRG.91365	BjuVB02G13250	Dehydrin
MSTRG.92225	BjuVB03G48880	Dehydrin
MSTRG.93210	BjuVA09G10040	Dehydrin
MSTRG.93882	BjuVA09G58080	Dehydrin
MSTRG.93882	BjuVB02G13250	Dehydrin
MSTRG.105866	BjuVA09G33870	LEA_1
MSTRG.10658	BjuVA09G33870	LEA_1
MSTRG.107945	BjuVB07G39290	LEA_1
MSTRG.114587	BjuVB04G42820	LEA_1
MSTRG.114891	BjuVA10G30160	LEA_1
MSTRG.114891	BjuVB02G42000	LEA_1
MSTRG.121215	BjuVA08G09270	LEA_1
MSTRG.121215	BjuVB06G09660	LEA_1
MSTRG.121215	BjuVB07G39290	LEA_1
MSTRG.122940	BjuVA09G33870	LEA_1
MSTRG.1301	BjuVA10G30160	LEA_1
MSTRG.134772	BjuVA05G10010	LEA_1
MSTRG.134772	BjuVA10G30160	LEA_1
MSTRG.134772	BjuVB06G09660	LEA_1
MSTRG.141329	BjuVB02G42000	LEA_1
MSTRG.141329	BjuVB04G42820	LEA_1
MSTRG.144442	BjuVB07G39290	LEA_1
MSTRG.144443	BjuVB07G39290	LEA_1
MSTRG.147122	BjuVB07G39290	LEA_1
MSTRG.150302	BjuVA09G33870	LEA_1
MSTRG.150302	BjuVB04G42820	LEA_1
MSTRG.15244	BjuVB06G09660	LEA_1
MSTRG.153044	BjuVB04G42820	LEA_1
MSTRG.154394	BjuVB02G42000	LEA_1
MSTRG.154394	BjuVB04G42820	LEA_1
MSTRG.157299	BjuVA09G33870	LEA_1
MSTRG.157789	BjuVA05G10010	LEA_1
MSTRG.157789	BjuVB07G39290	LEA_1
MSTRG.158370	BjuVB07G39290	LEA_1
MSTRG.160778	BjuVB07G39290	LEA_1
MSTRG.16084	BjuVB02G42000	LEA_1
MSTRG.162273	BjuVB04G42820	LEA_1
MSTRG.163040	BjuVA09G33870	LEA_1
MSTRG.163041	BjuVA09G33870	LEA_1
MSTRG.163041	BjuVB04G42820	LEA_1
MSTRG.163343	BjuVB02G42000	LEA_1
MSTRG.163343	BjuVB06G09660	LEA_1
MSTRG.165164	BjuVA09G33870	LEA_1
MSTRG.165638	BjuVA09G33870	LEA_1
MSTRG.167891	BjuVA09G33870	LEA_1
MSTRG.19464	BjuVA05G10010	LEA_1
MSTRG.21407	BjuVA09G33870	LEA_1
MSTRG.21407	BjuVB02G42000	LEA_1
MSTRG.21407	BjuVB04G42820	LEA_1
MSTRG.22000	BjuVB04G42820	LEA_1
MSTRG.22373	BjuVA10G30160	LEA_1
MSTRG.32090	BjuVB04G42820	LEA_1
MSTRG.32091	BjuVA09G33870	LEA_1
MSTRG.32256	BjuVA10G30160	LEA_1
MSTRG.35555	BjuVA09G33870	LEA_1
MSTRG.35555	BjuVA10G30160	LEA_1
MSTRG.35555	BjuVB02G42000	LEA_1
MSTRG.35668	BjuVA10G30160	LEA_1
MSTRG.35668	BjuVB02G42000	LEA_1
MSTRG.35668	BjuVB04G42820	LEA_1
MSTRG.38404	BjuVA10G30160	LEA_1
MSTRG.41247	BjuVB02G42000	LEA_1
MSTRG.41887	BjuVA09G33870	LEA_1
MSTRG.41887	BjuVA10G30160	LEA_1
MSTRG.45496	BjuVB02G42000	LEA_1
MSTRG.45496	BjuVB04G42820	LEA_1
MSTRG.50164	BjuVA09G33870	LEA_1
MSTRG.50164	BjuVB04G42820	LEA_1
MSTRG.50618	BjuVA08G09270	LEA_1
MSTRG.51428	BjuVA09G33870	LEA_1
MSTRG.56251	BjuVA10G30160	LEA_1
MSTRG.56407	BjuVA10G30160	LEA_1
MSTRG.56523	BjuVA10G30160	LEA_1
MSTRG.56767	BjuVA05G10010	LEA_1
MSTRG.56767	BjuVA08G09270	LEA_1
MSTRG.56767	BjuVB06G09660	LEA_1
MSTRG.5715	BjuVB02G42000	LEA_1
MSTRG.58109	BjuVB07G39290	LEA_1
MSTRG.59904	BjuVA10G30160	LEA_1
MSTRG.59904	BjuVB04G42820	LEA_1
MSTRG.59937	BjuVB04G42820	LEA_1
MSTRG.62016	BjuVA05G10010	LEA_1
MSTRG.65686	BjuVB04G42820	LEA_1
MSTRG.65686	BjuVB07G39290	LEA_1
MSTRG.68810	BjuVA09G33870	LEA_1
MSTRG.69477	BjuVB02G42000	LEA_1
MSTRG.76380	BjuVA05G10010	LEA_1
MSTRG.76380	BjuVA09G33870	LEA_1
MSTRG.7872	BjuVA09G33870	LEA_1
MSTRG.81504	BjuVA10G30160	LEA_1
MSTRG.81504	BjuVB04G42820	LEA_1
MSTRG.86751	BjuVA10G30160	LEA_1
MSTRG.86751	BjuVB02G42000	LEA_1
MSTRG.88076	BjuVA08G09270	LEA_1
MSTRG.88171	BjuVB04G42820	LEA_1
MSTRG.91365	BjuVB07G39290	LEA_1
MSTRG.93882	BjuVA08G09270	LEA_1
MSTRG.93882	BjuVB07G39290	LEA_1
MSTRG.94690	BjuVB07G39290	LEA_1
MSTRG.10441	BjuVB08G33400	LEA_2
MSTRG.104638	BjuVB08G33400	LEA_2
MSTRG.105853	BjuVA03G41050	LEA_2
MSTRG.105853	BjuVA03G48300	LEA_2
MSTRG.105853	BjuVB01G42570	LEA_2
MSTRG.105853	BjuVB07G27560	LEA_2
MSTRG.105866	BjuVB05G13140	LEA_2
MSTRG.106516	BjuVB08G33400	LEA_2
MSTRG.10658	BjuVB08G33400	LEA_2
MSTRG.107342	BjuVB05G25220	LEA_2
MSTRG.107377	BjuVB01G42570	LEA_2
MSTRG.107377	BjuVB05G30620	LEA_2
MSTRG.107758	BjuVA02G04060	LEA_2
MSTRG.107945	BjuVB05G13140	LEA_2
MSTRG.108963	BjuVA03G41050	LEA_2
MSTRG.108963	BjuVB01G02130	LEA_2
MSTRG.108963	BjuVB07G27560	LEA_2
MSTRG.109950	BjuVA03G30930	LEA_2
MSTRG.111902	BjuVA02G29020	LEA_2
MSTRG.111902	BjuVB05G30620	LEA_2
MSTRG.111902	BjuVB07G27560	LEA_2
MSTRG.113458	BjuVA02G04060	LEA_2
MSTRG.113458	BjuVA08G38390	LEA_2
MSTRG.114892	BjuVA02G37220	LEA_2
MSTRG.114892	BjuVB05G13140	LEA_2
MSTRG.116088	BjuVB01G14700	LEA_2
MSTRG.11670	BjuVB08G26520	LEA_2
MSTRG.120757	BjuVB06G16970	LEA_2
MSTRG.120951	BjuVA04G33170	LEA_2
MSTRG.120951	BjuVB07G04750	LEA_2
MSTRG.121325	BjuVB07G27560	LEA_2
MSTRG.122940	BjuVB05G13140	LEA_2
MSTRG.123878	BjuVA03G30930	LEA_2
MSTRG.124251	BjuVA04G27500	LEA_2
MSTRG.124251	BjuVB01G42570	LEA_2
MSTRG.124251	BjuVB07G27560	LEA_2
MSTRG.128651	BjuVA02G04060	LEA_2
MSTRG.128652	BjuVA02G04060	LEA_2
MSTRG.131156	BjuVB07G04750	LEA_2
MSTRG.131156	BjuV_Contig00683G00580	LEA_2
MSTRG.133429	BjuVB05G13140	LEA_2
MSTRG.134772	BjuVB05G13140	LEA_2
MSTRG.134773	BjuVA02G04060	LEA_2
MSTRG.137656	BjuVB08G26520	LEA_2
MSTRG.139136	BjuVA04G33170	LEA_2
MSTRG.139136	BjuVB02G22560	LEA_2
MSTRG.139136	BjuVB07G04750	LEA_2
MSTRG.140974	BjuVB05G13140	LEA_2
MSTRG.141297	BjuVA02G04060	LEA_2
MSTRG.141329	BjuVA02G04060	LEA_2
MSTRG.141442	BjuVA01G42970	LEA_2
MSTRG.145308	BjuVA03G30930	LEA_2
MSTRG.145528	BjuVA01G42970	LEA_2
MSTRG.145528	BjuVB01G02130	LEA_2
MSTRG.145528	BjuVB07G04750	LEA_2
MSTRG.145528	BjuV_Contig00683G00580	LEA_2
MSTRG.148679	BjuVB07G04750	LEA_2
MSTRG.14928	BjuVA02G04060	LEA_2
MSTRG.14928	BjuVA08G38390	LEA_2
MSTRG.14928	BjuVB05G13140	LEA_2
MSTRG.14928	BjuVB05G25220	LEA_2
MSTRG.14928	BjuVB08G33400	LEA_2
MSTRG.149922	BjuVB01G00910	LEA_2
MSTRG.150302	BjuVA08G38390	LEA_2
MSTRG.150302	BjuVB05G13140	LEA_2
MSTRG.150397	BjuVA02G29020	LEA_2
MSTRG.153044	BjuVA08G38390	LEA_2
MSTRG.154394	BjuVA08G38390	LEA_2
MSTRG.154394	BjuVB08G33400	LEA_2
MSTRG.156416	BjuVB04G09660	LEA_2
MSTRG.157299	BjuVB05G13140	LEA_2
MSTRG.15823	BjuVA01G42970	LEA_2
MSTRG.158370	BjuVB05G10680	LEA_2
MSTRG.16085	BjuVA02G04060	LEA_2
MSTRG.16085	BjuVB05G13140	LEA_2
MSTRG.16085	BjuVB08G33400	LEA_2
MSTRG.162939	BjuVB05G13140	LEA_2
MSTRG.163040	BjuVB05G13140	LEA_2
MSTRG.163041	BjuVA08G38390	LEA_2
MSTRG.163041	BjuVB05G13140	LEA_2
MSTRG.163239	BjuVB08G33400	LEA_2
MSTRG.163342	BjuVB08G33400	LEA_2
MSTRG.164118	BjuVA03G30930	LEA_2
MSTRG.165163	BjuVB05G25220	LEA_2
MSTRG.165164	BjuVB05G13140	LEA_2
MSTRG.165164	BjuVB05G25220	LEA_2
MSTRG.165638	BjuVB05G13140	LEA_2
MSTRG.168716	BjuVB08G33400	LEA_2
MSTRG.169787	BjuVA02G37220	LEA_2
MSTRG.169788	BjuVA02G37220	LEA_2
MSTRG.170307	BjuVB01G14700	LEA_2
MSTRG.19498	BjuV_Contig00683G00580	LEA_2
MSTRG.20599	BjuVB05G30620	LEA_2
MSTRG.20927	BjuVA08G38390	LEA_2
MSTRG.21407	BjuVB05G13140	LEA_2
MSTRG.21407	BjuVB08G33400	LEA_2
MSTRG.21485	BjuVA02G29020	LEA_2
MSTRG.21485	BjuVB07G04750	LEA_2
MSTRG.22050	BjuVB08G33400	LEA_2
MSTRG.22051	BjuVB05G13140	LEA_2
MSTRG.22051	BjuVB05G25220	LEA_2
MSTRG.22373	BjuVB05G25220	LEA_2
MSTRG.23281	BjuVB05G13140	LEA_2
MSTRG.24022	BjuVB07G27560	LEA_2
MSTRG.24298	BjuVA02G37220	LEA_2
MSTRG.24298	BjuVB05G13140	LEA_2
MSTRG.26298	BjuVA02G04060	LEA_2
MSTRG.26412	BjuVA04G27500	LEA_2
MSTRG.29735	BjuVB05G13140	LEA_2
MSTRG.32090	BjuVA02G04060	LEA_2
MSTRG.32090	BjuVB05G13140	LEA_2
MSTRG.32090	BjuVB08G33400	LEA_2
MSTRG.32091	BjuVB05G13140	LEA_2
MSTRG.32256	BjuVA02G04060	LEA_2
MSTRG.32256	BjuVB05G13140	LEA_2
MSTRG.32256	BjuVB05G25220	LEA_2
MSTRG.32256	BjuVB08G33400	LEA_2
MSTRG.32860	BjuVA03G30930	LEA_2
MSTRG.32860	BjuVB08G33400	LEA_2
MSTRG.35555	BjuVB05G13140	LEA_2
MSTRG.35668	BjuVA02G04060	LEA_2
MSTRG.35668	BjuVB05G13140	LEA_2
MSTRG.35668	BjuVB08G33400	LEA_2
MSTRG.36451	BjuVB05G13140	LEA_2
MSTRG.3687	BjuVA03G41050	LEA_2
MSTRG.3687	BjuVA03G48300	LEA_2
MSTRG.3687	BjuVB02G60620	LEA_2
MSTRG.37257	BjuVA04G27500	LEA_2
MSTRG.38769	BjuVA01G42970	LEA_2
MSTRG.38769	BjuVA04G27500	LEA_2
MSTRG.38769	BjuVB02G60620	LEA_2
MSTRG.39954	BjuVB06G16970	LEA_2
MSTRG.40310	BjuVA03G48300	LEA_2
MSTRG.40310	BjuVA04G27500	LEA_2
MSTRG.42596	BjuVA03G53950	LEA_2
MSTRG.45496	BjuVA02G04060	LEA_2
MSTRG.45496	BjuVB08G33400	LEA_2
MSTRG.51428	BjuVA08G38390	LEA_2
MSTRG.53890	BjuVA01G42970	LEA_2
MSTRG.55328	BjuVA04G07220	LEA_2
MSTRG.56251	BjuVB08G33400	LEA_2
MSTRG.56252	BjuVA08G38390	LEA_2
MSTRG.56407	BjuVB05G13140	LEA_2
MSTRG.56497	BjuVA04G27500	LEA_2
MSTRG.5715	BjuVB05G13140	LEA_2
MSTRG.58109	BjuVB08G33400	LEA_2
MSTRG.58160	BjuVA04G33170	LEA_2
MSTRG.58426	BjuVB05G13140	LEA_2
MSTRG.58564	BjuVB01G02130	LEA_2
MSTRG.59904	BjuVB05G13140	LEA_2
MSTRG.59904	BjuVB08G33400	LEA_2
MSTRG.62016	BjuVA03G30930	LEA_2
MSTRG.63198	BjuVA03G41050	LEA_2
MSTRG.65229	BjuVB05G25220	LEA_2
MSTRG.65686	BjuVB05G13140	LEA_2
MSTRG.68790	BjuVA02G37220	LEA_2
MSTRG.69477	BjuVA08G38390	LEA_2
MSTRG.71693	BjuVA08G38390	LEA_2
MSTRG.71875	BjuVA04G27500	LEA_2
MSTRG.71875	BjuVB07G27560	LEA_2
MSTRG.72012	BjuVA08G38390	LEA_2
MSTRG.74294	BjuVB05G30620	LEA_2
MSTRG.76380	BjuVB08G33400	LEA_2
MSTRG.76893	BjuVA04G21130	LEA_2
MSTRG.77414	BjuVB05G13140	LEA_2
MSTRG.77414	BjuVB08G33400	LEA_2
MSTRG.7872	BjuVB05G13140	LEA_2
MSTRG.81844	BjuVB01G42570	LEA_2
MSTRG.88171	BjuVB05G13140	LEA_2
MSTRG.92225	BjuVB07G04750	LEA_2
MSTRG.93210	BjuVB05G13140	LEA_2
MSTRG.109454	BjuVB05G20000	LEA_3
MSTRG.158364	BjuVB05G20000	LEA_3
MSTRG.35506	BjuVB05G20000	LEA_3
MSTRG.45641	BjuVB05G20000	LEA_3
MSTRG.59788	BjuVB08G32670	LEA_3
MSTRG.85873	BjuVA01G22180	LEA_3
MSTRG.10072	BjuVA04G06600	LEA_4
MSTRG.101263	BjuVA05G33830	LEA_4
MSTRG.106516	BjuVA05G33830	LEA_4
MSTRG.106516	BjuVB01G03080	LEA_4
MSTRG.106516	BjuVB01G37380	LEA_4
MSTRG.106958	BjuVA05G32330	LEA_4
MSTRG.106958	BjuVA05G33830	LEA_4
MSTRG.106958	BjuVB01G03080	LEA_4
MSTRG.106958	BjuVB01G37380	LEA_4
MSTRG.107758	BjuVA05G32330	LEA_4
MSTRG.107758	BjuVB01G03080	LEA_4
MSTRG.107758	BjuVB01G37380	LEA_4
MSTRG.109950	BjuVB04G15950	LEA_4
MSTRG.112478	BjuVA05G32330	LEA_4
MSTRG.112478	BjuV_Contig00685G00090	LEA_4
MSTRG.112479	BjuVA04G06600	LEA_4
MSTRG.112479	BjuVA05G32330	LEA_4
MSTRG.112479	BjuVA05G33830	LEA_4
MSTRG.112479	BjuVB01G03080	LEA_4
MSTRG.113458	BjuVB01G03080	LEA_4
MSTRG.113458	BjuVB04G15950	LEA_4
MSTRG.12170	BjuVB01G03080	LEA_4
MSTRG.12170	BjuVB01G37380	LEA_4
MSTRG.123878	BjuVA05G33830	LEA_4
MSTRG.123878	BjuVB01G03080	LEA_4
MSTRG.124552	BjuVB04G15950	LEA_4
MSTRG.124683	BjuVA04G06600	LEA_4
MSTRG.127996	BjuVA05G33830	LEA_4
MSTRG.127996	BjuVB01G03080	LEA_4
MSTRG.1301	BjuVA04G27980	LEA_4
MSTRG.134772	BjuVA04G06600	LEA_4
MSTRG.134772	BjuVB01G03080	LEA_4
MSTRG.134772	BjuVB04G15950	LEA_4
MSTRG.134773	BjuVA04G27980	LEA_4
MSTRG.143378	BjuVA04G27980	LEA_4
MSTRG.144442	BjuVA04G06600	LEA_4
MSTRG.144442	BjuVB01G03080	LEA_4
MSTRG.144442	BjuVB01G07200	LEA_4
MSTRG.144442	BjuVB04G15950	LEA_4
MSTRG.144443	BjuVA04G32190	LEA_4
MSTRG.144443	BjuVB01G37380	LEA_4
MSTRG.145308	BjuVA04G27980	LEA_4
MSTRG.145308	BjuVA05G33830	LEA_4
MSTRG.147121	BjuVA04G27980	LEA_4
MSTRG.147122	BjuVA04G27980	LEA_4
MSTRG.147122	BjuVA04G32190	LEA_4
MSTRG.147122	BjuVB01G37380	LEA_4
MSTRG.147122	BjuV_Contig00685G00090	LEA_4
MSTRG.150302	BjuVA04G27980	LEA_4
MSTRG.150302	BjuVA04G32190	LEA_4
MSTRG.150302	BjuVB01G03080	LEA_4
MSTRG.150302	BjuVB01G37380	LEA_4
MSTRG.151090	BjuVA04G27980	LEA_4
MSTRG.151090	BjuV_Contig00685G00090	LEA_4
MSTRG.154394	BjuVA05G32330	LEA_4
MSTRG.154394	BjuVA05G33830	LEA_4
MSTRG.154394	BjuVB01G03080	LEA_4
MSTRG.154394	BjuVB01G37380	LEA_4
MSTRG.154394	BjuVB04G15950	LEA_4
MSTRG.154743	BjuVA04G06600	LEA_4
MSTRG.158370	BjuVA05G32330	LEA_4
MSTRG.158370	BjuVA05G33830	LEA_4
MSTRG.158370	BjuVB01G03080	LEA_4
MSTRG.158370	BjuVB01G37380	LEA_4
MSTRG.158468	BjuVB01G37380	LEA_4
MSTRG.160778	BjuVA04G27980	LEA_4
MSTRG.160778	BjuVA05G32330	LEA_4
MSTRG.160778	BjuVB01G37380	LEA_4
MSTRG.160778	BjuVB04G15950	LEA_4
MSTRG.160778	BjuV_Contig00685G00090	LEA_4
MSTRG.16085	BjuVA05G33830	LEA_4
MSTRG.161021	BjuVB01G03080	LEA_4
MSTRG.161021	BjuVB01G37380	LEA_4
MSTRG.163239	BjuV_Contig00685G00090	LEA_4
MSTRG.163342	BjuVB01G07200	LEA_4
MSTRG.163342	BjuV_Contig00685G00090	LEA_4
MSTRG.163343	BjuVA04G06600	LEA_4
MSTRG.163343	BjuVA05G32330	LEA_4
MSTRG.163343	BjuVB01G03080	LEA_4
MSTRG.163343	BjuVB01G07200	LEA_4
MSTRG.163343	BjuVB03G13430	LEA_4
MSTRG.163343	BjuVB04G15950	LEA_4
MSTRG.164118	BjuVA04G32190	LEA_4
MSTRG.164194	BjuVA04G06600	LEA_4
MSTRG.168715	BjuVA04G32190	LEA_4
MSTRG.168715	BjuVA05G32330	LEA_4
MSTRG.168715	BjuVB01G03080	LEA_4
MSTRG.168715	BjuVB01G37380	LEA_4
MSTRG.168715	BjuV_Contig00685G00090	LEA_4
MSTRG.168716	BjuVA05G32330	LEA_4
MSTRG.168716	BjuVB01G03080	LEA_4
MSTRG.168716	BjuVB01G37380	LEA_4
MSTRG.168716	BjuVB04G15950	LEA_4
MSTRG.168716	BjuV_Contig00685G00090	LEA_4
MSTRG.19242	BjuVA05G32330	LEA_4
MSTRG.19242	BjuVB01G03080	LEA_4
MSTRG.19242	BjuVB01G37380	LEA_4
MSTRG.21407	BjuVA04G06600	LEA_4
MSTRG.21407	BjuVA04G27980	LEA_4
MSTRG.21407	BjuVB01G07200	LEA_4
MSTRG.22050	BjuVA04G27980	LEA_4
MSTRG.22050	BjuVA05G32330	LEA_4
MSTRG.24945	BjuVB04G15950	LEA_4
MSTRG.26296	BjuVA04G27980	LEA_4
MSTRG.26298	BjuVA05G32330	LEA_4
MSTRG.26298	BjuVA05G33830	LEA_4
MSTRG.26298	BjuVB01G03080	LEA_4
MSTRG.26298	BjuVB01G37380	LEA_4
MSTRG.26298	BjuVB04G15950	LEA_4
MSTRG.32860	BjuVA04G06600	LEA_4
MSTRG.32860	BjuVB01G03080	LEA_4
MSTRG.32860	BjuVB04G15950	LEA_4
MSTRG.45496	BjuVA05G32330	LEA_4
MSTRG.45496	BjuVA05G33830	LEA_4
MSTRG.45496	BjuVB01G03080	LEA_4
MSTRG.45496	BjuVB01G37380	LEA_4
MSTRG.4588	BjuVB01G03080	LEA_4
MSTRG.4588	BjuV_Contig00685G00090	LEA_4
MSTRG.50164	BjuVA04G27980	LEA_4
MSTRG.50618	BjuVA04G06600	LEA_4
MSTRG.50619	BjuVA04G06600	LEA_4
MSTRG.53827	BjuVA05G32330	LEA_4
MSTRG.53874	BjuVA05G32330	LEA_4
MSTRG.53874	BjuVA05G33830	LEA_4
MSTRG.53874	BjuVB01G03080	LEA_4
MSTRG.53874	BjuVB01G37380	LEA_4
MSTRG.56252	BjuVB01G03080	LEA_4
MSTRG.56767	BjuVB01G07200	LEA_4
MSTRG.56859	BjuVA05G32330	LEA_4
MSTRG.56859	BjuVB01G37380	LEA_4
MSTRG.58109	BjuVA04G06600	LEA_4
MSTRG.58109	BjuVA05G33830	LEA_4
MSTRG.58110	BjuVB01G03080	LEA_4
MSTRG.6093	BjuVB01G03080	LEA_4
MSTRG.62016	BjuVA04G06600	LEA_4
MSTRG.62016	BjuV_Contig00685G00090	LEA_4
MSTRG.65686	BjuVA04G06600	LEA_4
MSTRG.65686	BjuVB01G07200	LEA_4
MSTRG.69028	BjuVA05G32330	LEA_4
MSTRG.69028	BjuVB01G37380	LEA_4
MSTRG.69028	BjuVB04G15950	LEA_4
MSTRG.72012	BjuVB04G15950	LEA_4
MSTRG.75223	BjuVB01G03080	LEA_4
MSTRG.75223	BjuVB01G37380	LEA_4
MSTRG.76380	BjuVA04G27980	LEA_4
MSTRG.88171	BjuVA04G27980	LEA_4
MSTRG.88816	BjuVA05G32330	LEA_4
MSTRG.88816	BjuVB01G03080	LEA_4
MSTRG.88816	BjuVB01G37380	LEA_4
MSTRG.91365	BjuVA04G27980	LEA_4
MSTRG.92950	BjuVB01G07200	LEA_4
MSTRG.93882	BjuVA04G27980	LEA_4
MSTRG.93882	BjuVA04G32190	LEA_4
MSTRG.93882	BjuV_Contig00685G00090	LEA_4
MSTRG.101263	BjuVB06G05870	LEA_5
MSTRG.10658	BjuVA01G23870	LEA_5
MSTRG.10658	BjuVA03G22210	LEA_5
MSTRG.10658	BjuVB05G21280	LEA_5
MSTRG.106958	BjuVA05G06170	LEA_5
MSTRG.106958	BjuVB08G21590	LEA_5
MSTRG.121215	BjuVB02G60870	LEA_5
MSTRG.121524	BjuVA05G06170	LEA_5
MSTRG.121524	BjuVB06G05870	LEA_5
MSTRG.12170	BjuVB06G05870	LEA_5
MSTRG.122940	BjuVA03G22210	LEA_5
MSTRG.122940	BjuVB05G21280	LEA_5
MSTRG.127631	BjuVA05G06170	LEA_5
MSTRG.129390	BjuVB08G21590	LEA_5
MSTRG.1301	BjuVA03G22210	LEA_5
MSTRG.134772	BjuVB06G05870	LEA_5
MSTRG.134773	BjuVB06G05870	LEA_5
MSTRG.137129	BjuVA05G06170	LEA_5
MSTRG.141329	BjuVB06G05870	LEA_5
MSTRG.142357	BjuVB06G05870	LEA_5
MSTRG.145308	BjuVB06G05870	LEA_5
MSTRG.145308	BjuVB08G21590	LEA_5
MSTRG.147122	BjuVB08G21590	LEA_5
MSTRG.150302	BjuVA01G23870	LEA_5
MSTRG.150302	BjuVB05G21280	LEA_5
MSTRG.150302	BjuVB06G05870	LEA_5
MSTRG.154394	BjuVA03G22210	LEA_5
MSTRG.154394	BjuVB06G05870	LEA_5
MSTRG.158370	BjuVB08G21590	LEA_5
MSTRG.16085	BjuVA03G22210	LEA_5
MSTRG.161021	BjuVA05G06170	LEA_5
MSTRG.161021	BjuVB06G05870	LEA_5
MSTRG.163040	BjuVA01G23870	LEA_5
MSTRG.163040	BjuVA03G22210	LEA_5
MSTRG.163040	BjuVB05G21280	LEA_5
MSTRG.163041	BjuVA01G23870	LEA_5
MSTRG.163239	BjuVA05G06170	LEA_5
MSTRG.164118	BjuVA05G06170	LEA_5
MSTRG.164118	BjuVB06G05870	LEA_5
MSTRG.164118	BjuVB08G21590	LEA_5
MSTRG.164194	BjuVB02G60870	LEA_5
MSTRG.166009	BjuVA01G23870	LEA_5
MSTRG.166010	BjuVA01G23870	LEA_5
MSTRG.167892	BjuVA03G22210	LEA_5
MSTRG.167895	BjuVA05G06170	LEA_5
MSTRG.168716	BjuVB06G05870	LEA_5
MSTRG.176791	BjuVA01G23870	LEA_5
MSTRG.19242	BjuVA05G06170	LEA_5
MSTRG.26298	BjuVB06G05870	LEA_5
MSTRG.35555	BjuVA03G22210	LEA_5
MSTRG.35668	BjuVA03G22210	LEA_5
MSTRG.35668	BjuVB06G05870	LEA_5
MSTRG.45496	BjuVA03G22210	LEA_5
MSTRG.49469	BjuVA05G06170	LEA_5
MSTRG.51173	BjuVA01G23870	LEA_5
MSTRG.51173	BjuVB05G21280	LEA_5
MSTRG.56523	BjuVB05G21280	LEA_5
MSTRG.58412	BjuVA03G22210	LEA_5
MSTRG.59937	BjuVA01G23870	LEA_5
MSTRG.6093	BjuVA05G06170	LEA_5
MSTRG.76380	BjuVA01G23870	LEA_5
MSTRG.76380	BjuVA03G22210	LEA_5
MSTRG.76380	BjuVB05G21280	LEA_5
MSTRG.78209	BjuVB06G05870	LEA_5
MSTRG.7872	BjuVA01G23870	LEA_5
MSTRG.85867	BjuVA05G06170	LEA_5
MSTRG.85873	BjuVA05G06170	LEA_5
MSTRG.91365	BjuVB05G21280	LEA_5
MSTRG.9278	BjuVB08G21590	LEA_5
MSTRG.93882	BjuVB02G60870	LEA_5
MSTRG.93882	BjuVB05G21280	LEA_5
MSTRG.144442	BjuVB02G15050	LEA_6
MSTRG.15247	BjuVB02G15050	LEA_6
MSTRG.101263	BjuVA05G26330	SMP
MSTRG.101263	BjuVB07G26730	SMP
MSTRG.107758	BjuVA05G26330	SMP
MSTRG.109950	BjuVA05G26330	SMP
MSTRG.109950	BjuVB08G13530	SMP
MSTRG.112478	BjuVA05G26330	SMP
MSTRG.112479	BjuVB07G26730	SMP
MSTRG.113458	BjuVB07G26730	SMP
MSTRG.129390	BjuVB07G26730	SMP
MSTRG.1301	BjuVB01G31660	SMP
MSTRG.134772	BjuVA05G26330	SMP
MSTRG.135535	BjuVA05G26330	SMP
MSTRG.135535	BjuVB01G31660	SMP
MSTRG.141297	BjuVB07G26730	SMP
MSTRG.141329	BjuVB01G31660	SMP
MSTRG.150302	BjuVB01G31660	SMP
MSTRG.15429	BjuVA05G26330	SMP
MSTRG.154394	BjuVB01G31660	SMP
MSTRG.157299	BjuVB01G31660	SMP
MSTRG.158370	BjuVB07G26730	SMP
MSTRG.163040	BjuVB01G31660	SMP
MSTRG.163041	BjuVA05G26330	SMP
MSTRG.163041	BjuVB01G31660	SMP
MSTRG.163239	BjuVA05G26330	SMP
MSTRG.163239	BjuVB08G13530	SMP
MSTRG.163343	BjuVA05G26330	SMP
MSTRG.19242	BjuVA05G26330	SMP
MSTRG.19242	BjuVB07G26730	SMP
MSTRG.22298	BjuVB01G31660	SMP
MSTRG.23297	BjuVB07G26730	SMP
MSTRG.26298	BjuVB01G31660	SMP
MSTRG.32091	BjuVB01G31660	SMP
MSTRG.35668	BjuVA05G26330	SMP
MSTRG.35668	BjuVB01G31660	SMP
MSTRG.40437	BjuVB08G13530	SMP
MSTRG.45496	BjuVA05G26330	SMP
MSTRG.45496	BjuVB01G31660	SMP
MSTRG.53899	BjuVA05G26330	SMP
MSTRG.56251	BjuVB01G31660	SMP
MSTRG.56859	BjuVB07G26730	SMP
MSTRG.6093	BjuVB07G26730	SMP
MSTRG.6093	BjuVB08G13530	SMP
MSTRG.69028	BjuVB07G26730	SMP
MSTRG.71598	BjuVB01G31660	SMP
MSTRG.76380	BjuVB01G31660	SMP
MSTRG.88171	BjuVB01G31660	SMP
MSTRG.88816	BjuVA05G26330	SMP
MSTRG.93210	BjuVA05G26330	SMP
MSTRG.93210	BjuVB01G31660	SMP
MSTRG.93882	BjuVA05G26330	SMP
MSTRG.9807	BjuVA02G16030	SMP
