# Supplementary material for: Elucidating the regulatory role of long non-coding RNAs in drought stress response during seed germination in leaf mustard
Source: PeerJ. 2024 Jul 5;12:e17661. doi: 10.7717/peerj.17661 (PMC11229683; doi:10.7717/peerj.17661)
Supplement: Supplemental Information 6 [file peerj-12-17661-s006.xlsx]

## Sheet: qRT-PCR primer
Gene family	Target gene ID	lncRNA		Primer (5'-3')
Aquaporin gene family	BjuVA06G41070	MSTRG.105853	F	TCGTCGTGGTGTGCTTG
			R	ACCGTCGCTGTCTTTTT
	BjuVB04G47550	MSTRG.131157	F	TTCGACAACAGTTCACTCT
			R	TTTCTCATCTCTGCTACCA
	BjuVA04G01150	MSTRG.24022	F	GAGGAAGTCTTTTGGGA
			R	CTCTGCTTCATCACCATAA
	BjuVB05G55980	MSTRG.35668	F	TGGCTTTTGACTCTGGG
			R	CCGTCTACGCTTGTGCT
LEA gene family	BjuVA09G10040	MSTRG.10658	F	GGATTGGATGCTGGGTA
			R	CCTGGTTGGTGTGTGCT
	BjuVB02G42000	MSTRG.114891	F	TCACCTATGTTTCCCCG
			R	TTTCTTTCCCTGTCCAC
	BjuVB08G21590	MSTRG.106958	F	GAAGCCTAAGAGGGAAG
			R	GCTGAAGTTGGAAGAGAG
	BjuVA05G26330	MSTRG.101263	F	CATCTCGTGGTTTGTTG
			R	CGAAAGGTTCCTATTGG
Reference gene	BjuActin7		F	AGGAATCGCTGACCGTATGA
			R	GTTGGAAAGTGCTGAGGGAA
